# Supplementary material
Source: publisher figshare collection journal article supplement (https://acs.figshare.com/ndownloader/files/13613198)
Supplement: Supplementary file 1 [file 13613198]

## Sheet: Table S-3
Table S-3. Summary of semi-tryptic peptides and proteins assayed in the STEPP-PP geldanamycin binding study and hit selection result.
Table columns: 'Peptde sequence' is the assigned amino acid sequence with the amino acid before and after the sequence shown in brackets "[ ]".
'Fold change' are (-)/(+) TMT intensity ratios, logarithm base 2 transformed, at each urea concentration specified below (when calculating the logarithm transformed ratio, if if either (+) or (-) TMT intensity was 0, the logarithm transformed ratio cannot be calculated mathematically, then the number '0' was given as the value). '#N/A' means the peptide was not assayed at the urea concentration s…
Significant fold-change deviation' specifies if the corresponding fold change deviates more than 3 sigma from the global average fold change value. 'Hit ' column determines if the assayed peptide pass the hit criteria (see text).
Peptide sequence	Protein accession	Gene	Fold change										Significant fold change deviation										Hit
			0	0.6	1.3	2	2.6	3.3	4	4.6	5.7	6.8	0	0.6	1.3	2	2.6	3.3	4	4.6	5.7	6.8
[N].lVEQAkLTAATNAkQ.[-]	P06169	PDC1	0.323561	0.334856	0.0692825	-0.129919	-0.099242	0.0498296	0.148288	0.0602245	-0.22629	0.0311744
[F].vLNNDGYTIEk.[L]	P06169	PDC1	0.25436	-0.0454761	-0.115412	-0.0212274	0.407087	0.0624403	0.408889	-0.137757	0.0166199	-0.362133
[R].vATTGEWDkLTQDkS.[F]	P06169	PDC1	0.278195	0.288707	-0.0241976	-0.13543	0.194367	0.04807	0.240609	0.12844	-0.159623	0.0504067
[R].VATTGEWDkLTQDkSFNDnSk.[I]	P06169	PDC1	0.331877	#N/A	0.0304481	#N/A	0.326006	#N/A	0.235796	#N/A	-0.242668	#N/A		#N/A		#N/A		#N/A		#N/A		#N/A
[R].vATTGEWDk.[L]	P06169	PDC1	0.0618453	0.195915	-0.0478488	-0.113825	0.220339	0.0579217	0.277337	0.435512	0.520081	-0.0497526
[A].fAAEEIDPkkR.[V]	P06169	PDC1	0.0647669	0.19521	-0.0975707	-0.181646	0.193999	0.0564412	0.322578	0.200411	0.233132	0.10583
[E].lnAAYAADGYAR.[I]	P06169	PDC1	0.024782	0.309237	-0.0369986	-0.086985	0.102682	0.0753486	0.201425	0.113006	0.0515835	0.0150923
[E].iQGWDHLSLLPTFGAkDYETHR.[V]	P06169	PDC1	0.601752	#N/A	0	#N/A	-0.206938	#N/A	-0.282011	#N/A	0.0205486	#N/A		#N/A		#N/A		#N/A		#N/A		#N/A
[Q].lTVQEISTMIR.[W]	P06169	PDC1	-0.155265	0.219918	-0.274528	0.0612475	0.171395	0.0205919	0.213364	-0.0808864	0.0157725	-0.0643933
[A].fVTPMGkGSIDEQHPR.[Y]	P06169	PDC1	-0.0220508	0.59027	0.118773	-0.0260306	0.227906	0.0751357	0.213846	0.178435	-0.255521	0.116932
[L].gnGDFTVFHR.[MI]	P06169	PDC1	0.206247	#N/A	-0.182499	#N/A	0.0191595	#N/A	-0.119702	#N/A	-0.219928	#N/A		#N/A		#N/A		#N/A		#N/A		#N/A
[W].aGNANELNAAYAADGYAR.[I]	P06169	PDC1	-0.0875065	#N/A	-0.24835	#N/A	0.157787	#N/A	0.371523	#N/A	-0.260314	#N/A		#N/A		#N/A		#N/A		#N/A		#N/A
[S].lLDkIYEVEGMR.[W]	P06169	PDC1	0.194553	0.214357	0.158528	-0.0421116	0.33126	0.0726895	0.300811	0.238125	0.111009	-0.0169081
[T].iADAAkGYkPVAVPAR.[T]	P06169	PDC1	0.343229	0.357731	-0.115057	-0.123689	0.167611	-0.0145503	0.330239	0.261857	0.102406	0.063385
[N].lVDLNVPAk.[L]	P06169	PDC1	-0.247069	0.241685	0.0300381	-0.0416881	0.179079	0.0846641	0.222614	0.0878719	-0.0362473	0.0031962
[L].lTTIADAAkGYkPVAVPAR.[T]	P06169	PDC1	0.336365	0.0602122	-0.0563361	-0.297191	0.151929	0.0275777	0.176678	0.421884	0.0310503	0.0849698
[P].vFDAPQNLVEQAk.[L]	P06169	PDC1	0.307759	0.317484	-0.0539873	-0.126767	0.161769	0.220217	0.312615	0.0101558	-0.105479	0.22037
[T].aMITDIATAPAEIDR.[C]	P06169	PDC1	0.616904	#N/A	-0.0815903	#N/A	-0.0589015	#N/A	0.0797964	#N/A	-0.522349	#N/A		#N/A		#N/A		#N/A		#N/A		#N/A
[R].vATTGEWDkLTQDkSFNDnSkIR.[M]	P06169	PDC1	0.215491	0.101095	0.00527376	-0.308687	0.000895618	0.131624	0.209908	0.136034	-0.27416	0.135647
[T].lGAAFAAEEIDPkkR.[V]	P06169	PDC1	-0.0737138	0.254738	-0.175736	-0.274087	0.0352466	0.00877911	0.226258	0.179232	0.0427738	0.0443285
[T].lGnGDFTVFHR.[MI]	P06169	PDC1	0.196495	0.24718	0.138367	-0.0371798	0.0783099	-0.0550656	0.121534	0.0840417	0.112595	0.107446
[S].lLPTFGAkDYETHR.[V]	P06169	PDC1	0.4705	0.830184	0.00270169	-0.13665	-0.119626	0.0812523	0.124502	0.131091	-0.174348	0.125608
[R].VATTGEWDkLTQDkSFN.[D]	P06169	PDC1	-0.300891	#N/A	0.119526	#N/A	0.125988	#N/A	0.196298	#N/A	-0.057431	#N/A		#N/A		#N/A		#N/A		#N/A		#N/A
[N].aTFPGVQMk.[F]	P06169	PDC1	0.153723	0.336426	-0.0723919	-0.0526717	0.199946	0.129476	0.274688	0.19167	0.19523	0.122163
[M].iTDIATAPAEIDR.[C]	P06169	PDC1	-0.224352	0.0790984	0.0197481	0.0510886	0.281579	0.0752974	0.104399	0.05639	0.108075	-0.0333298
[L].lDkIYEVEGMR.[W]	P06169	PDC1	0.0270599	0.300536	-0.0259207	-0.0921027	0.245201	0.00783633	0.222793	0.204193	-0.000671828	0.18476
[D].lTQFPAFVTPMGkGSIDEQHPR.[Y]	P06169	PDC1	0.808628	#N/A	-0.52575	#N/A	0.35853	#N/A	0.206529	#N/A	-0.108606	#N/A		#N/A		#N/A		#N/A		#N/A		#N/A
[Q].lLLHHTLGnGDFTVFHR.[MI]	P06169	PDC1	0.122071	0	0.446382	-0.685171	0.0409724	-0.659586	0.239293	0.472321	-0.145909	-1.03789										<-3 sigma
[K].iRnATFPGVQMkF.[VA]	P06169	PDC1	0.242856	#N/A	0.580261	#N/A	0.441904	#N/A	0.148196	#N/A	-0.128391	#N/A		#N/A		#N/A		#N/A		#N/A		#N/A
[Y].vTQRPVYLGLPANLVDLNVPAk.[L]	P06169	PDC1	0.509085	#N/A	0.0564721	#N/A	0.0590468	#N/A	0.08439	#N/A	-0.225507	#N/A		#N/A		#N/A		#N/A		#N/A		#N/A
[K].lIDLTQFPAFVTPmGkGSIDEQHPR.[Y]	P06169	PDC1	0.141515	-0.331098	0.133564	-0.121095	0.00799702	-0.131479	0.121723	0.0897765	-0.111038	0.0349133
[F].vTPmGkGSIDEQHPR.[Y]	P06169	PDC1	0.207962	0.212822	0.0730671	-0.0221024	0.202046	0.105077	0.247771	0.076655	-0.1697	0.0681469
[R].mSANISETTAmITDIATAPAEIDR.[C]	P06169	PDC1	0.207041	0.0535718	0.0524574	-0.160261	-0.0956114	-0.210499	0.0132622	0.148158	-0.183543	0.196606
[N].lSLLDkIYEVEGmR.[W]	P06169	PDC1	-0.0888006	-0.00533966	0.164391	-0.402733	0.141653	0.236455	0.20716	0.42579	0.12474	0.0246443
[N].aAYAADGYAR.[I]	P06169	PDC1	-0.286751	0.234571	-0.0752424	0.0452244	0.198878	0.0347472	0.260358	0.0720883	0.382765	0.166118
[L].nAAYAADGYAR.[I]	P06169	PDC1	0.0496109	#N/A	-0.0393392	#N/A	0.141613	#N/A	0.14394	#N/A	-0.13716	#N/A		#N/A		#N/A		#N/A		#N/A		#N/A
[P].mGkGSIDEQHPR.[Y]	P06169	PDC1	0.0845878	0.153897	0.144706	-0.0319633	0.181395	-0.0225787	0.188411	-0.0414272	0.152566	-0.120427
[M].sANISETTAMITDIATAPAEIDR.[C]	P06169	PDC1	-0.274251	#N/A	-0.00322611	#N/A	0.316428	#N/A	0.308837	#N/A	-0.147434	#N/A		#N/A		#N/A		#N/A		#N/A		#N/A
[Y].lGLPANLVDLNVPAk.[L]	P06169	PDC1	0.824548	1.17078	0.188457	-0.00710624	-0.137122	0.0486937	0.110885	0.0511528	-0.144622	0.0144364		>3 sigma
[N].iSETTAMITDIATAPAEIDR.[C]	P06169	PDC1	-0.057343	0.291806	-0.0106936	-0.144743	-0.0226692	-0.106787	0.118636	-0.207957	-0.215707	0.265229
[K].lLTTIADAAkGYkP.[V]	P06169	PDC1	0.147066	#N/A	0.106689	#N/A	0.194645	#N/A	0.110977	#N/A	-0.137597	#N/A		#N/A		#N/A		#N/A		#N/A		#N/A
[KQ].lTAATNAkQ.[-]	P06169	PDC1	-0.0144142	0.180825	-0.0833603	-0.115493	0.170289	0.0836657	0.196444	0.0622303	-0.140691	0.109815
[T].fGAkDYETHR.[V]	P06169	PDC1	0.0656705	0.214535	-0.127455	-0.126356	0.110805	0.117883	0.174745	0.186282	-0.162683	0.0969625
[F].gAkDYETHR.[V]	P06169	PDC1	-0.113321	0.276571	-0.12887	-0.0254177	0.125408	0.0816582	0.13816	0.0233075	0.0350844	0.0439941
[G].sIDEQHPR.[Y]	P06169	PDC1	-0.288504	0.223597	0.0275601	-0.00893776	0.12884	0.153892	0.157065	-0.163831	0.116943	-0.46264
[K].lLQTPIDmSLkPNDAESEkEVIDTILA.[L]	P06169	PDC1	0.166484	0.405442	0.36491	-0.0731563	0.0838448	-0.0509287	0.134129	0.0263292	-0.0936143	0.236284
[M].iEIMLPVFDAPQNLVEQAk.[L]	P06169	PDC1	0.347046	0.236828	-0.114496	-0.216576	0.222107	-0.013208	0.25687	-0.0473732	-0.196228	0.14925
[M].iEIMLPVFDAPQNLVEQAkLTAATNAkQ.[-]	P06169	PDC1	0.307616	#N/A	0.0867151	#N/A	0.015673	#N/A	0.040101	#N/A	-0.0798287	#N/A		#N/A		#N/A		#N/A		#N/A		#N/A
[S].aNISETTAMITDIATAPAEIDR.[C]	P06169	PDC1	0.966503	0	0.40254	0	-0.0488817	-1.05404	0.472078	-0.750975	-0.163932	0	>3 sigma					<-3 sigma
[I].mLPVFDAPQNLVEQAk.[L]	P06169	PDC1	-0.708699	#N/A	0.183521	#N/A	0.0885724	#N/A	0.207718	#N/A	-0.458185	#N/A		#N/A		#N/A		#N/A		#N/A		#N/A
[L].tAATNAkQ.[-]	P06169	PDC1	-0.0360041	0.0990708	-0.0554704	-0.0619612	0.165136	0.0252951	0.0867876	0.122362	-0.155316	0.147852
[A].lVkDAkNPVILADAccSR.[H]	P06169	PDC1	-0.0761918	0.732618	0.0247498	-0.134911	0.0680779	0.0449172	0.411512	0.16673	-0.298017	0.135886
[R].mSANISETTAm.[I]	P06169	PDC1	0.0206756	0.211689	-0.0864373	-0.172246	0.106989	0.00425445	0.144345	-0.0351735	-0.134035	0.0231957
[K].lIHGPkAQYNE.[I]	P06169	PDC1	0.0762816	0.12189	-0.0512741	0.00490157	0.0976527	0.176286	0.203244	0.14331	-0.190908	-0.0418588
[K].lLQTPIDMSLkPnDAESEkEVIDT.[I]	P06169	PDC1	2.03504	1.14327	0.0978541	0.238283	0.102918	0.0161053	0.173721	0.108817	-0.105303	-0.253633	>3 sigma	>3 sigma									Yes
[K].lLQTPIDMSLkPN.[D]	P06169	PDC1	0.822001	#N/A	0.386196	#N/A	0.0546022	#N/A	0.10751	#N/A	-0.235525	#N/A		#N/A		#N/A		#N/A		#N/A		#N/A
[K].lLTTIADAAkGYkPVAVPAR.[T]	P06169	PDC1	0.388759	0.0340722	-0.218344	0.44218	0.272894	0.193389	0.0860293	0.240304	-0.0873186	-0.0936101
[N].iVEFHSDHMk.[I]	P06169	PDC1	0.160867	0.380575	-0.0640859	-0.0835514	0.250829	0.00676628	0.211694	0.115271	0.0177426	0.157441
[D].iATAPAEIDR.[C]	P06169	PDC1	-0.334077	0.27287	0.00948676	0.0442558	0.144731	-0.046339	0.0887694	0.0606267	-0.107256	0.2574
[K].lTQDkSFnDNSkIR.[M]	P06169	PDC1	0.252222	0.296793	-0.0361228	-0.160869	-0.0306889	-0.050516	0.190327	0.0792391	-0.17378	0.113152
[N].iVEFHSDHMkIR.[N]	P06169	PDC1	0.352618	0.147277	-0.00157224	-0.0932463	0.00841802	-0.0340675	0.157104	0.151237	-0.0510456	0.00986007
[K].lTQDkSFNDnSk.[I]	P06169	PDC1	0.221684	0.223793	0.0166572	-0.128587	0.151078	0.188668	0.169414	-0.0112771	-0.371816	0.187233
[S].fnDnSkIR.[M]	P06169	PDC1	0.19719	0.246961	-0.0564192	-0.150966	0.204084	0.110718	0.198562	0.0867516	-0.112253	0.221959
[A].yAADGYAR.[I]	P06169	PDC1	-0.145388	0.118178	-0.0555022	-0.0251228	0.14557	0.0886319	0.148509	0.0271995	-0.0178742	-0.0335614
[K].lIDLTQFPA.[F]	P06169	PDC1	-0.868866	0.551143	-0.153001	-0.0720552	0.248618	0.154918	0.41497	0.00121799	0.165056	0.109055	<-3 sigma
[K].lLQTPIDmS.[L]	P06169	PDC1	0.00698831	0.568026	-0.0322309	0.0146032	0.185497	0.0760881	0.192302	0.0686171	-0.153935	-0.0040729
[SA].iDEQHPR.[Y]	P06169	PDC1	-0.163144	0.252305	0.0949328	0.0042114	0.133924	0.104331	0.130261	-0.318289	-0.225061	-0.113776
[K].lIDLTQFPAF.[V]	P06169	PDC1	-1.03672	1.24276	-0.235383	0.1195	0.285521	0.0573397	0.18175	-0.216369	-0.0406415	0.623875	<-3 sigma	>3 sigma
[K].lIHGPkAQYNEIQGWDHLS.[L]	P06169	PDC1	0.725009	#N/A	0.262545	#N/A	0.22613	#N/A	0.593637	#N/A	0.402294	#N/A		#N/A		#N/A		#N/A		#N/A		#N/A
[K].fVLQkLLTT.[I]	P06169	PDC1	0.559795	#N/A	-0.428123	#N/A	0.232804	#N/A	0.0885537	#N/A	0.0450939	#N/A		#N/A		#N/A		#N/A		#N/A		#N/A
[E].fHSDHMk.[I]	P06169	PDC1	0.101759	0.0470692	0.0917182	-0.00435448	0.24344	0.128321	0.191783	-0.106123	0.354608	-0.702673
[Y].aADGYAR.[I]	P06169	PDC1	-0.181188	0.178939	0.0147511	0.0334422	0.0457776	0.0872957	0.135029	0.147474	0.223647	0.133387
[T].aATNAkQ.[-]	P06169	PDC1	-0.0464224	0.132693	-0.115074	0.0166094	0.224465	0.136996	0.235771	0.0535908	-0.108842	0.159899
[K].lIDLTQF.[P]	P06169	PDC1	0	#N/A	0	#N/A	1.32647	#N/A	-0.249562	#N/A	0.611564	#N/A		#N/A		#N/A	>3 sigma	#N/A		#N/A		#N/A
[T].lGkYLFER.[L]	P06169	PDC1	-1.63567	0.648598	0.170183	0.123981	0.304266	0.174848	0.169579	-0.0882552	0.148728	0.270771	<-3 sigma
[E].fHSDHMkIR.[N]	P06169	PDC1	0	-0.288381	0.554367	-0.0300009	0.0607621	-0.00403973	0.332327	0.516345	-0.0458593	-0.0300077
[H].fSnDRVDIIAnDQGNR.[T]	P10592	SSA2	0.153328	0.281556	0.0492724	-0.0122032	0.0961881	0.179501	0.17029	0.0927018	-0.14151	0.041503
[Q].aAMNPANTVFDAkR.[L]	P10592	SSA2	0.0511071	0.304169	0.0163356	0.0640795	0.108221	0.108052	0.271009	0.0812114	-0.177505	0.00522303
[R].lIGDAAkNQAAMNPANT.[V]	P10592	SSA2	0.0794788	#N/A	0.00207991	#N/A	0.0506954	#N/A	0.35663	#N/A	0.0462343	#N/A		#N/A		#N/A		#N/A		#N/A		#N/A
[G].iLNVSAVEkGTGkSNk.[I]	P10591	SSA1	0.475681	0.346037	-0.168001	-0.00793081	0.38051	0.102785	0.263191	0.241521	-0.241205	0.0106529
[A].aMNPANTVFDAkR.[L]	P10592	SSA2	0.124488	#N/A	-0.0286985	#N/A	0.117208	#N/A	0.120024	#N/A	-0.0370244	#N/A		#N/A		#N/A		#N/A		#N/A		#N/A
[L].iGDAAknQAAmNPANTVFDAkR.[L]	P10592	SSA2	0.132953	0.587961	0.0721909	0.0347731	0.157162	0.0713676	0.204932	0.0750043	-0.201988	0.0173747
[L].lSIEDGIFEVkATAGDTHLGGEDFDNR.[L]	P10591	SSA1	-0.184738	1.91851	0.065753	0.34349	0.160109	0.0253786	0.148918	-0.160008	-0.194874	0.0658814		>3 sigma
[K].lVTDYFnGkEPNRS.[I]	P10591	SSA1	0.0968226	0.246369	0.0428689	0.0738066	0.194548	0.127632	0.179997	0.0400179	-0.230132	0.0241431
[K].lVTDYFnGkEPNR.[S]	P10591	SSA1	-0.0775829	0.354426	0.124961	-0.0803653	-0.0567877	0.0737567	0.174589	0.0528371	-0.152023	0.097508
[S].fVGFTDTER.[L]	P10592	SSA2	-0.240621	0.137131	0	-0.169795	-0.569928	-0.0795857	0.0296445	0.0135334	-0.161788	0.230614
[E].lSGIPPAPR.[G]	P10591	SSA1	0.0420402	0.21632	0.0171365	-0.0348198	0.187475	0.0619838	0.152698	0.0204614	-0.171999	0.105245
[L].vTDYFnGkEPNR.[S]	P10591	SSA1	0.335851	0.312018	-0.122099	-0.328508	0.033199	-0.0489911	0.161135	0.231752	-0.206481	0.22556
[Y].aDNQPGVLIQVFEGER.[AT]	P10591	SSA1	0.32888	-0.245671	-0.429834	0.817897	0.524961	-0.288034	0.221062	-0.420186	-0.590184	0.288602
[K].mVAEAEkFkEEDEkESQR.[I]	P10591	SSA1	-0.374472	-0.0586218	-0.0719846	0.159912	0.213747	0.107189	0.283108	-0.284829	-0.19823	0.181279
[R].IASkNQLESIAYS.[L]	P10591	SSA1	#N/A	0.290885	#N/A	-0.0994848	#N/A	-0.00522451	#N/A	0.0994351	#N/A	-0.0515194	#N/A		#N/A		#N/A		#N/A		#N/A
[GE].vANPIMSk.[FL]	P22202	SSA4	-0.134272	#N/A	-0.00182648	#N/A	-0.0365233	#N/A	0.340503	#N/A	-0.109958	#N/A		#N/A		#N/A		#N/A		#N/A		#N/A
[R].lVNHFIQEFkR.[K]	P10591	SSA1	-0.153894	0	-0.225256	-0.00131885	0.281862	0.256991	0.233445	-6.94326e-05	-0.320431	-0.00708679
[N].fNDPEVQGDMkHFPFk.[L]	P10592	SSA2	-0.153493	0.57671	-0.310724	-0.328644	0.165214	0.0276547	0.416538	0.0882216	-0.111458	0.127393
[Y].lGAkVNDAVVTVPAYFnDSQR.[Q]	P10591	SSA1	0.0984502	0.853397	0.0912779	-0.0319444	0.0255639	0.0190018	0.161527	0.120811	-0.248039	0.00457915
[K].lDkSQVDEIVLVGGSTR.[I]	P10591	SSA1	0.0280535	0.513673	0.0760181	-0.029595	0.191839	0.170927	0.173826	0.0370905	-0.132418	-0.0876615
[S].lGIETAGGVmTkLIPR.[N]	P10591	SSA1	0.292986	0.430041	-0.026565	-0.103347	0.198783	0.0624884	0.206275	0.0871649	-0.145728	0.0124106
[R].lIGDAAknQAAMNPANTVFDAkR.[L]	P10592	SSA2	0.305469	1.07301	-0.100212	0.00387566	0.169115	0.105541	0.221487	0.13694	-0.23483	0.119299		>3 sigma
[L].lGkFELSGIPPAPR.[G]	P10591	SSA1	0.393732	0.357908	0.0882978	-0.0289102	0.109149	-0.00605799	0.103241	0.0455303	-0.267472	-0.0043376
[T].fDVDSnGILNVSAVEkGTGkSNk.[I]	P10591	SSA1	0.399375	0.705202	-0.186035	-0.158635	0.22143	0.0090968	0.246825	0.0321784	-0.187017	-0.137884
[K].lIDVDGkPQIQVEFkGETkN.[F]	P10591	SSA1	0.358436	0.216576	0.237799	-0.0241919	0.281884	0.165049	0.275835	0.0009117	-0.203231	0.235499
[K].lYQAGGAPEGAAPGGFPGGAPPAPEAEGPTVEEVD.[-]	P10592	SSA2	-0.0449013	0.426845	0.305333	0.24069	-0.142022	-0.197528	0.10794	0.194527	-0.0664401	0.181922
[R].iINEPTAAAIAYG.[L]	P10591	SSA1	0.239733	2.08545	-0.0293151	-0.0426884	0.131037	0.182266	0.192086	0.0464319	-0.116748	-0.143639		>3 sigma
[K].lIDVDGkPQIQVE.[F]	P10591	SSA1	-0.0907447	0.275172	-0.0270384	-0.0154827	0.150505	0.115879	0.288693	-0.0297155	-0.0530124	0.0182423
[L].sIEDGIFEVkATAGDTHLGGEDFDNR.[L]	P10591	SSA1	-0.379455	-0.499871	0.0289425	-0.48705	0.114492	0.197477	0.195277	0.102135	-0.247603	-0.097393
[Q].aTkDAGTIAGLNVLR.[I]	P10591	SSA1	0.0970936	#N/A	-0.0309159	#N/A	-0.004199	#N/A	-0.0821429	#N/A	-0.323995	#N/A		#N/A		#N/A		#N/A		#N/A		#N/A
[K].lIDVDGkPQIQVEFkGETkNFTPEQ.[I]	P10591	SSA1	0.762795	#N/A	0.233568	#N/A	0.148985	#N/A	0.203264	#N/A	0.0681451	#N/A		#N/A		#N/A		#N/A		#N/A		#N/A
[T].lDPVEkVLR.[D]	P10591	SSA1	1.04635	0.86332	0.241241	-0.034632	0.135408	0.0867965	0.22948	0.108347	-0.210111	0.196782	>3 sigma
[TK].iAGLNVLR.[IV]	P10591	SSA1	-0.344395	1.08035	-0.247457	-0.0329772	-0.00715604	-0.235289	-0.0114378	-0.263749	-0.176339	-0.0286062		>3 sigma
[S].lGIETAGGVMTk.[L]	P10591	SSA1	0.128001	0.294755	-0.0301462	-0.0522706	0.0900035	0.0879088	0.135108	0.090613	-0.145811	0.078295
[K].lDkSQVDEIVL.[V]	P10591	SSA1	-0.314448	0.00748957	0.060293	0.571299	0.103873	0.341887	0.177173	0.490802	-0.322089	0.633245
[G].iETAGGVMTkLIPR.[N]	P10591	SSA1	0.334918	#N/A	-0.0181399	#N/A	0.0579729	#N/A	0.308149	#N/A	-0.207501	#N/A		#N/A		#N/A		#N/A		#N/A		#N/A
[R].LIGDAAkNQA.[A]	P10591	SSA1	0.0223347	#N/A	0.0363297	#N/A	-0.01655	#N/A	0.16178	#N/A	-0.22034	#N/A		#N/A		#N/A		#N/A		#N/A		#N/A
[DE].iIANDQGNR.[T]	P10591	SSA1	-0.15407	0.148147	0.0396979	-0.0403567	0.131918	0.132623	0.234902	-0.0250081	-0.140119	0.0135251
[N].vSAVEkGTGkSNk.[I]	P10591	SSA1	0.0980442	#N/A	-0.243396	#N/A	0.250139	#N/A	0.332951	#N/A	-0.081141	#N/A		#N/A		#N/A		#N/A		#N/A		#N/A
[K].aTAGDTHLGGEDFDNR.[L]	P10591	SSA1	0.0512595	0.165345	-0.111783	0.10617	-0.308361	-0.13007	0.0710224	0.0466264	-0.176397	0.0900838
[A].tAGDTHLGGEDFDNR.[L]	P10591	SSA1	0.167412	0.147725	-0.10203	0.0807623	0.222303	0.0785163	0.236992	0.248779	-0.0515003	-0.0656941
[E].vANPIMSkLYqAGGAPEGAAPGGFPGGAPPAPEAEGPTVEEVD.[-]	P10592	SSA2	0	0	0	0	-0.0744285	-1.1922	0.685374	-1.29487	-0.651127	-0.69074						<-3 sigma		<-3 sigma
[E].vFSTYADNQPGVLIQVFEGER.[TA]	P22202	SSA4	0.178313	#N/A	0.79355	#N/A	-0.0521223	#N/A	0.257022	#N/A	-0.242078	#N/A		#N/A		#N/A		#N/A		#N/A		#N/A
[S].lLSIEDGIFEVkATAGDTHLGGEDFDNR.[L]	P10591	SSA1	-0.0288509	#N/A	-0.136514	#N/A	0.211002	#N/A	0.408048	#N/A	-0.0408687	#N/A		#N/A		#N/A		#N/A		#N/A		#N/A
[P].lSLGIETAGGVMTkLIPR.[N]	P10591	SSA1	-0.0839568	#N/A	-0.490605	#N/A	-0.102667	#N/A	0.0463317	#N/A	-0.519589	#N/A		#N/A		#N/A		#N/A		#N/A		#N/A
[W].lDSNTTATkEEFDDQLkELQEVANPIMSk.[L]	P10592	SSA2	-0.643119	#N/A	-0.180935	#N/A	0.473855	#N/A	0.356649	#N/A	-0.658745	#N/A		#N/A		#N/A		#N/A		#N/A		#N/A
[E].vkATAGDTHLGGEDFDNR.[L]	P10591	SSA1	0.231568	0.52674	0.146433	-0.0074607	0.250505	0.0984971	0.221759	0.00229123	-0.107118	-0.146803
[N].lLGkFELSGIPPAPR.[G]	P10591	SSA1	0.127095	0.290333	-0.117248	-0.0035808	-0.115294	0.0858123	0.0673963	0.0466626	-0.265793	0.0410861
[R].lIGDAAkNQ.[AV]	P10591	SSA1	-0.0555331	0.0869516	-0.0551384	-0.042806	0.10528	0.0602099	0.226925	0.118823	-0.00151966	0.07421
[KS].iTITnDkGR.[L]	P10591	SSA1	0.120664	0.322571	-0.0792667	-0.0472705	0.206686	0.13981	0.250902	0.0909086	-0.122744	0.17242
[H].lGGEDFDNR.[L]	P10591	SSA1	-0.137623	0.13973	0.0166783	-0.0538916	0.145564	0.14826	0.225624	0.0746951	-0.0251622	-0.0535598
[F].sTYADNQPGVLIQVFEGER.[AT]	P10591	SSA1	1.63174	#N/A	-0.0876459	#N/A	0.2707	#N/A	0.266266	#N/A	0.0170373	#N/A	>3 sigma	#N/A		#N/A		#N/A		#N/A		#N/A
[L].lSIEDGIFEVk.[A]	P10591	SSA1	-0.485331	#N/A	-0.0606344	#N/A	-0.0867782	#N/A	0.0571069	#N/A	-0.384035	#N/A		#N/A		#N/A		#N/A		#N/A		#N/A
[F].vGFTDTER.[L]	P10592	SSA2	0.121147	0.430729	-0.115238	-0.0121562	-0.0865216	-0.0450147	0.119685	0.0396516	-0.0848386	0.131486
[R].LIGDAAkNQAA.[MLI]	P10591	SSA1	-0.0761489	-0.153728	-0.108774	0.0119443	0.0216273	0.0910594	0.0403343	-0.0156337	-0.00366708	0.0505452
[L].iQVFEGER.[AT]	P10591	SSA1	0.0557115	0.128466	-0.0583923	0.0971578	0.0818455	0.102472	0.213948	0.171152	-0.336458	0.0328511
[T].aGGVMTkLIPR.[N]	P10591	SSA1	0.428792	0.209454	-0.0367904	-0.0799921	0.239081	-0.107319	0.264986	-0.171336	-0.43191	0.0841677
[R].LSkEDIEkM.[V]	P10591	SSA1	0.173319	#N/A	0.00577011	#N/A	0.179868	#N/A	0.221127	#N/A	-0.0496138	#N/A		#N/A		#N/A		#N/A		#N/A		#N/A
[R].lSkEDIEkMVAEAEk.[F]	P10591	SSA1	0.761649	#N/A	-0.107318	#N/A	-0.0812828	#N/A	0.672803	#N/A	-0.501828	#N/A		#N/A		#N/A		#N/A		#N/A		#N/A
[T].aGDTHLGGEDFDNR.[L]	P10591	SSA1	0.0902935	#N/A	-0.0930339	#N/A	0.0247055	#N/A	0.237582	#N/A	-0.0643969	#N/A		#N/A		#N/A		#N/A		#N/A		#N/A
[T].iTnDkGR.[L]	P10591	SSA1	0.160916	0.324963	0.0149284	-0.0791414	0.199507	0.0712022	0.266048	0.112616	-0.127064	0.179604
[K].lIDVDGkPQ.[I]	P10591	SSA1	0.0471661	#N/A	-0.103944	#N/A	0.248432	#N/A	-0.156373	#N/A	0.274082	#N/A		#N/A		#N/A		#N/A		#N/A		#N/A
[H].fIQEFkR.[K]	P10591	SSA1	0.0985671	0.247668	0.14617	-0.0741629	0.0526066	0.0579907	0.187409	0.108203	-0.0489822	0.282891
[R].IASknQLES.[I]	P10591	SSA1	#N/A	0.401504	#N/A	-0.026363	#N/A	0.0317936	#N/A	0.0966834	#N/A	0.133045	#N/A		#N/A		#N/A		#N/A		#N/A
[A].vEkGTGkSNk.[I]	P10591	SSA1	0.13291	-0.00308633	-0.131283	-0.0337026	-0.0129861	0.148088	0.0775133	0.0942827	-0.487741	-0.213331
[R].iINEPTAAA.[I]	P10591	SSA1	0.0367624	0.239952	-0.0213702	-0.0885513	0.040893	0.0924235	0.25575	0.20613	-0.0596999	0.0784684
[T].aGGVMTk.[L]	P10591	SSA1	0.123774	#N/A	-0.0257411	#N/A	-0.0538257	#N/A	0.16797	#N/A	-0.114076	#N/A		#N/A		#N/A		#N/A		#N/A		#N/A
[F].iQEFkR.[K]	P10591	SSA1	-0.228296	0.176995	0.128023	-0.256696	0.0766327	0.173056	0.137012	0.124313	-0.118112	0.132504
[E].lcADLFR.[S]	P10591	SSA1	0	#N/A	0.238245	#N/A	-0.396668	#N/A	-0.00652691	#N/A	-0.0286735	#N/A		#N/A		#N/A		#N/A		#N/A		#N/A
[YF].fnGkEPNR.[S]	P10591	SSA1	-0.0782765	-0.694085	0.103168	0.206217	0.0860673	-0.169111	0.299309	-0.0668421	-0.311711	1.13252										>3 sigma
[H].iIVDGkkIATYQER.[D]	P00359	TDH3	-0.13935	0.312913	0.183151	0.0230956	0.0297087	-0.00673615	0.180979	0.10046	-0.274757	0.0340231
[L].vSWYDnEYGYSTR.[V]	P00359	TDH3	0.258747	0.726823	-0.0135697	0.0518183	0.118561	-0.0161395	0.220174	0.101113	-0.159004	0.0770503
[V].vDLVEHVAkA.[-]	P00359	TDH3	0.25521	-0.0392067	0.128709	0.0204952	0.030273	-0.113607	0.156699	0.049712	-0.336038	-0.151368
[A].vGkVLPELQGkLTGmAFR.[V]	P00360	TDH1	-0.0391997	-0.37316	-0.0465605	-0.131874	0.0907016	-0.00101996	0.0510469	0.102972	-0.187598	0.0386199
[T].vDVSVVDLTVk.[L]	P00360	TDH1	-0.0483517	0.116439	-0.159209	-0.134771	0.13115	0.178534	0.215955	0.237508	-0.0697041	0.19812
[F].vMGVNEEkYTSDLk.[I]	P00359	TDH3	0.472743	0.554022	0.0373	-0.00767096	0.098934	0.0646733	0.253704	0.254258	-0.1003	-0.0164783
[K].vVkAAAEGkLkG.[V]	P00359	TDH3	0.182963	1.23905	-0.0261773	-0.208952	0.117602	-0.0214962	0.37139	0.203957	-0.101907	0.294339		>3 sigma
[R].tASGNIIPSSTGAAkA.[V]	P00360	TDH1	0.0542845	#N/A	-0.00286282	#N/A	-0.026343	#N/A	0.147028	#N/A	-0.126365	#N/A		#N/A		#N/A		#N/A		#N/A		#N/A
[K].lNkETTYDEIkk.[V]	P00359	TDH3	0.238401	0.38244	0.0927719	-0.0775413	0.0784445	0.0556481	0.371334	0.179731	-0.116832	-0.157492
[G].vnEEkYTSDLk.[I]	P00359	TDH3	0.17931	0.405639	0.011861	-0.0890769	0.132952	0.0356333	0.385598	0.168262	-0.0833735	0.0104483
[T].aSGNIIPSSTGAAk.[A]	P00360	TDH1	0.0910335	0.45234	0.098112	0.119418	0.159563	-0.0780314	0.220699	-0.130511	-0.023445	0.174991
[A].lSRPNVEVVALNDPFITnDYAAYmFkYDSTHGR.[Y]	P00359	TDH3	-0.418664	#N/A	0.677323	#N/A	-0.261728	#N/A	-0.0236731	#N/A	-0.0337386	#N/A		#N/A		#N/A		#N/A		#N/A		#N/A
[N].iIPSSTGAAkAVGkVLPELQGk.[L]	P00360	TDH1	-0.123604	1.5343	0.417622	-0.337204	0.10009	0.327576	0.302278	0.137544	-0.327828	0.457922		>3 sigma
[M].fVMGVNEEkYTSDLk.[I]	P00359	TDH3	-0.106493	0.322243	-0.00264978	-0.0363274	0.184735	-0.0539319	0.325494	0.19457	-0.227326	-0.0710724
[K].iVSnAScTTNc.[L]	P00360	TDH1	0.0950414	0.294699	0.00173338	-0.0510369	0.0176194	-0.0327744	0.275748	0.238662	-0.216708	-0.10374
[F].vkLVSWYDNEYGYSTR.[V]	P00359	TDH3	-0.155627	0.258997	-0.000649994	-0.00307066	0.0541009	-0.0522784	0.212226	0.0640884	-0.206128	0.0686267
[K].vINDAFGIEEG.[L]	P00360	TDH1	0.152813	0.308323	0.00229866	0.0623371	0.0348662	0.0205519	0.296503	0.0728075	-0.191989	-0.0503584
[K].iATYQERDPANLPWGSSNVD.[I]	P00359	TDH3	-0.14941	0.520076	-0.239518	-0.125587	0.206036	-0.17406	0.371836	0.0825266	-0.193868	-0.162543
[K].kVVITAPSSTAPMF.[V]	P00359	TDH3	0.324548	#N/A	0.230451	#N/A	0.184816	#N/A	0.783357	#N/A	0.593043	#N/A		#N/A		#N/A		#N/A		#N/A		#N/A
[K].vVITAPSSTAPM.[F]	P00359	TDH3	-0.0943161	0.0883965	0.135133	0.108829	0.0674025	0.0220552	0.249568	0.0601488	-0.1238	-0.138174
[R].vVDLVEHVAkA.[-]	P00359	TDH3	0.421641	0.457903	-0.0791502	-0.0898068	0.0304532	-0.0182464	0.106432	0.168571	-0.254511	0.0593669
[K].lVSWYDnEYGYSTR.[V]	P00359	TDH3	0.33193	0.202516	-0.0619002	-0.0573286	0.0536639	0.00343721	0.21751	0.104845	-0.162822	-0.0397332
[K].vVITAPSSTAPmF.[V]	P00359	TDH3	0.292717	0.187202	0.0102539	-0.224906	0.0682046	0.145633	0.093071	0.026166	-0.0465756	0.0429216
[K].aVGkVLPELQGkLTGmA.[F]	P00360	TDH1	0.130044	0.415599	0.0937658	-0.106121	0.154624	-0.322811	0.184024	0.387689	-0.135527	0.286007
[A].vGkVLPELQGk.[L]	P00360	TDH1	0.535805	0.775316	-0.0975224	-0.0746867	0.0852754	-0.0101794	0.238239	0.151477	-0.156659	0.105208
[K].aVGkVLPELQGk.[L]	P00360	TDH1	0.272244	0.405996	-0.061722	0.00600291	0.043238	0.0863515	0.239808	0.143612	-0.112783	0.0241065
[S].iFDASAGIQLSPk.[F]	P00360	TDH1	0.442625	0.302886	0.31931	-0.192936	0.194337	-0.256421	0.431212	-0.202616	-0.731415	-1.30378										<-3 sigma
[F].rVPTVDVSVVDLTVk.[L]	P00360	TDH1	-0.222468	#N/A	-0.162696	#N/A	-0.0332351	#N/A	0.159614	#N/A	-0.253435	#N/A		#N/A		#N/A		#N/A		#N/A		#N/A
[K].iATYQERDPANLPWGSSN.[V]	P00359	TDH3	0.184652	#N/A	-0.07887	#N/A	0.388461	#N/A	0.051359	#N/A	-0.120438	#N/A		#N/A		#N/A		#N/A		#N/A		#N/A
[R].iALSRPNVEVVALNDPFITN.[D]	P00359	TDH3	1.41805	#N/A	0.738946	#N/A	-0.154878	#N/A	0.383428	#N/A	-0.326112	#N/A	>3 sigma	#N/A		#N/A		#N/A		#N/A		#N/A
[K].iATYQERDPANLPWGSSNVDIAIDSTGVFkELDTAQkH.[I]	P00359	TDH3	0	#N/A	-0.010219	#N/A	-0.517299	#N/A	0.545186	#N/A	-0.176462	#N/A		#N/A		#N/A		#N/A		#N/A		#N/A
[T].vDGPSHkDWR.[G]	P00360	TDH1	-0.0412308	0.233585	-0.18405	-0.160366	-0.0650175	-0.0351695	0.194767	0.157415	-0.126712	0.109017
[K].vInDAFGIEEGLMTTVHS.[ML]	P00360	TDH1	0.245999	0.346319	0.14946	-0.271372	0.117607	-0.0188973	0.160634	0.103636	-0.0942379	0.0885749
[M].fkYDSTHGR.[Y]	P00359	TDH3	0.221566	-0.109975	0.151317	0.118587	0.024575	0.0452518	0.198816	0.15258	-0.100264	0.254004
[Y].mFkYDSTHGR.[Y]	P00359	TDH3	0.541816	0.84767	-0.235302	-0.139457	-0.0303947	0.0148853	0.18031	0.142621	-0.19532	0.115819
[K].vLPELQGkLTGMAFR.[V]	P00360	TDH1	0.136728	0.339801	0.15607	0.234679	0.1455	0.0347332	0.0849863	-0.0416758	-0.138273	0.0575741
[W].yDnEYGYSTR.[V]	P00359	TDH3	0.163848	0.242176	-0.109498	-0.203305	0.178231	-0.233718	0.152199	0.131921	-0.123545	-0.25837
[K].iATYQERDPANLPWGSSNVDIAIDSTGVFkE.[L]	P00359	TDH3	0.996699	#N/A	-0.0710062	#N/A	-0.444783	#N/A	0.11057	#N/A	-0.747056	#N/A	>3 sigma	#N/A		#N/A		#N/A		#N/A		#N/A
[R].iALSRPNVEVVALNDPF.[I]	P00359	TDH3	-1.00069	1.49702	-0.107302	-0.318741	0.0821538	0.414661	0.124953	0.0446078	-0.231178	0.182904	<-3 sigma	>3 sigma
[ML].tATQkTVDGPSHkDWR.[G]	P00360	TDH1	-0.0581636	0.922464	0.104015	0	0.116128	-0.131495	0.305244	0.0398318	-0.222494	0.3728
[R].iALSRPNVEVVALNDPFITNDYAAY.[M]	P00359	TDH3	0.97117	1.01721	-0.342604	-0.513193	0.286084	1.09878	-0.129885	0.192592	0.0804936	-0.136446	>3 sigma	>3 sigma				>3 sigma					Yes
[R].YAGEVSHDDkH.[I]	P00359	TDH3	0.109508	0.320727	-0.0526738	0.000327785	-0.0766883	-0.00948096	0.179711	0.169478	-0.041967	0.158865
[F].vkLVSWYDNEYGYSTRVVDLVEHVAkA.[-]	P00359	TDH3	0	#N/A	0	#N/A	-0.77349	#N/A	0.697416	#N/A	-0.0869829	#N/A		#N/A		#N/A		#N/A		#N/A		#N/A
[K].vINDAFGIEEGLMTT.[V]	P00360	TDH1	1.05611	0	0.361113	-0.503671	0.0759041	0	-0.075052	0.167374	-0.322415	0	>3 sigma
[R].iALSRPNVEVVALNDPFITNDYAAYM.[F]	P00359	TDH3	-0.119806	#N/A	-0.144307	#N/A	-0.0418937	#N/A	0.0522194	#N/A	-0.172329	#N/A		#N/A		#N/A		#N/A		#N/A		#N/A
[K].TVDGPSHkDWR.[G]	P00360	TDH1	#N/A	-0.027643	#N/A	0.31094	#N/A	-0.202932	#N/A	-0.610675	#N/A	0.354086	#N/A		#N/A		#N/A		#N/A		#N/A
[K].vVITAPSSTAPMFVMG.[V]	P00359	TDH3	1.05425	#N/A	-0.00412757	#N/A	0.164383	#N/A	0.179563	#N/A	-0.160702	#N/A	>3 sigma	#N/A		#N/A		#N/A		#N/A		#N/A
[L].vSWYDNEYGYSTRVVDLVEHVAkA.[-]	P00359	TDH3	0	#N/A	0.336745	#N/A	-0.351324	#N/A	0.130175	#N/A	-0.493159	#N/A		#N/A		#N/A		#N/A		#N/A		#N/A
[S].lTATQkTVDGPSHkDWR.[G]	P00359	TDH3	0.104464	0.106855	-0.520301	0.0429535	0.122978	-0.0723939	0.161305	0.12821	-0.320103	-0.0401096
[S].iFDASAGIQLSPkFVk.[L]	P00360	TDH1	0	#N/A	0	#N/A	0.201294	#N/A	0.119185	#N/A	-0.277544	#N/A		#N/A		#N/A		#N/A		#N/A		#N/A
[K].aVGkVLPELQGkLTGMAFR.[V]	P00360	TDH1	0.257457	0.667105	0.174115	-1.05855	-0.100231	-0.137087	0.0422775	0.057474	-0.170435	-0.0461215				<-3 sigma
[K].vVkAAAEGk.[L]	P00359	TDH3	-0.00159488	0.302393	-0.120424	-0.140343	0.126349	0.0459895	0.353125	0.106857	0.0575884	-0.0790228
[V].sWYDNEYGYSTR.[V]	P00359	TDH3	0.62461	-0.458774	-0.230525	-0.69828	0.187818	0.123842	0.0629844	0.00468066	-0.161837	-0.0171873
[K].iVSNAScTTN.[C]	P00360	TDH1	-0.110281	0.488606	0.0462184	0.0425264	-0.0315306	0.00977123	0.352773	-0.121686	-0.0639568	-0.148499
[K].lNkETTYDEIkkV.[V]	P00359	TDH3	0.259631	0.377307	0.0917578	0.173177	0.0283092	0.017697	0.396264	-0.0575302	-0.174222	-0.154245
[K].vLPELQGkLTGM.[A]	P00360	TDH1	0	#N/A	0	#N/A	0.0757177	#N/A	0.114536	#N/A	-1.21812	#N/A		#N/A		#N/A		#N/A		#N/A	<-3 sigma	#N/A
[L].nkETTYDEIkk.[V]	P00359	TDH3	0.520178	0	0.059715	0.151811	0.0829243	-0.133645	0.462624	0.139442	-0.526432	0.0188914
[K].vLPELQGk.[L]	P00360	TDH1	0.073002	0.322063	-0.280835	-0.0192292	-0.00587613	0.0342937	0.404285	-0.0111086	-0.0596251	0.0336501
[R].tASGNIIPSSTGAAkAVGkVLPELQGkLTGMAFR.[V]	P00360	TDH1	0	#N/A	-1.50777	#N/A	-0.945323	#N/A	-0.0121839	#N/A	-0.529082	#N/A		#N/A	<-3 sigma	#N/A	<-3 sigma	#N/A		#N/A		#N/A	Yes
[R].iALSRPNVEVVA.[L]	P00359	TDH3	0.154935	0.188617	0.0787939	-0.130951	0.07866	0.0477483	0.13361	0.0190826	-0.0584695	0.129761
[K].aVGkVLPELQGkLTGM.[A]	P00360	TDH1	0.533299	#N/A	0.174515	#N/A	0.0151674	#N/A	0.150415	#N/A	-0.190423	#N/A		#N/A		#N/A		#N/A		#N/A		#N/A
[D].lVEHVAkA.[-]	P00359	TDH3	0.110733	0.293808	0.0108913	-0.0828156	0.00154662	-0.0631244	0.181291	0.0782607	-0.184631	0.115439
[K].aAAEGkLkGVLGY.[T]	P00359	TDH3	-0.0231943	#N/A	0.0315874	#N/A	0.0992453	#N/A	0.190956	#N/A	-0.452219	#N/A		#N/A		#N/A		#N/A		#N/A		#N/A
[K].aAAEGkLkG.[V]	P00359	TDH3	0.423155	-1.32518	-0.0356618	0.0632738	-0.0558699	0.0511011	0.27554	0.28796	-0.0512514	-0.0204912		<-3 sigma
[E].lQGkLTGMAFR.[V]	P00360	TDH1	0.294623	0.166725	0.106293	-0.0696427	-0.0369877	-0.0835595	0.113601	0.149899	-0.106468	0.251789
[K].iATYQERD.[P]	P00360	TDH1	0.520671	0.391464	0.151387	-0.10538	0.0767783	0.0674457	0.223743	-0.101006	-0.0886075	-0.0438647
[VF].kYDSTHGR.[Y]	P00360	TDH1	0.410632	0.672613	0.0804262	0.231937	0.0687161	-0.117348	0.267245	0.0487737	-0.536469	-0.126379
[S].vVDLTVkLNkETTYDEIkk.[V]	P00359	TDH3	0.541049	#N/A	0.596999	#N/A	0.463569	#N/A	0.346403	#N/A	-0.299789	#N/A		#N/A		#N/A		#N/A		#N/A		#N/A
[H].iIVDGkk.[I]	P00359	TDH3	-0.0571416	0.239687	-0.0550306	-0.0694511	-0.0151883	-0.127588	0.298775	0.115486	-0.116966	0.146027
[K].iATYQER.[D]	P00360	TDH1	0.134091	0.295888	0.0110805	-0.00907174	-0.00854341	-0.0906609	0.243774	0.12766	-0.142937	0.0539314
[D].lTVkLNkETTYDEIkk.[V]	P00359	TDH3	0.85479	#N/A	-0.0726321	#N/A	0.272405	#N/A	0.365052	#N/A	-0.127967	#N/A		#N/A		#N/A		#N/A		#N/A		#N/A
[L].vEHVAkA.[-]	P00359	TDH3	0.50108	1.16107	-0.116325	-0.0115472	-0.0404863	-0.142237	0.150089	0.0213541	-0.465124	-0.2086		>3 sigma
[S].vVDLTVk.[L]	P00360	TDH1	0.0641361	0.139836	-0.129638	-0.157228	-0.0162471	-0.00754417	0.232182	0.208689	-0.0888553	0.16746
[R].iALSRPNVEVVAL.[N]	P00359	TDH3	-0.280185	0.349483	-0.0547933	-0.575573	-0.171685	-0.0129327	0.113091	0.199736	-0.276103	-0.139372
[K].iATYQERDPANLPWGSSNVDI.[A]	P00359	TDH3	-0.0417886	#N/A	0.438572	#N/A	0.0329678	#N/A	-0.0849726	#N/A	-0.302613	#N/A		#N/A		#N/A		#N/A		#N/A		#N/A
[R].iALSRPNVE.[V]	P00359	TDH3	0.0906126	#N/A	-0.0320916	#N/A	-0.0414856	#N/A	0.194381	#N/A	-0.165835	#N/A		#N/A		#N/A		#N/A		#N/A		#N/A
[K].lTGMAFR.[V]	P00360	TDH1	-0.00582384	0.936662	-0.0338565	-0.178239	0.000930659	-0.0921782	0.170612	0.137577	-0.0983697	0.38838
[M].gVnEEkYTSDLk.[I]	P00359	TDH3	0.0440238	0.180938	0.00355592	-0.0108475	0.113957	0.0662058	0.315412	0.348087	-0.199287	0.195179
[K].vInDAF.[G]	P00360	TDH1	0	#N/A	0	#N/A	0	#N/A	0.732402	#N/A	0	#N/A		#N/A		#N/A		#N/A		#N/A		#N/A
[H].sLTATQkTVDGPSHkDWR.[G]	P00359	TDH3	-0.124813	0.659827	0.147501	-0.245946	0.0713468	-0.133242	0.440609	0.0606608	-0.441223	-0.0608254
[H].iDAGAkk.[V]	P00360	TDH1	-0.12157	-0.158617	-0.0462707	-0.126022	-0.033114	0.00871402	0.309137	0.224064	-0.0479296	0.00919446
[S].iVPSGASTGVHEALEMR.[D]	P00924	ENO1	0.17368	0.311272	-0.174235	-0.107095	0.0908055	0.0532555	0.223511	0.0279281	-0.174411	0.0851557
[R].IATAIEkkAADAL.[L]	P00924	ENO1	0.1005	0.375678	-0.0450253	-0.11707	0.114869	0.0510704	0.247761	0.120473	-0.131341	0.0767252
[R].iGSEVYHnLkS.[L]	P00924	ENO1	0.27823	0.347521	0.0908804	-0.0379937	0.225307	-0.0402924	0.103488	0.0372129	-0.181849	0.0390196
[I].qIVADDLTVTNPAR.[I]	P00925	ENO2	0.257388	0.921287	0.388463	-0.706545	0.0431793	-0.270504	0.174662	0.122086	-0.541411	-0.399161
[Q].iVADDLTVTNPAR.[I]	P00925	ENO2	-0.0434587	0.618798	-0.0698012	-0.159162	-0.10234	0.0372923	0.184914	0.0814735	0.017742	-0.029559
[R].aAAAEkNVPLYQHLAD.[L]	P00925	ENO2	0.199648	#N/A	0.0128351	#N/A	0.0911031	#N/A	0.109601	#N/A	-0.154459	#N/A		#N/A		#N/A		#N/A		#N/A		#N/A
[M].iAPTGAkTFAEAMR.[I]	P00925	ENO2	0.0244602	0.443681	0.121507	0.0722303	-0.192245	-0.0626592	0.0241185	0.0240132	-0.214873	-0.0321564
[F].lLSLDGTANkSk.[L]	P00925	ENO2	0.0418214	#N/A	-0.00120994	#N/A	0.261266	#N/A	0.315299	#N/A	-0.042779	#N/A		#N/A		#N/A		#N/A		#N/A		#N/A
[R].IATAIEkkAADALLLkVNQ.[I]	P00924	ENO1	-0.120978	0.72891	-0.190223	-0.138747	-0.11862	0.0922135	0.143346	0.112885	-0.234133	-0.00968341
[R].IATAIEkkAADALLLkVN.[Q]	P00924	ENO1	0.577788	#N/A	0.112692	#N/A	0.0579053	#N/A	0.10436	#N/A	-0.251983	#N/A		#N/A		#N/A		#N/A		#N/A		#N/A
[A].vYAGEnFHHGDkL.[-]	P00925	ENO2	0.126785	0.370774	-0.0452748	-0.0648105	0.0884019	0.0905933	0.352363	0.152872	-0.125901	0.0816319
[R].iATAIEkk.[A]	P00924	ENO1	0.136773	0.0307611	0.000884222	-0.132105	0.0419242	0.0609012	0.202192	0.109507	-0.119855	0.105916
[R].IATAIEkkAADALLLkVnQIGT.[L]	P00924	ENO1	0.481134	#N/A	0.280623	#N/A	0.0351944	#N/A	0.128389	#N/A	-0.118693	#N/A		#N/A		#N/A		#N/A		#N/A		#N/A
[F].fkTAGIQIVADDLTVTNPAR.[I]	P00925	ENO2	0.28052	0.861798	0.0580746	-0.341819	-0.00941275	0.0722341	0.102038	0.181479	-0.199389	-0.051044
[F].iADLVVGLR.[CT]	P00924	ENO1	0.165024	0.508234	-0.141971	-0.159199	-0.347435	-0.146714	0.0337075	-0.00148948	-0.0917557	0.0958016
[R].iATAIEkkA.[A]	P00924	ENO1	2.70603	0.210796	-0.0834776	-0.0653795	0.123635	0.0929311	0.293867	0.179763	-0.15197	-0.925636	>3 sigma									<-3 sigma
[K].vNQIGTLSESIkAAQDS.[F]	P00924	ENO1	0.443814	#N/A	-0.433737	#N/A	0.244507	#N/A	0.200653	#N/A	0.0244739	#N/A		#N/A		#N/A		#N/A		#N/A		#N/A
[T].aGIQIVADDLTVTNPAR.[I]	P00925	ENO2	-0.0132399	0.0725483	-0.050074	-0.109065	0.0376058	0.109105	0.1229	0.133366	-0.168447	-0.0978796
[S].lDGTANkSkLGAnAILGVSMAAAR.[A]	P00925	ENO2	0.166728	0.377007	-0.109305	-0.0219154	0.264898	-0.0453576	0.117221	0.0178439	-0.353723	0.0919594
[G].iQIVADDLTVTNPAR.[I]	P00925	ENO2	0.454133	0.440196	0.2097	0.0452755	0.0455407	-0.0105799	0.15797	0.0486223	-0.160115	0.0531192
[R].IATAIEkkAADALL.[L]	P00924	ENO1	0.102058	1.48554	0.0586486	-0.0442663	0.0743915	0.230427	0.389632	0.747882	0.227193	0.780196		>3 sigma
[S].fAAnWGVMVSHR.[S]	P00925	ENO2	0.130625	-0.554491	-0.0689763	-0.0511277	0.0670882	0.296567	0.285499	0.107911	-0.11966	-0.166631
[W].lTGVELADMYHSLmkR.[Y]	P00925	ENO2	0	0	-0.231254	0	1.48025	0.414447	0.344965	0.42632	0.470323	-0.282687					>3 sigma
[A].gIQIVADDLTVTNPAR.[I]	P00925	ENO2	0.182312	0.168036	-0.0396783	0.199679	0.196054	-0.125924	0.209767	0.285818	-0.164641	-0.0719319
[R].IATAIEkkAADALLLk.[V]	P00924	ENO1	0.146948	0.674031	-0.123549	-0.0571681	0.0454678	-0.129344	0.258359	0.0778985	-0.181486	0.110151
[K].aADALLLkVNQ.[I]	P00924	ENO1	1.47261	0.632736	-0.0729762	-0.624198	0.160693	0.0269665	0.0877211	0.106361	-0.371242	0.0927929	>3 sigma
[A].iLGVSMAAAR.[A]	P00925	ENO2	0.466217	0.176613	-0.00416103	-0.00790378	-0.242018	-0.0434901	0.0381463	-0.0053193	-0.156297	0.0398904
[R].lAkLnQLLR.[I]	P00924	ENO1	0.349646	0.269999	-0.156144	-0.374074	0.251815	0.231344	0.0713075	0.0359778	-0.232723	0.0693403
[A].ikAAGHDGkVk.[I]	P00925	ENO2	0.133608	0.342068	0.298058	-0.115356	0.102316	0.144947	0.49119	-0.0357461	-0.108746	0.0117219
[H].fFkTAGIQIVADDLTVTNPAR.[I]	P00925	ENO2	-0.975675	#N/A	0.153129	#N/A	0.169954	#N/A	0.0209752	#N/A	-0.246017	#N/A	<-3 sigma	#N/A		#N/A		#N/A		#N/A		#N/A
[M].aVSkVYAR.[S]	P00924	ENO1	0.0600315	0.304	0.0313804	0.191406	-0.00582436	0.0894236	0.148698	0.0480518	-0.183012	0.00263991
[N].lDVkDQkAVDDFLLSLDGTANkSk.[L]	P00925	ENO2	0	#N/A	0.868318	#N/A	0.360248	#N/A	0.529681	#N/A	0.142697	#N/A		#N/A		#N/A		#N/A		#N/A		#N/A
[R].AAAAEkNVPLYQH.[L]	P00925	ENO2	0.145377	0.245892	0.0323874	-0.119544	0.0965997	-0.0209574	0.0967272	0.060735	-0.0327362	0.0499344
[S].lDGTANkSk.[L]	P00924	ENO1	0.218917	0.488458	0.102684	-0.144156	0.102635	0.0826051	0.448361	0.113218	-0.108524	0.0919418
[R].sGETEDTFIADLVVGLR.[T]	P00924	ENO1	-0.772316	0.376497	0.28024	-0.186357	-0.127179	0.367016	0.129511	-0.202565	-0.114199	-0.142101
[Q].iGTLSESIkAAQDSFAANWGVMVSHR.[S]	P00925	ENO2	0	#N/A	1.02162	#N/A	1.17024	#N/A	-0.00345371	#N/A	-0.333633	#N/A		#N/A	>3 sigma	#N/A	>3 sigma	#N/A		#N/A		#N/A	Yes
[A].lALQEFMIAPTGAkTFAEAMR.[I]	P00925	ENO2	0.492674	#N/A	0.213424	#N/A	0.0243756	#N/A	0.455259	#N/A	-0.311294	#N/A		#N/A		#N/A		#N/A		#N/A		#N/A
[R].IATAIEkkAADALLLkVNQIGTLSES.[I]	P00924	ENO1	-0.461309	#N/A	-0.495761	#N/A	0.0106029	#N/A	0.0782904	#N/A	-0.226945	#N/A		#N/A		#N/A		#N/A		#N/A		#N/A
[T].lSESIkAAQDSFAANWGVMVSHR.[S]	P00925	ENO2	-0.565231	#N/A	-0.105189	#N/A	0.11877	#N/A	-0.0777473	#N/A	-0.214095	#N/A		#N/A		#N/A		#N/A		#N/A		#N/A
[D].dLTVTNPAR.[I]	P00925	ENO2	0.293048	0.355998	0.0424399	-0.128564	3.18343e-05	0.0128827	0.256985	-0.02556	-0.268249	-0.0252788
[V].aDDLTVTNPAR.[I]	P00925	ENO2	0.213312	0.0439493	-0.0473407	-0.052108	0.108387	-0.0729107	0.197402	0.0325871	-0.323031	0.296361
[K].aADALLLkVNQIGT.[L]	P00924	ENO1	0.970888	#N/A	1.2616	#N/A	-0.135601	#N/A	0.169224	#N/A	-0.528865	#N/A	>3 sigma	#N/A	>3 sigma	#N/A		#N/A		#N/A		#N/A	Yes
[A].aGHDGkVk.[I]	P00925	ENO2	0.0420555	0.116125	0.150288	-0.121526	-0.0567158	0.110091	0.447764	0.186834	0.135979	-0.286068
[R].IATAIEkkAADA.[L]	P00924	ENO1	0.283068	0.348471	0.0677335	-0.0896151	0.12948	0.139707	0.404997	0.202819	-0.178694	-0.20623
[E].lTTEkGVFR.[S]	P00924	ENO1	0.134282	0.0945651	-0.479968	-0.0142995	-0.223622	0.0521611	0.0686572	0.132241	-0.0665064	0.182307
[N].fHHGDkL.[-]	P00924	ENO1	0.178263	0.656743	0.00959371	0.0628523	0.00688158	-0.0110258	0.286422	-0.00194949	-0.160476	-0.135164
[R].iATAIEkkAAD.[A]	P00924	ENO1	1.35292	0.313204	0.0797511	-0.0186774	0.175377	-0.0278422	0.171346	0.126125	-0.14759	-0.0954801	>3 sigma
[R].AAAAEkNVP.[L]	P00924	ENO1	0.283885	0.34455	0.00479813	0.0805827	0.0626132	0.0712842	0.207561	0.0300358	-0.0956072	-0.144399
[R].iGSEVYHN.[L]	P00924	ENO1	0.346196	0.794052	0.0293328	0.0523729	0.0840387	0.00850094	0.23598	0.239709	-0.124744	0.070703
[R].iATAIEk.[K]	P00924	ENO1	0.121407	#N/A	0.0217103	#N/A	-0.00323639	#N/A	0.265959	#N/A	-0.331827	#N/A		#N/A		#N/A		#N/A		#N/A		#N/A
[A].fVkANLDVkDQk.[A]	P00925	ENO2	-0.0657173	-1.01743	0.27284	-0.20539	0.106099	-0.0102347	0.341528	0.16121	-0.277894	0.116755		<-3 sigma
[RK].lGAnAILGVS.[LM]	P00924	ENO1	-0.430669	0.463408	-0.641808	-0.482065	0.611809	-0.627587	0.131262	-0.149798	-0.278827	0.47732
[R].sGETEDTFIADLVVG.[L]	P00924	ENO1	0.1589	#N/A	-0.294035	#N/A	0.235292	#N/A	0.0727525	#N/A	-0.0978409	#N/A		#N/A		#N/A		#N/A		#N/A		#N/A
[G].vSMAAAR.[A]	P00925	ENO2	0.144714	0.306601	-0.453396	-0.338105	-0.251466	-0.0924419	0.0260618	0.063604	-0.11049	0.213582
[E].lGDkAVYAGENFHHGDkL.[-]	P00925	ENO2	0.235953	#N/A	0.0985696	#N/A	-0.050666	#N/A	0.257277	#N/A	-0.271816	#N/A		#N/A		#N/A		#N/A		#N/A		#N/A
[Q].IkTGAPAR.[S]	P00924	ENO1	0.0758912	#N/A	0.155441	#N/A	-0.0241468	#N/A	0.127613	#N/A	-0.0291781	#N/A		#N/A		#N/A		#N/A		#N/A		#N/A
[K].aVDDFLLS.[L]	P00925	ENO2	0	0	0	0.19597	1.25799	-0.426441	0.723798	0.646104	1.10466	0					>3 sigma				>3 sigma
[RK].lGANAILG.[V]	P00924	ENO1	0	1.54105	-1.72029	0.615055	-0.884681	-0.09072	-0.233908	-0.185227	-0.302632	-0.689749		>3 sigma	<-3 sigma		<-3 sigma
[L].lSLDGTANkSk.[L]	P00925	ENO2	0.103672	0.103627	0.168278	-0.133171	0.0996345	0.158163	0.310657	0.119869	-0.0507441	0.050013
[W].gVMVSHR.[S]	P00924	ENO1	-0.230944	#N/A	-0.251886	#N/A	-0.135412	#N/A	0.14715	#N/A	-0.277412	#N/A		#N/A		#N/A		#N/A		#N/A		#N/A
[D].lVVGLR.[CT]	P00924	ENO1	0	0	-0.806476	-0.131988	0.112642	-0.118435	0.249357	0.105454	-0.200933	0.19145
[K].aADALL.[L]	P00924	ENO1	0	#N/A	0	#N/A	-0.0808095	#N/A	-0.118097	#N/A	0	#N/A		#N/A		#N/A		#N/A		#N/A		#N/A
[H].fAnDRVDIIAnDQGNR.[T]	P10591	SSA1	0.215832	0.263264	0.188427	-0.00800388	0.0444304	0.0722288	0.225571	0.0789939	-0.124478	-0.0233058
[L].iGDAAkNQAAMNPSNTVFDAkR.[L]	P10591	SSA1	0.306398	0.421139	0.0525302	0.100785	0.0858965	0.0800626	0.168981	0.11993	-0.189574	0.0138663
[Q].aAMNPSNTVFDAkR.[L]	P10591	SSA1	0.167079	0.258552	0.0913849	0.0201919	0.140326	0.0350519	0.168955	0.171179	-0.146435	0.0187548
[N].fNDPEVQADMkHFPFk.[L]	P10591	SSA1	1.00159	#N/A	0.623209	#N/A	-0.00128316	#N/A	0.224605	#N/A	-0.449518	#N/A	>3 sigma	#N/A		#N/A		#N/A		#N/A		#N/A
[R].lIGDAAkNQAAMNPSNTVFDAkR.[L]	P10591	SSA1	-0.636316	-0.466811	0.043284	-0.113393	0.207236	0.050636	0.234142	0.0781882	-0.169953	0.322942
[D].iANPIMSkLYQAGGAPGGAAGGAPGGFPGGAPPAPEAEGPTVEEVD.[-]	P10591	SSA1	0	#N/A	-0.233764	#N/A	0	#N/A	-0.703122	#N/A	-0.0166998	#N/A		#N/A		#N/A		#N/A		#N/A		#N/A
[D].iANPIMSk.[L]	P10591	SSA1	-0.0379995	#N/A	-0.234847	#N/A	0.177624	#N/A	0.22369	#N/A	-0.139647	#N/A		#N/A		#N/A		#N/A		#N/A		#N/A
[FY].vAFTDTER.[L]	P10591	SSA1	0.30953	-0.0221724	0.120058	-0.0812427	-0.124561	0.0372502	0.0322262	-0.0181075	-0.0443245	0.0644126
[K].iATFQERDPANLPWAS.[L]	P00358	TDH2	0.468465	-0.107968	0.119545	-0.0199236	-0.0191732	0.136166	0.191596	0.12506	-0.208139	-0.0138004
[S].mTATQkTVDGPSHkDWR.[G]	P00360	TDH1	0.367069	0.656893	-0.192432	-0.125995	-0.128646	-0.00559128	0.210912	0.15891	-0.170994	0.0355992
[H].iIVDGHk.[I]	P00358	TDH2	0.0793102	0.187321	-0.160683	-0.0734403	0.103202	-0.0789831	0.281514	0.178964	-0.197899	0.309844
[K].iATFQER.[D]	P00358	TDH2	0.0730402	0.297719	0.057808	-0.114446	-0.0547979	-0.132074	0.117941	0.0190036	-0.113369	0.124589
[P].fVFEkEPVSDWTDDVEAR.[I]	P00549	CDC19	0.0733026	0.475763	0.086782	-0.068563	0.0740261	0.0298138	0.192567	0.0623319	-0.112998	-0.0620799
[A].iALDTkGPEIR.[T]	P00549	CDC19	0.133624	0.0642757	-0.0638242	-0.0640894	0.0456294	0.0992748	0.130932	0.0913742	-0.132994	0.114991
[S].lNVVAGSDLR.[R]	P00549	CDC19	0.168438	0.262901	-0.0191475	-0.00113444	0.0278884	0.0369522	0.0994286	0.0235208	-0.0824428	0.140801
[A].vAAVFEQk.[A]	P00549	CDC19	0.628551	0.24776	0.0541156	-0.191468	0.104085	0.0509094	0.31023	0.0843323	0.0495673	-0.0263891
[A].iAYLPNYDDmR.[N]	P00549	CDC19	0.165282	0.35554	-0.0621023	-0.104761	0.106911	0.0772775	0.198126	0.102118	-0.203925	0.096261
[F].VFEkEPVSDWTDDVEAR.[I]	P00549	CDC19	-0.0590503	0.326475	-0.0471232	-0.0708326	0.127202	0.110279	0.23397	0.0129526	-0.235782	0.264222
[C].aTQMLESMTYNPRPTR.[A]	P00549	CDC19	0.287689	0.396212	0.180263	-0.0258129	0.0557133	0.0250061	0.275815	0.0626543	-0.145125	-0.117013
[S].lnVVAGSDLRR.[T]	P00549	CDC19	0.380239	0.284219	-0.0567237	-0.0112914	0.0671999	-0.00834287	0.126307	0.0768357	-0.099516	0.016702
[Q].mLESMTYNPRPTR.[A]	P00549	CDC19	0.443117	0.0031976	0.203714	0.0390769	0.174124	0.177315	0.331489	0.157336	-0.286135	0.0143655
[T].qMLESMTYNPRPTR.[A]	P00549	CDC19	0.335626	0.545058	0.030144	-0.0981023	-0.171466	0.344678	0.190065	0.314828	-0.137939	-0.0798506
[A].tQMLESMTYNPRPTR.[A]	P00549	CDC19	-0.0335266	0.0566687	0.316019	0.0564272	0.137815	0.125472	0.141371	0.0364091	-0.201141	-0.0248701
[F].ekEPVSDWTDDVEAR.[I]	P00549	CDC19	0.205586	0.900201	0.0129141	0.12363	-0.203226	0.158573	0.336918	0.140588	-0.592605	0.0968435
[R].lTSLNVVAGSDLR.[R]	P00549	CDC19	0.178923	0.61327	-0.0282376	0.082917	0.0883144	-0.273775	-0.0421161	-0.0811549	-0.0840851	0.377199
[L].vSkYRPNcPIILVTR.[C]	P00549	CDC19	0	0.500019	0.340111	-0.204253	0.129524	0.0448466	0.158974	0.195643	-0.0125486	0.210127
[P].lAIALDTkGPEIR.[T]	P00549	CDC19	0.339216	0.964982	-0.163827	0.104955	0.0717799	0.162949	0.154758	0.0879176	-0.177478	0.0852746		>3 sigma
[G].vNLPGTDVDLPALSEkDkEDLR.[F]	P00549	CDC19	0.372617	0.674685	0.220166	-0.217515	0.13593	0.00398716	0.26775	0.0128597	-0.0866227	-0.0137524
[G].vNNFDEILk.[V]	P00549	CDC19	0.56426	0.25073	-0.0442676	-0.0933738	0.121941	0.10615	0.179469	0.0298405	-0.124922	-0.238888
[A].iIVLSTSGTTPR.[L]	P00549	CDC19	0.0175923	0.400324	-0.0494938	-0.0690687	0.0568231	-0.0236884	0.128346	0.123895	0.0210878	0.0607094
[S].iIGTIGPkTNNPETLVALR.[K]	P00549	CDC19	0.375141	0.224356	0.163334	0.150429	-0.0609931	-0.0379228	0.165698	-0.0244595	-0.282549	-0.0567542
[R].INFGIEkAkEFG.[I]	P00549	CDC19	-0.434996	-0.0695339	-1.16008	-0.0183795	-0.339742	-0.0128809	0.0234451	0.0791848	-0.107369	-0.0133704			<-3 sigma
[V].fEkEPVSDWTDDVEAR.[I]	P00549	CDC19	0.231032	0.0866964	0.0145143	0.333658	0.0980037	-0.400027	0.0287092	-0.305642	-0.0307679	-0.00135619
[S].aVAAVFEQk.[A]	P00549	CDC19	0.0167843	0.0758178	-0.00680259	-0.412268	0.0856314	0.163293	0.127824	0.362389	-0.0734473	-0.141409
[R].iNFGIEkAkE.[F]	P00549	CDC19	0.102176	0.128107	0.00396578	0.0330842	-0.023963	0.090954	0.162911	0.0919599	-0.0848731	0.0802705
[N].fDEILkVTDGVMVAR.[G]	P00549	CDC19	0.495177	-0.0217857	-0.0704234	0.271939	-0.0812632	-0.0978567	0.0935003	-0.170797	-0.102511	-0.0177276
[N].vVAGSDLRR.[T]	P00549	CDC19	-0.051423	-0.00195583	0.140219	0.186948	0.103605	0.0394026	0.145426	0.0317087	-0.0868964	0.132137
[D].lGIEIPAPEVLAVQkk.[L]	P00549	CDC19	0.199129	0.265163	-0.0453508	-0.0294619	0.0596602	0.0830801	0.189926	0.140456	-0.0640542	0.27515
[L].aGkPVIcATQMLESMTYNPRPTR.[A]	P00549	CDC19	0	#N/A	0.239678	#N/A	0.351769	#N/A	0.191674	#N/A	-0.208297	#N/A		#N/A		#N/A		#N/A		#N/A		#N/A
[P].vIcATQMLESMTYNPRPTR.[A]	P00549	CDC19	-0.891508	#N/A	-0.140606	#N/A	0.0945049	#N/A	0.177219	#N/A	-0.141936	#N/A	<-3 sigma	#N/A		#N/A		#N/A		#N/A		#N/A
[N].lAGkPVIcATQMLESMTYNPRPTR.[A]	P00549	CDC19	0.1076	0.0521875	0.237915	0.285114	0.00706563	0.119159	0.302035	-0.0755131	-0.333501	-0.0380318
[G].vFPFVFEkEPVSDWTDDVEAR.[I]	P00549	CDC19	1.80881	0.877146	0.426842	0.342736	-0.356923	-0.0798381	0.0522086	0.0726057	-0.313152	0.0854516	>3 sigma
[K].lIAkSNLAGkPVIcATQMLESMTYNPRPTR.[A]	P00549	CDC19	0	#N/A	0.306347	#N/A	1.13802	#N/A	-0.118456	#N/A	-0.536175	#N/A		#N/A		#N/A	>3 sigma	#N/A		#N/A		#N/A
[L].iAkSNLAGkPVIcATQMLESMTYNPRPTR.[A]	P00549	CDC19	0	#N/A	0	#N/A	0.00158427	#N/A	0.141942	#N/A	-0.554881	#N/A		#N/A		#N/A		#N/A		#N/A		#N/A
[G].vNNFDEILkVTDGVMVAR.[G]	P00549	CDC19	-0.324647	0.530822	-0.211087	-0.12584	0.0456052	0.180859	0.0811926	-0.065409	-0.220824	0.0738359
[A].vFEQkAkAIIVLSTSGTTPR.[L]	P00549	CDC19	1.08302	#N/A	-0.227187	#N/A	0.276446	#N/A	0.139201	#N/A	-0.36287	#N/A	>3 sigma	#N/A		#N/A		#N/A		#N/A		#N/A
[S].fQVLEVVDDkTLk.[V]	P00549	CDC19	0.323677	0.208419	0.0251429	-0.236651	-0.0239496	0.2465	0.00522883	0.121339	-0.0196752	-0.0403641
[M].lESMTYNPRPTR.[A]	P00549	CDC19	0.24072	0.259557	-0.0072429	-0.198883	0.0834523	0.0988053	0.196487	0.141457	-0.164509	0.0816056
[A].vIAEQAIAYLPNYDDMR.[N]	P00549	CDC19	0.313768	#N/A	-0.128581	#N/A	-0.0304786	#N/A	0.0953618	#N/A	-0.179471	#N/A		#N/A		#N/A		#N/A		#N/A		#N/A
[N].fSHGSYEYHkSVIDNAR.[K]	P00549	CDC19	0.244375	0.346568	0.0839653	0.0474711	0.00429122	0.119413	0.15707	0.101678	-0.218103	-0.126954
[G].fkAGAGHSnTLQVSTV.[-]	P00549	CDC19	0.432184	0.334972	-0.161443	0.0363588	0.0655075	-0.00399974	0.203719	0.0867585	-0.170845	0.0243916
[R].lVSkYRPNcPIILVTR.[C]	P00549	CDC19	-1.12609	1.49738	-0.214611	0.083637	0.115858	-0.0224652	0.445399	0.175534	0.0291048	0.555846	<-3 sigma	>3 sigma
[N].vVAGSDLR.[R]	P00549	CDC19	0.220056	0.908733	-0.0380903	-0.0470278	0.00414769	0.0153874	0.141495	0.0920163	-0.0553899	0.173847
[N].iTkVISAGR.[I]	P00549	CDC19	0.103829	0.171595	-0.086588	-0.139529	0.147547	-0.0264045	0.163317	0.122138	0.00429383	0.104017
[A].lSEkDkEDLR.[F]	P00549	CDC19	0.026317	0.0878524	-0.0988752	-0.0944856	0.00388985	0.291285	0.248916	0.277221	-0.154291	0.212093
[R].FGVknGVHMV.[F]	P00549	CDC19	#N/A	-0.0597441	#N/A	-0.0846501	#N/A	0.342224	#N/A	0.0400064	#N/A	-0.132252	#N/A		#N/A		#N/A		#N/A		#N/A
[Q].gFkAGAGHSNTLQVSTV.[-]	P00549	CDC19	0.13478	-0.0420561	0.151869	0.0237099	0.0760472	-0.178009	0.233312	-0.247796	-0.183354	0.0166792
[I].aLDTkGPEIR.[T]	P00549	CDC19	0.183473	0.397521	-0.149916	-0.0202828	0.11443	-0.030849	0.174042	0.204965	-0.533123	0.140965
[S].iQGFkAGAGHSnTLQVSTV.[-]	P00549	CDC19	-0.418709	0.256083	-0.186815	-0.0204701	0.168396	0.104407	0.281934	0.253052	0.103335	-0.22035
[R].fGVknGVHM.[V]	P00549	CDC19	-0.0994004	#N/A	0.248952	#N/A	0.102881	#N/A	0.0557621	#N/A	-0.0254802	#N/A		#N/A		#N/A		#N/A		#N/A		#N/A
[Y].vSIQGFkAGAGHSnTLQVSTV.[-]	P00549	CDC19	0.0668829	0.827635	0.170903	0.0208327	0.555818	0.0302393	0.137878	0.0287121	-0.274436	-0.335143
[S].mTYNPRPTR.[A]	P00549	CDC19	0.19589	-0.296603	0.151915	-0.0619461	0.153699	0.201596	0.285385	-0.0564313	-0.159448	0.166234
[R].lTSLNV.[V]	P00549	CDC19	0	#N/A	0	#N/A	-0.256796	#N/A	-0.366506	#N/A	0	#N/A		#N/A		#N/A		#N/A		#N/A		#N/A
[E].vVDDkTLk.[V]	P00549	CDC19	0.160362	#N/A	-0.00783349	#N/A	0.25838	#N/A	0.0710462	#N/A	-0.0615685	#N/A		#N/A		#N/A		#N/A		#N/A		#N/A
[PLK].iILVTR.[HCKE]	P00549	CDC19	0.111391	#N/A	0.0413323	#N/A	0.0361593	#N/A	0.0952292	#N/A	0.200559	#N/A		#N/A		#N/A		#N/A		#N/A		#N/A
[M].tYNPRPTR.[A]	P00549	CDC19	-0.0602137	#N/A	-0.207051	#N/A	0.212782	#N/A	0.233701	#N/A	-0.300494	#N/A		#N/A		#N/A		#N/A		#N/A		#N/A
[A].lQIEDPSADELR.[K]	P40150	SSB2	0.083824	0.0918039	-0.00961603	0.031794	0.160471	0.0984485	0.191772	0.0233129	-0.169621	0.173808
[Q].aTkDAGAISGLNVLR.[I]	P40150	SSB2	0.444323	#N/A	0.139104	#N/A	-0.011051	#N/A	0.236397	#N/A	-0.154758	#N/A		#N/A		#N/A		#N/A		#N/A		#N/A
[A].aLQIEDPSADELR.[K]	P40150	SSB2	0.207884	0.333772	0.188354	-0.389549	0.00142224	0.424489	0.0948643	-0.386108	-0.226073	-0.519369
[L].aALQIEDPSADELR.[K]	P40150	SSB2	0.0326836	0.330556	-0.119261	-0.199904	0.122872	0.0549832	0.0463192	0.112846	-0.178002	-0.115124
[R].lSSEEIEkM.[V]	P40150	SSB2	-0.302487	0.060021	-0.113258	0.113574	0.111842	0.000837785	0.154241	-0.0655661	-0.196917	-0.0998778
[N].iTISnAVGR.[L]	P40150	SSB2	0.0415001	0.766852	0.0338565	-0.0157218	-0.0824331	0.0919583	0.183233	0.0964307	-0.1408	0.0712388
[L].fkSTLEPVEQVLkDAk.[I]	P40150	SSB2	-0.153382	0.517257	-0.0349771	-0.0455064	0.288195	0.0481763	0.246216	0.191189	-0.208695	-0.0742566
[T].vTDPVLSSkLkR.[G]	P40150	SSB2	0.161083	0.326765	-0.162919	-0.0496236	0.264496	0.101729	0.274756	0.175802	-0.0493979	-0.402577
[R].lIGDAAkNQAALNPR.[N]	P40150	SSB2	0.2627	0.0688207	-0.0851524	0.113418	0.0474499	0.0571156	0.167276	0.216683	-0.183888	0.13717
[T].vTDPVLSSk.[L]	P40150	SSB2	-0.260765	0.0640853	-0.169328	-0.0415837	-0.0603859	-0.016464	0.236929	0.0616757	-0.139117	-0.15376
[E].iSAMVLTk.[M]	P40150	SSB2	-0.146387	0.25721	0.0174304	0.0285446	0.220848	0.0891626	0.229283	0.21422	-0.122778	-0.0936438
[T].lEPVEQVLkDAk.[I]	P40150	SSB2	-0.373327	0.348189	-0.0121441	0.109016	0.173195	0.112783	0.327469	0.0515318	0.0196633	-0.213267
[R].LSSEEIEkmVNQAEEFkAADEA.[F]	P40150	SSB2	-0.00941412	0.0380282	-0.209009	-0.062522	0.112411	0.0258451	0.210314	0.212105	-0.311724	-0.00370415
[R].iINEPTAAAIAYGLGAGkSEkER.[H]	P40150	SSB2	0.441873	0.539492	0.0834695	0.377769	0.100005	-0.0514069	0.00859717	-0.030309	-0.151808	-0.216817
[K].iSkSQIDEVVLVGGSTR.[I]	P40150	SSB2	0.149119	0.545777	0.0690555	0.0303574	0.145085	0.140116	0.182241	0.0851311	-0.287499	-0.0713094
[A].lAALQIEDPSADELR.[K]	P40150	SSB2	-0.160115	0.310367	-0.0783629	-0.0793158	0.122413	0.14826	0.211359	-0.0662548	-0.13862	0.0909028
[Y].vASIEQTVTDPVLSSkLkR.[G]	P40150	SSB2	0.108372	0.827106	0.0219378	-0.246575	0.170752	0.0718293	0.135403	0.128857	-0.314433	-0.00726578
[A].vITVPAYFNDAQR.[Q]	P40150	SSB2	0.266342	-0.218632	0.00831699	-0.205207	0.027867	0.0279966	0.209601	-0.0063826	-0.279644	-0.0659168
[Y].vASIEQTVTDPVLSSk.[L]	P40150	SSB2	0.0431593	0.343674	-0.19234	-0.0961653	0.141715	0.169917	-0.0299813	0.180728	-0.0949403	-0.0579176
[K].iGkkVEkAVITVPAYFnDAQR.[Q]	P40150	SSB2	0.242847	0.0634015	-0.0631443	-0.124089	0.039984	0.257569	0.286348	0.393339	-0.234731	-0.283998
[S].iEQTVTDPVLSSk.[L]	P40150	SSB2	0.0151014	0.0183386	0.0112545	0.00435545	0.108395	0.133883	0.244156	0.221167	0.00024156	-0.210461
[S].fVAFTPEER.[L]	P11484	SSB1	0.210155	0.67783	-0.112671	-0.0644194	-0.140341	-0.0120664	-0.0180893	-0.0187233	-0.137177	0.0716182
[C].vATYESSVEIIANEQGNR.[V]	P40150	SSB2	0.111674	#N/A	-0.114217	#N/A	0.170468	#N/A	0.238649	#N/A	-0.306307	#N/A		#N/A		#N/A		#N/A		#N/A		#N/A
[S].iEQTVTDPVLSSkLkR.[G]	P40150	SSB2	0.30695	0.438972	-0.00026499	-0.22853	0.166781	0.0764167	0.15043	0.0648886	-0.186167	-0.0309052
[K].iGkkVEkAVITVPAY.[F]	P40150	SSB2	0.155239	0.375382	0.0796407	-0.0317118	0.223546	0.0775681	0.316519	0.0992273	-0.197056	-0.106161
[T].fTTcADNQTTVQFPVYQGER.[V]	P11484	SSB1	0.420914	-0.0468066	0.133599	-0.295802	0.252208	0.213151	0.235046	0.198473	-0.358776	-0.237789
[S].yVASIEQTVTDPVLSSkLkR.[G]	P40150	SSB2	0.325723	#N/A	-0.294763	#N/A	0.326147	#N/A	0.353181	#N/A	-0.19613	#N/A		#N/A		#N/A		#N/A		#N/A		#N/A
[R].lSSEEIEkMVNQAEE.[F]	P40150	SSB2	0.124387	0.0645854	0.1969	-0.170184	0.00788832	-0.194877	0.138445	0.563119	-0.221969	0.0426895
[E].iIANEQGNR.[VI]	P40150	SSB2	-0.198704	0.287271	-0.0213584	-0.0665731	-0.0515536	0.150723	0.200163	-0.00109536	-0.0508038	0.217703
[A].lSDALAALQIEDPSADELR.[K]	P40150	SSB2	0.662047	-0.0801666	-0.0193977	0.640541	0.241886	-0.137841	0.135723	-0.0994736	-0.0083766	-1.016										<-3 sigma
[A].lFkSTLEPVEQVLkDAk.[I]	P40150	SSB2	-0.239587	0.938871	0.0525523	-0.53778	0.191193	0.169941	0.170255	-0.138407	-0.30438	-0.447403
[K].lLSDFFDGkQ.[L]	P40150	SSB2	0.0454684	0.00803856	-0.00669036	-0.277569	0.0209751	0.097909	0.0176403	0.545341	-0.200677	0.364817
[S].vTQTTVEVDSLFDGEDFESSLTR.[A]	P40150	SSB2	1.32585	-0.699534	0.303111	-0.0781284	0.509307	0.160881	0.169184	-0.207785	-0.18986	-0.388464	>3 sigma
[K].lLSDFFDGkQLEkS.[I]	P40150	SSB2	0.987713	1.31355	-0.0131479	0.114215	0.302254	0.182245	0.0511317	0.0033824	-0.237315	0.0494697	>3 sigma	>3 sigma									Yes
[T].vEVDSLFDGEDFESSLTR.[A]	P40150	SSB2	-0.070772	#N/A	0.771376	#N/A	0.358706	#N/A	0.0805592	#N/A	-0.224007	#N/A		#N/A		#N/A		#N/A		#N/A		#N/A
[K].lLSDFFDGkQLEkSINPDEAVAYGAA.[V]	P40150	SSB2	0	#N/A	-0.375902	#N/A	0.290033	#N/A	0.236545	#N/A	-0.24262	#N/A		#N/A		#N/A		#N/A		#N/A		#N/A
[T].lEPVEQVLkDAkISkSQIDEVVLVGGSTR.[I]	P40150	SSB2	0	#N/A	-0.602126	#N/A	-0.129884	#N/A	0.125822	#N/A	-0.444185	#N/A		#N/A		#N/A		#N/A		#N/A		#N/A
[T].lSSVTQTTVEVDSLFDGEDFESSLTR.[A]	P40150	SSB2	0.593667	0.39024	0.176641	0.0829578	0.123549	0.179161	0.288387	0.024059	-0.224412	0.141984
[E].iSAMVLTkMkEIAEAk.[I]	P40150	SSB2	0	#N/A	0.431893	#N/A	0.0896036	#N/A	0.479696	#N/A	-0.137825	#N/A		#N/A		#N/A		#N/A		#N/A		#N/A
[A].fAkkHEAR.[Q]	P40150	SSB2	0.00990185	0.187074	-0.173133	-0.164787	0.178586	-0.0290236	0.177406	-0.172667	-0.200639	0.0288934
[K].lLSDFFDGkQLEkSINPDEA.[V]	P40150	SSB2	0.110305	#N/A	0.472809	#N/A	0.160678	#N/A	0.257642	#N/A	-0.270195	#N/A		#N/A		#N/A		#N/A		#N/A		#N/A
[S].lGVGMQGDMFGIVVPR.[N]	P11484	SSB1	0.0188206	#N/A	-0.165508	#N/A	0.187896	#N/A	0.0182508	#N/A	-0.279947	#N/A		#N/A		#N/A		#N/A		#N/A		#N/A
[A].aLSDALAALQIEDPSADELR.[K]	P40150	SSB2	0.983707	#N/A	-0.760306	#N/A	0.42406	#N/A	0.16495	#N/A	0.0249882	#N/A	>3 sigma	#N/A		#N/A		#N/A		#N/A		#N/A
[G].lDISDDAR.[A]	P40150	SSB2	-0.1437	0.359013	-0.00906355	0.00480788	0.0477709	0.0822272	0.216989	0.0249331	0.00273627	-0.0135182
[L].iGDAAknQAALNPR.[N]	P40150	SSB2	0.447316	0.257565	0.146396	-0.0464527	0.0955426	0.0910679	0.23291	0.0381131	-0.177149	0.0676108
[K].tGLDISDDAR.[A]	P40150	SSB2	0.227647	#N/A	-0.0506083	#N/A	-0.102559	#N/A	0.15838	#N/A	-0.109862	#N/A		#N/A		#N/A		#N/A		#N/A		#N/A
[T].lLGEFDLk.[N]	P40150	SSB2	0.527876	#N/A	0.0549133	#N/A	-0.0274732	#N/A	0.438933	#N/A	-0.0488287	#N/A		#N/A		#N/A		#N/A		#N/A		#N/A
[A].iAYGLGAGkSEkER.[H]	P40150	SSB2	0.127262	0.297902	0.107317	-0.0114562	-0.0360292	0.037401	0.0755411	0.0343407	-0.286315	0.103011
[G].vGMQGDMFGIVVPR.[N]	P11484	SSB1	0	#N/A	0	#N/A	0.377504	#N/A	1.46431	#N/A	-0.518078	#N/A		#N/A		#N/A		#N/A	>3 sigma	#N/A		#N/A
[A].iFEVDAnGILk.[V]	P40150	SSB2	0.177569	#N/A	-1.01897	#N/A	-1.90827	#N/A	1.67201	#N/A	0.367269	#N/A		#N/A	<-3 sigma	#N/A	<-3 sigma	#N/A	>3 sigma	#N/A		#N/A	Yes
[E].fkkkTGLDISDDAR.[A]	P40150	SSB2	-0.0293077	0.266842	-0.0383944	0.00429084	0.172707	0.252853	0.246606	0.0959967	-0.224429	0.236019
[K].iSkSQIDEVVL.[V]	P40150	SSB2	-0.494687	-0.199948	0.00770851	-0.256236	0.0741098	0.06699	0.453172	0.41859	-0.0207993	-0.568756
[IM].fGIVVPR.[N]	P40150	SSB2	-0.119602	0.18689	0.10436	0.139791	0.244136	-0.100884	-0.0525661	0.141379	-0.0113182	-0.115954
[I].iANEQGNR.[VI]	P40150	SSB2	0.218171	#N/A	-0.451815	#N/A	-0.0373354	#N/A	-0.0739548	#N/A	-0.478528	#N/A		#N/A		#N/A		#N/A		#N/A		#N/A
[M].vLTkMkEIAEAk.[I]	P40150	SSB2	0.384538	#N/A	-0.236905	#N/A	0.577901	#N/A	0.480906	#N/A	-0.330347	#N/A		#N/A		#N/A		#N/A		#N/A		#N/A
[F].vAFTPEER.[L]	P11484	SSB1	0.222802	0.210761	0.0770591	-5.50858e-05	0.0517118	0.132701	0.145022	0.0212554	-0.174558	0.0233402
[T].iSNAVGR.[L]	P40150	SSB2	0.154146	#N/A	0.141379	#N/A	-0.117991	#N/A	0.0353167	#N/A	-0.166301	#N/A		#N/A		#N/A		#N/A		#N/A		#N/A
[K].vEkAVITVPAY.[F]	P40150	SSB2	0.0224186	#N/A	-0.226888	#N/A	0.0483343	#N/A	0.457865	#N/A	-0.0497759	#N/A		#N/A		#N/A		#N/A		#N/A		#N/A
[K].vTAVEkSTGkSSNITISnAVGR.[L]	P40150	SSB2	0.217432	#N/A	-0.325941	#N/A	0.0955948	#N/A	-0.0908893	#N/A	-0.117052	#N/A		#N/A		#N/A		#N/A		#N/A		#N/A
[G].lGAGkSEkER.[H]	P40150	SSB2	-0.364912	-0.00261591	-0.232618	-0.116206	-0.0138768	0.11089	-0.06362	0.0534675	-0.321126	0.193717
[R].vVTkAMSSR.[-]	P40150	SSB2	0.0858388	-0.303252	-0.0533986	-0.280507	0.108176	-0.273354	0.117992	0.538809	-0.34879	-0.204986
[T].fTTVSDNQTTVQFPVYQGER.[V]	P40150	SSB2	0.923143	0.916317	0.0160918	0.163821	0.150381	0.0189989	0.331606	0.128938	-0.237154	-0.0626794
[S].fVAFTPqER.[L]	P40150	SSB2	0.155559	0.574872	-0.0465051	-0.155219	-0.124214	0.0249412	-0.00842946	-0.00668383	-0.136675	0.10452
[F].vAFTPQER.[L]	P40150	SSB2	0.171877	0.241694	0.0445104	-0.0193033	0.048973	0.129177	0.137929	0.0182888	-0.153337	0.0280611
[D].iALRPEILAEHQkYTR.[E]	P14540	FBA1	0.263999	0.560314	0.158691	-0.0615215	0.173695	0.126143	0.195467	0.0355377	-0.061375	0.0573592
[L].yAGDIALRPEILAEHQkYTR.[E]	P14540	FBA1	0.0659975	0.397889	-0.00280006	-0.0552193	0.0651166	0.120504	0.211259	0.0803334	-0.216765	-0.0417461
[Y].imSPVGNPEGPEkPNkkFFDPR.[V]	P14540	FBA1	-0.099294	0.172779	-0.136141	0.0357683	-0.13844	0.0997231	0.188093	0.200361	-0.228803	0.113468
[F].aIPAINVTSSSTAVAALEAAR.[D]	P14540	FBA1	0.119585	0.262913	0.0314095	-0.110278	0.0885168	0.102244	0.165717	0.22842	-0.162945	-0.114452
[S].sTAVAALEAAR.[D]	P14540	FBA1	0.319862	0.234038	0.0340525	-0.121492	0.248826	-0.0296443	0.295595	0.170517	-0.323002	-0.0251605
[Y].iMSPVGNPEGPEkPNkk.[F]	P14540	FBA1	0.284871	0.378823	0.00703174	-0.0639522	0.246098	0.067197	0.273713	0.151657	-0.300674	0.107885
[M].gVEQILkR.[K]	P14540	FBA1	-0.0378396	0.284009	-0.121622	-0.095372	0.095831	0.119531	0.206629	0.0958109	-0.18245	0.0542654
[L].fTYAkEHkFAIPAINVTSSSTAVAALEAAR.[D]	P14540	FBA1	0	0.366218	-0.455689	-0.0642278	0.324291	0.496948	-0.031801	0.0193728	-0.10516	-0.390458
[N].lFTYAkEHk.[F]	P14540	FBA1	-0.0984304	0.864461	-0.142653	-0.197262	-0.0676111	0.0436043	0.310262	0.137528	-0.226986	0.144731
[E].fHTGIDnGVVk.[V]	P14540	FBA1	0.0832925	#N/A	-0.110647	#N/A	0.144316	#N/A	0.260728	#N/A	0.0946017	#N/A		#N/A		#N/A		#N/A		#N/A		#N/A
[S].ikGAIAAAHYIR.[S]	P14540	FBA1	0.364672	-0.44029	-0.104928	-0.31199	0.0318198	-0.0787047	0.327621	0.205797	-0.431189	-0.121576
[A].iNVTSSSTAVAALEAAR.[D]	P14540	FBA1	-0.117365	0.621121	0.041344	0.104463	0.118413	0.12038	0.164781	-0.00961667	-0.244907	-0.0342903
[G].lYAGDIALRPEILAEHQk.[Y]	P14540	FBA1	-0.0359491	#N/A	0.169352	#N/A	0.254666	#N/A	0.317094	#N/A	-0.428701	#N/A		#N/A		#N/A		#N/A		#N/A		#N/A
[G].iSNEGQNASIkGAIAAAHYIR.[S]	P14540	FBA1	0.268534	0.157567	-0.0514694	-0.0616128	-0.0698596	-0.167142	0.103303	0.0891235	-0.12122	-0.0585815
[G].lYAGDIALRPEILAEHQkYTR.[E]	P14540	FBA1	0.481077	0.489932	0.246908	-0.081859	-0.0591553	0.0132766	0.169605	0.0784326	-0.227377	-0.0112943
[S].iAPAYGIPVVLHSDHcAkk.[L]	P14540	FBA1	-0.392758	0.283672	-0.11204	-0.210112	0.028633	-0.0599033	0.345043	-0.144795	-0.281155	0.306659
[V].gNPEGPEkPNk.[K]	P14540	FBA1	0.223453	#N/A	-0.221134	#N/A	-0.0309538	#N/A	-0.116701	#N/A	-0.348649	#N/A		#N/A		#N/A		#N/A		#N/A		#N/A
[K].fAIPAINVTSSSTAVAA.[L]	P14540	FBA1	0.126527	0.319759	0.123558	0.0186146	0.196312	-0.0698179	0.252392	0.124383	-0.299102	-0.244685
[P].vGNPEGPEkPNkk.[F]	P14540	FBA1	0.16461	0.441937	-0.0748311	-0.11208	0.0651011	-0.108831	0.117281	-0.170035	-0.179697	-0.116988
[N].lFTYAkEHkFAIPAINVTSSSTAVAALEAAR.[D]	P14540	FBA1	0	#N/A	0.632006	#N/A	1.74672	#N/A	0.201676	#N/A	-0.652025	#N/A		#N/A		#N/A	>3 sigma	#N/A		#N/A		#N/A
[K].fAIPAINVTSSSTAVAALEAAR.[D]	P14540	FBA1	0.140685	0.626002	0.313221	-0.0715018	0.217186	0.0651896	0.140946	-0.108311	-0.237336	0.0220904
[R].mAAMDQWLEME.[I]	P14540	FBA1	0.213195	#N/A	-0.406357	#N/A	-0.0414541	#N/A	0.0201137	#N/A	-0.232241	#N/A		#N/A		#N/A		#N/A		#N/A		#N/A
[K].fAIPAINVTSSST.[A]	P14540	FBA1	0.238266	1.46467	0.084895	-0.374823	0.0913569	0.189667	0.185361	-0.0570371	-0.41328	0.193647		>3 sigma
[K].fAIPAINVTSSSTA.[V]	P14540	FBA1	-0.0328597	0.210858	-0.128103	-0.104987	0.154115	0.0152432	0.178414	0.156537	-0.338543	0.139899
[A].lRPEILAEHqkYTR.[E]	P14540	FBA1	-0.0389229	0.288841	0.267905	-0.0100673	0.207631	0.129022	0.200387	0.0439474	-0.149102	0.0898344
[A].iAAAHYIR.[S]	P14540	FBA1	0.247042	0.116458	0.129024	0.076231	0.0610475	-0.154068	-0.13616	-0.154403	-0.225377	0.0343457
[L].fTYAkEHk.[F]	P14540	FBA1	0.397627	0.232439	-0.0530097	-0.162213	0.110859	0.0990776	0.321928	0.197497	-0.19047	0.201435
[M].sPVGNPEGPEkPNk.[K]	P14540	FBA1	-0.0768773	#N/A	-0.12229	#N/A	-0.0160276	#N/A	-0.0018836	#N/A	-0.381333	#N/A		#N/A		#N/A		#N/A		#N/A		#N/A
[K].vNLDTDcQYAY.[L]	P14540	FBA1	-0.731041	#N/A	0.099786	#N/A	0.0998154	#N/A	0.0550366	#N/A	-0.139915	#N/A		#N/A		#N/A		#N/A		#N/A		#N/A
[A].vAALEAAR.[D]	P14540	FBA1	0.184331	0.220959	-0.348283	-0.0570039	0.0781841	0.0334634	0.276108	0.166856	-0.0149316	0.0852983
[E].iLAEHQkYTR.[E]	P14540	FBA1	-0.01202	0.416299	0.182795	0.00912977	0.112223	0.169676	0.27425	0.00341329	-0.174859	0.156589
[V].aALEAAR.[D]	P14540	FBA1	0.132012	0.187772	0.110812	-0.0870209	-0.085669	-0.0244287	0.191002	-0.0360521	-0.254241	-0.0472718
[K].iTkSLETFR.[T]	P14540	FBA1	-0.304784	0.749476	-0.0482744	-0.231897	-0.309766	-0.103354	0.0304733	0.0399248	-0.192667	0.101494
[T].mGAkITkSLETFR.[T]	P14540	FBA1	0.368407	0.720501	-0.037599	0.0881084	-0.258997	-0.269872	0.0232101	0.149137	-0.277758	0.178271
[K].fAIPAIN.[V]	P14540	FBA1	0	0	0	-0.888302	0.11808	-0.0715462	0.531937	-0.0457488	-0.731856	0				<-3 sigma
[K].fAIPAINVTS.[S]	P14540	FBA1	1.85789	0.292228	0.238884	-1.01679	0.200976	0.232065	0.378106	1.03873	-0.111623	-0.279631	>3 sigma			<-3 sigma				>3 sigma
[H].gLYAGDIALRPEILAEHQkYTR.[E]	P14540	FBA1	-0.149104	#N/A	0.0473243	#N/A	-0.086869	#N/A	0.297606	#N/A	-0.252431	#N/A		#N/A		#N/A		#N/A		#N/A		#N/A
[K].fAIPAINVT.[S]	P14540	FBA1	0	0	0.17469	0.39061	0.0496312	-0.323098	-0.0370959	0.583836	-0.350786	1.181										>3 sigma
[K].fAIPAINVTSS.[S]	P14540	FBA1	0.684767	#N/A	-0.341841	#N/A	0.0178496	#N/A	0.106246	#N/A	-0.107056	#N/A		#N/A		#N/A		#N/A		#N/A		#N/A
[T].yAkEHk.[F]	P14540	FBA1	0.299183	#N/A	-0.053158	#N/A	0.148277	#N/A	0.220121	#N/A	-0.159998	#N/A		#N/A		#N/A		#N/A		#N/A		#N/A
[V].lNkkDYIMSPVGNPEGPEkPNkk.[F]	P14540	FBA1	-0.834301	#N/A	-0.908399	#N/A	-0.317473	#N/A	0.374888	#N/A	-0.849926	#N/A	<-3 sigma	#N/A	<-3 sigma	#N/A		#N/A		#N/A	<-3 sigma	#N/A	Yes
[M].gVEQILk.[R]	P14540	FBA1	0.120655	#N/A	-0.0667383	#N/A	0.207486	#N/A	0.121047	#N/A	-0.100159	#N/A		#N/A		#N/A		#N/A		#N/A		#N/A
[K].fAIPAINV.[T]	P14540	FBA1	0	#N/A	0	#N/A	0	#N/A	0.27963	#N/A	0	#N/A		#N/A		#N/A		#N/A		#N/A		#N/A
[K].fADIGNTVk.[L]	P03962	URA3	0.304029	0.289775	-0.12808	-0.0588758	0.32453	0.0830076	0.283271	0.171632	-0.0618908	0.106536
[R].iAEWADITNAHGVVGPG.[I]	P03962	URA3	0.221558	0.399738	0.0252631	-0.00774017	0.138313	-0.175455	0.112478	0.287646	-0.267241	0.0732094
[T].vkLQYSAGVYR.[I]	P03962	URA3	0.0903744	#N/A	-0.101901	#N/A	0.0168211	#N/A	0.262731	#N/A	-0.0463958	#N/A		#N/A		#N/A		#N/A		#N/A		#N/A
[G].lkQAAEEVTkEPR.[G]	P03962	URA3	0.104581	0.312638	-0.0531542	-0.0926731	0.192908	0.0953979	0.172933	0.205516	-0.205552	0.0474483
[R].AATHPSPVAAkLFN.[I]	P03962	URA3	0.139606	#N/A	-0.0217694	#N/A	0.0828749	#N/A	0.206651	#N/A	-0.10822	#N/A		#N/A		#N/A		#N/A		#N/A		#N/A
[G].vGLDDkGDALGQQYR.[T]	P03962	URA3	0.343184	0.341768	-0.0912782	-0.0555901	0.148351	0.142958	0.206364	-0.184604	-0.177861	0.113787
[W].lIMTPGVGLDDkGDALGQQYR.[T]	P03962	URA3	0.305473	0.423677	-0.0188935	-0.00383118	0.205652	-0.0325217	0.292968	0.116154	-0.302092	-0.138556
[L].iMTPGVGLDDkGDALGqQYR.[T]	P03962	URA3	0.450892	0.374524	-0.0228014	-0.0577024	0.165454	0.0641685	0.279582	0.0789281	-0.131216	0.0454929
[R].iAEWADITnAHG.[V]	P03962	URA3	0.186381	0.207124	0.0529748	-0.0852543	0.158469	0.0847601	0.239145	0.0871228	-0.122951	-0.166055
[G].iVSGLkQAAEEVTkEPR.[G]	P03962	URA3	0.0924039	0.253172	-0.169915	-0.0438692	-0.0590168	-0.0274736	0.128843	0.0914054	-0.237826	-0.00804538
[T].vDDVVSTGSDIIIVGR.[G]	P03962	URA3	0.0708291	0.145427	-0.171197	-0.18558	0.0415748	0.158409	0.648831	-0.0399676	0.808975	0.0942849
[D].iAkSDkDFVIGFIAQR.[D]	P03962	URA3	-0.157032	0.0873775	-0.114361	-0.133157	0.137972	-0.122641	0.142659	0.143459	-0.26109	0.108212
[D].dVVSTGSDIIIVGR.[G]	P03962	URA3	-0.545467	0.723027	0.0501909	-0.363145	0.372676	0.171796	0.29301	0.122814	0.0258737	0.0240113
[A].aTHPSPVAAk.[L]	P03962	URA3	-0.203978	0.385967	0.0965365	-0.119379	0.127179	-0.19624	0.185016	0.124744	-0.020705	0.183968
[Q].aAEEVTkEPR.[G]	P03962	URA3	0.106576	0.24153	-0.0189704	0.0161924	0.0503444	0.130121	0.145684	0.322611	-0.0890954	0.0301841
[G].vVGPGIVSGLkQAAEEVTkEPR.[G]	P03962	URA3	0.288733	0.115677	-1.88712	-0.24624	-0.0691941	0.111726	0.108324	0.316043	-0.249963	0.0086967			<-3 sigma
[R].iAEWADITnAHGVVGPGIVSGLkQAAEEVTkEPR.[G]	P03962	URA3	-0.569321	#N/A	-0.57517	#N/A	-0.839328	#N/A	-0.0121774	#N/A	-0.0661472	#N/A		#N/A		#N/A	<-3 sigma	#N/A		#N/A		#N/A
[E].lLELVEALGPk.[I]	P03962	URA3	0.549008	#N/A	-0.072685	#N/A	-0.0285173	#N/A	0.165594	#N/A	0.00977498	#N/A		#N/A		#N/A		#N/A		#N/A		#N/A
[K].lQYSAGVYR.[I]	P03962	URA3	-0.440268	0.31268	-0.123783	-0.00983592	0.246582	-0.032394	0.0829175	0.107322	-0.0207151	0.115072
[R].iAEWADITNAHGVVGPGIVSG.[L]	P03962	URA3	0.594752	-0.745453	0.361543	0.102961	0.295532	-0.116179	0.0665075	-0.426105	-0.354121	0.224041
[T].vDIAkSDkDFVIGFIAQR.[D]	P03962	URA3	0.0753082	#N/A	-0.121919	#N/A	0.0612903	#N/A	0.173802	#N/A	-0.136834	#N/A		#N/A		#N/A		#N/A		#N/A		#N/A
[R].AATHPSPVAAkL.[F]	P03962	URA3	0.0824155	#N/A	-0.0479611	#N/A	0.254881	#N/A	0.32875	#N/A	-0.074258	#N/A		#N/A		#N/A		#N/A		#N/A		#N/A
[V].kLQYSAGVYR.[I]	P03962	URA3	0.267317	0.249541	-0.143555	-0.107798	0.130594	0.0202063	0.131942	0.0114541	-0.464044	0.0424409
[K].fADIGNTVkL.[Q]	P03962	URA3	0	#N/A	0	#N/A	-2.33274	#N/A	0.576496	#N/A	0.455104	#N/A		#N/A		#N/A	<-3 sigma	#N/A		#N/A		#N/A
[N].fLLFEDR.[K]	P03962	URA3	-0.811475	0.328011	-0.0065993	-0.328677	0.12599	0.0193966	0.0307466	-0.00309321	0.0505488	-0.0577547
[R].iAEWADITN.[A]	P03962	URA3	0.374072	#N/A	-0.228991	#N/A	0.279958	#N/A	0.0765057	#N/A	-0.14608	#N/A		#N/A		#N/A		#N/A		#N/A		#N/A
[E].lVEALGPk.[I]	P03962	URA3	0.490362	0.352007	0.0705095	-0.0418073	0.181198	0.125602	0.307725	0.324545	-0.0461172	0.0719153
[F].lLFEDRk.[F]	P03962	URA3	0.134495	0.333312	-0.12167	-0.13103	0.128027	-0.0295138	0.274086	0.221765	0.0238821	0.302557
[N].fLLFEDRk.[F]	P03962	URA3	0	-0.642865	0.108347	-0.351539	0.292511	0.207437	-0.12745	0.561398	0.0641232	0.16263
[Q].ySAGVYR.[I]	P03962	URA3	0.215342	0.0991444	-0.00562874	0.0812676	0.0656558	0.0634688	0.139805	0.104382	-0.0531432	0.134527
[F].lLFEDR.[K]	P03962	URA3	0.526025	0.173308	0.322276	-0.825249	0.347026	-0.359621	0.142318	-0.917932	0.119518	-0.222471				<-3 sigma				<-3 sigma
[Y].lDPEAAAAGAAAVAnQGkk.[-]	P00950	GPM1	0.12009	0.295419	0.194411	0.0954827	-0.0315135	0.182071	0.152711	-0.0360544	-0.124578	0.0450578
[R].LLPYWQDVIAkD.[L]	P00950	GPM1	0.395751	0.254811	-0.138232	0.127034	-0.101713	0.0877685	0.287631	0.0994376	-0.127981	-0.111021
[K].vYPDVLYTSkL.[S]	P00950	GPM1	0.690188	0.637703	-0.084837	-0.275445	0.0474699	0.117509	0.368233	0.0236357	-0.333083	0.0444547
[N].lFTGWVDVkLSAkGQQEAAR.[A]	P00950	GPM1	0.114523	0.510521	0.0789433	-0.197108	-0.0959716	-0.0144547	0.174878	-0.016064	-0.158762	0.0592402
[S].fDVPPPPIDASSPFSQkGDER.[Y]	P00950	GPM1	0.164683	0.403723	0.191908	0.157665	-0.15725	0.133738	0.175919	0.0502994	-0.232743	-0.0170119
[L].fTGWVDVk.[L]	P00950	GPM1	-0.11419	0.383308	-0.137993	-0.142875	-0.286646	0.0516013	0.279633	0.15149	-0.127951	0.183813
[K].vYPDVLYTSk.[L]	P00950	GPM1	0.207622	0.54437	-0.00497014	-0.0554085	-0.241186	0.0938616	0.287704	0.09509	-0.0834197	0.0244558
[K].vYPDVLYTSkLSR.[A]	P00950	GPM1	-0.058412	0.3727	-0.0796151	0.134198	-0.0366985	-0.142282	-0.00797243	0.136826	-0.0994207	0.160344
[Y].yLDPEAAAAGAAAVANQGkk.[-]	P00950	GPM1	0.276137	0.0666474	0.20206	0.113577	-0.109522	-0.0054098	0.143475	-0.0379964	-0.122233	0.00300867
[R].sFDVPPPPIDASSPFSQkGDER.[Y]	P00950	GPM1	0.143955	0.156825	-0.137509	0.0970593	0.265792	0.205603	0.177695	0.122057	-0.231075	0.0623008
[Y].yLDPEAAAAGAAAVANqGk.[K]	P00950	GPM1	0.120831	#N/A	0.214953	#N/A	0.124722	#N/A	-0.0266042	#N/A	-0.278346	#N/A		#N/A		#N/A		#N/A		#N/A		#N/A
[G].lVkHLEGISDADIAk.[L]	P00950	GPM1	0.138122	0.60283	0.0634279	0.334766	-0.18957	0.174917	0.271053	0.0417497	-0.16707	0.141653
[V].yPDVLYTSk.[L]	P00950	GPM1	0.342559	#N/A	0.201944	#N/A	0.04712	#N/A	0.185181	#N/A	-0.231616	#N/A		#N/A		#N/A		#N/A		#N/A		#N/A
[N].lFTGWVDVk.[L]	P00950	GPM1	-0.0181889	0.0946844	0.203131	-0.0841001	-0.192036	0.111523	0.262818	0.167178	-0.146673	0.369618
[K].lSAkGQQEAAR.[A]	P00950	GPM1	-0.0992784	0.226406	0.162487	-0.0273815	-0.265015	0.145123	0.163813	0.138149	0.0285353	0.147914
[R].HYGDLQGkDkAET.[L]	P00950	GPM1	0.0620584	#N/A	0.124141	#N/A	-0.167815	#N/A	0.209823	#N/A	-0.210859	#N/A		#N/A		#N/A		#N/A		#N/A		#N/A
[A].aAGAAAVANQGkk.[-]	P00950	GPM1	-0.374867	#N/A	0.160113	#N/A	-0.145464	#N/A	0.327668	#N/A	-0.150387	#N/A		#N/A		#N/A		#N/A		#N/A		#N/A
[Y].vDPNVLPETESLALVIDR.[L]	P00950	GPM1	0.259917	#N/A	-0.498239	#N/A	0.295846	#N/A	0.161444	#N/A	-0.0592186	#N/A		#N/A		#N/A		#N/A		#N/A		#N/A
[T].vMIAAHGnSLR.[G]	P00950	GPM1	0.186646	0.402075	-0.530966	-0.128901	0.0613888	-0.0166208	0.234437	0.040465	-0.0782372	-0.154371
[T].aNIALEkADR.[L]	P00950	GPM1	0.10236	0.272055	-0.177544	-0.0049814	-0.242948	-0.0690788	0.0143009	-0.102463	-0.301106	0.10965
[A].nIALEkADR.[L]	P00950	GPM1	0.357704	0.205971	0.0671832	-0.0240041	-0.0383125	0.0976578	0.240756	0.132744	-0.187648	0.0298369
[N].iALEkADR.[L]	P00950	GPM1	0.05377	0.372142	0.0307344	0.196394	-0.271668	0.078518	0.0711111	0.0993085	-0.176558	0.191062
[L].sAkGQQEAAR.[A]	P00950	GPM1	0.218189	0.410416	-0.156907	-0.0439884	-0.242778	0.109089	0.262342	0.107259	-0.0475689	0.0767083
[S].akGQQEAAR.[A]	P00950	GPM1	0.307929	0.421103	0.160974	0.295688	-0.209813	0.120052	0.195196	0.148163	-0.12719	0.0756644
[K].fGEEkFnTYR.[R]	P00950	GPM1	0.194435	0.364873	-0.0679058	-0.0534922	-0.243205	0.0737208	0.259451	0.108831	-0.162116	0.114224
[S].lALVIDR.[L]	P00950	GPM1	-0.775964	0.40343	0.59076	0.0199006	-0.481178	-0.0804639	0.097798	0.0645676	-0.130695	0.0143979
[A].aVANQGk.[K]	P00950	GPM1	0.0904641	0.103035	0.0157935	0.00216228	-0.038646	0.15659	0.0122693	0.0901414	0.0448435	0.18258
[R].lWIPVnR.[S]	P00950	GPM1	-0.791259	0.24526	-0.833916	0.110458	-0.484084	0.0214395	0.0980948	0.0716562	-0.0903088	0.246933			<-3 sigma
[K].lNIPTGIP.[L]	P00950	GPM1	0	0.536055	0	0	-1.06447	0.811693	1.02556	-0.49683	0	0.25077					<-3 sigma		>3 sigma
[A].vANQGkk.[-]	P00950	GPM1	-0.116006	0.108229	-0.158545	-0.0481958	-0.0581915	0.120347	0.115803	0.123211	-0.0489004	0.371493
[PN].kLVLVR.[H]	P00950	GPM1	0.638993	#N/A	-0.029053	#N/A	-0.527812	#N/A	0.10425	#N/A	-0.586683	#N/A		#N/A		#N/A		#N/A		#N/A		#N/A
[T].lkkFGEEkFNTYR.[R]	P00950	GPM1	0.41209	#N/A	-0.0788069	#N/A	-0.197347	#N/A	0.366104	#N/A	-0.176767	#N/A		#N/A		#N/A		#N/A		#N/A		#N/A
[I].aLEkADR.[L]	P00950	GPM1	0.225585	0.633975	-0.0221457	0.205053	-0.0267191	0.0502844	0.259835	0.0602793	-0.550491	-0.211158
[V].kLSAkGQQEAAR.[A]	P00950	GPM1	-0.117415	#N/A	0.164939	#N/A	-0.12313	#N/A	0.31729	#N/A	-0.562548	#N/A		#N/A		#N/A		#N/A		#N/A		#N/A
[L].fTGWVDVkLSAkGQQEAAR.[A]	P00950	GPM1	0.390729	0.241503	-0.134126	-0.0765207	-0.249117	-0.116979	0.163853	0.0942561	-0.19364	0.196233
[D].lQGkDkAETLkk.[F]	P00950	GPM1	0.20975	#N/A	-0.310349	#N/A	0.0590763	#N/A	0.60845	#N/A	-0.0897549	#N/A		#N/A		#N/A		#N/A		#N/A		#N/A
[A].vAnQGk.[K]	P00950	GPM1	0.0562508	#N/A	-0.1172	#N/A	0.116463	#N/A	0.116697	#N/A	-0.136479	#N/A		#N/A		#N/A		#N/A		#N/A		#N/A
[D].kEGIPAGWQGLDnGPESR.[K]	P00560	PGK1	0.099384	0.479853	-0.101065	0.285534	0.0927642	0.243472	0.178923	-0.21202	-0.217229	0.240732
[R].VDFNVPLDGkk.[I]	P00560	PGK1	-0.601191	0.0326881	-0.00181643	0.178936	0.02182	0.0129513	0.197301	0.123722	-0.152547	0.280162
[R].aAGFLLEkELkY.[F]	P00560	PGK1	0.217553	0.58681	0.0566002	0.114906	0.171124	-0.116705	0.0832495	0.0110905	-0.29314	-0.00499414
[D].fNVPLDGkk.[I]	P00560	PGK1	0.246434	0.198101	-0.128391	0.113555	-0.196141	0.129839	0.352629	0.155052	-0.121891	0.132142
[D].fNVPLDGkkITSnQR.[I]	P00560	PGK1	0.193527	0.314234	0.098027	-0.0377034	0.092914	-0.0322788	0.100137	0.038982	-0.193122	0.0953001
[E].lSSLADVYInDAFGTAHR.[A]	P00560	PGK1	0.304217	-0.546745	0.0412409	-0.0273444	0.171324	0.188479	0.0981699	-0.114374	-0.192642	-0.210663
[G].vAFLSEkk.[-]	P00560	PGK1	-0.413257	0.193174	-1.10822	0.0742605	-0.344402	-0.0455307	0.0569996	0.0888952	-0.175031	0.133704			<-3 sigma
[F].sADANTkTVTDkEGIPAGWQGLDnGPESR.[K]	P00560	PGK1	0	#N/A	0	#N/A	0	#N/A	0.465318	#N/A	0.0555442	#N/A		#N/A		#N/A		#N/A		#N/A		#N/A
[S].vQDLDLkDkR.[V]	P00560	PGK1	0.0375333	0.11683	-0.0932252	0.08973	-0.233179	0.052977	0.217724	0.13483	-0.146119	-0.0363227
[T].vAkAkTIVWnGPPGVFEFEk.[F]	P00560	PGK1	0.523206	-0.182396	0.35903	0.381769	0.104189	-0.443923	0.112446	-0.0600757	-0.366854	0.155808
[L].sVQDLDLkDkR.[V]	P00560	PGK1	0.0762673	0.289111	-0.0857091	0.171058	0.24555	-0.04995	0.340318	-0.0561135	-0.273254	-0.123134
[K].LSVQDLDLkDkR.[V]	P00560	PGK1	0.174509	0.775525	0.0448597	0.1809	-0.040026	0.139847	0.149966	0.0923882	-0.153449	0.065903
[F].iIADAFSADANTkTVTDkEGIPAGWQGLDnGPESR.[K]	P00560	PGK1	0	0	-0.496303	0.637485	-0.240993	0.470752	0.0324578	0.325311	-0.313591	0.521579
[R].aAGFLLEkE.[L]	P00560	PGK1	0.146748	0.189863	-0.109971	0.0925277	-0.124504	0.045071	0.0965769	0.00778417	-0.0924795	0.176819
[F].lAILGGAk.[V]	P00560	PGK1	0.409974	0.541289	-0.034548	-0.19427	-0.0463445	0.0751807	0.225181	0.0271276	0.0532071	-0.0247107
[S].lADVYINDAFGTAHR.[A]	P00560	PGK1	-0.0367214	0.52798	0.0426156	0.00363999	-1.18533e-05	0.0770989	0.0880541	-0.0316102	-0.090266	0.00895495
[A].aVkASAPGSVILLENLR.[Y]	P00560	PGK1	-0.0695839	0.850388	-0.378731	0.485808	-0.113182	0.285975	0.370058	0.173046	-0.246319	0.323824
[A].vkASAPGSVILLENLR.[Y]	P00560	PGK1	0.272632	0.35155	-0.156203	0.0231009	0.157571	0.097506	0.150734	0.0705254	-0.178979	0.000478233
[T].vTDkEGIPAGWQGLDnGPESR.[K]	P00560	PGK1	0.465489	0.2648	-0.286046	0.137916	-0.137839	0.172658	0.254583	-0.110231	-0.287553	-0.0389867
[S].lSSkLSVQDLDLkDkR.[V]	P00560	PGK1	-0.335605	-0.0344852	0.107464	0.210524	-0.0185685	0.0466379	0.22966	0.0967645	-0.257916	0.0471941
[A].fSADAnTkTVTDkEGIPAGWQGLDnGPESR.[K]	P00560	PGK1	0	0.72208	0	-0.0791633	-0.183016	0.199373	0.237412	-0.0976061	-0.217934	0.0326251
[S].mVGFDLPQR.[A]	P00560	PGK1	-0.0327154	0.273728	-0.0343008	-0.058562	-0.262627	0.086087	0.17192	0.0359977	-0.120309	0.189014
[A].sAPGSVILLENLR.[Y]	P00560	PGK1	0.410141	0.531336	-0.00124086	-0.109534	-0.110743	-0.0525647	0.146638	0.103459	-0.163286	0.0957195
[G].lDnGPESR.[K]	P00560	PGK1	0.10108	0.425795	-0.0170832	-0.0975558	-0.359905	0.100337	0.192431	0.0693329	-0.10588	0.165826
[V].lASHLGRPnGER.[N]	P00560	PGK1	0.480468	0.0976471	0.503867	-0.0684843	0.803924	-0.183012	-0.367456	-0.0501729	-0.120911	-0.179063
[K].vkASkEDVQk.[F]	P00560	PGK1	-0.00874358	0.306653	0.099827	0.296077	-0.333767	0.0658379	0.415521	0.0110339	-0.081733	-0.0802956
[T].iVWnGPPGVFEFEk.[F]	P00560	PGK1	0.407854	1.11363	0.162722	0.525545	-0.159576	0.177328	0.259512	-0.0416323	-0.221755	0.277002		>3 sigma
[Y].hIEEEGSR.[K]	P00560	PGK1	0.313134	0.169554	0.0032886	-0.0650355	0.166789	0.00103342	0.307968	-0.0974215	-0.21153	-0.191125
[K].fAAGTkALLDEVVkSSAAGNTVIIGGGDTAT.[V]	P00560	PGK1	0	#N/A	0.00191501	#N/A	0.671822	#N/A	0.8615	#N/A	-0.685753	#N/A		#N/A		#N/A		#N/A		#N/A		#N/A
[H].vSTGGGASLELLEGkELPGVAFLSEkk.[-]	P00560	PGK1	-0.0479037	0	-0.0860365	0.609648	0.323618	-0.353333	0.123768	0.176011	-0.334949	0.332497
[Y].inDAFGTAHR.[A]	P00560	PGK1	0.154703	0.185186	-0.0229938	-0.0734308	-0.0685564	0.0935023	0.270219	0.0645635	0.0371387	-0.019943
[T].ikYVLEHHPR.[Y]	P00560	PGK1	0.109037	-0.00598366	-0.0255299	-0.0700501	0.104836	-0.00137153	0.114285	-0.0342874	-0.253974	0.0968738
[R].iVAALPTIkYVLEHHPR.[Y]	P00560	PGK1	-1.35795	0	0.0502198	0	-0.0672951	1.07191	0.06541	0.169216	-0.354933	-0.00483117	<-3 sigma					>3 sigma
[R].iVAALPTIkY.[V]	P00560	PGK1	0.00835286	0.345928	0.0218502	-0.0323782	0.193258	-0.0835262	0.116862	0.0407222	-0.106449	0.0699859
[E].lLEGkELPGVAFLSEkk.[-]	P00560	PGK1	0.0929065	0.275592	0.266814	0.109721	-0.149736	0.0587298	0.0534393	-0.0370958	-0.259043	0.0989527
[Y].vVLASHLGRPnGER.[N]	P00560	PGK1	0.15438	0.159582	-0.204801	-0.0691823	0.0278516	-0.0191578	0.0537678	-0.0220091	-0.259085	0.03813
[M].vGFDLPQR.[A]	P00560	PGK1	-0.092005	0.275858	-0.14324	0.0569785	-0.218129	0.121246	0.0592897	0.173117	-0.10238	0.0255191
[K].vkASkEDVQkFR.[H]	P00560	PGK1	0.0610535	#N/A	-0.347802	#N/A	-0.108891	#N/A	0.23587	#N/A	-0.104568	#N/A		#N/A		#N/A		#N/A		#N/A		#N/A
[H].iEEEGSR.[K]	P00560	PGK1	0.0432843	0.0915863	0.235644	0.0896525	-0.305077	0.0988401	0.2068	0.0575608	-0.0737174	0.0359756
[K].vDGQkVkASkEDVQk.[F]	P00560	PGK1	0.178267	0.733033	0.0832829	0.335477	0.0153935	0.23967	0.448419	0.0941197	-0.369801	0.200397
[G].vTDkISHVSTGGGASLELLEGkELPGVAFLSEkk.[-]	P00560	PGK1	0	#N/A	-0.212507	#N/A	0.298524	#N/A	-0.0346997	#N/A	-0.367141	#N/A		#N/A		#N/A		#N/A		#N/A		#N/A
[A].fLSEkk.[-]	P00560	PGK1	-0.0534245	#N/A	-0.0974976	#N/A	0.119333	#N/A	0.224203	#N/A	-0.137631	#N/A		#N/A		#N/A		#N/A		#N/A		#N/A
[Y].vLEHHPR.[Y]	P00560	PGK1	-0.512825	0.282076	-0.363214	0.192574	-0.661738	-0.0335158	0.147735	-0.0789248	-0.094024	0.174977
[K].aSkEDVQkFR.[H]	P00560	PGK1	0.308615	#N/A	0.267342	#N/A	0.060274	#N/A	0.148074	#N/A	-0.205115	#N/A		#N/A		#N/A		#N/A		#N/A		#N/A
[V].qDLDLkDkR.[V]	P00560	PGK1	0.258505	0.370114	-0.0104708	0.105065	0.173713	-0.0422753	0.366494	-0.049767	-0.401734	-0.0973508
[P].lDGkkITSnQR.[I]	P00560	PGK1	0.164522	#N/A	0.231036	#N/A	0.0823425	#N/A	0.211207	#N/A	-0.153982	#N/A		#N/A		#N/A		#N/A		#N/A		#N/A
[K].fAAGTkA.[L]	P00560	PGK1	0.338501	-0.0691547	0.0331233	-0.16148	-0.288337	0.072169	0.330144	0.0736342	-0.115579	0.0788659
[H].lGRPnGER.[N]	P00560	PGK1	0.179768	-0.132365	0.465035	0.0575105	0.0859624	0.0856556	-0.063491	0.0252724	-0.0819862	0.125752
[N].dAFGTAHR.[A]	P00560	PGK1	0.150586	#N/A	0.00132116	#N/A	-0.015316	#N/A	0.0556042	#N/A	-0.258304	#N/A		#N/A		#N/A		#N/A		#N/A		#N/A
[R].iVAALPT.[I]	P00560	PGK1	0	0	0	0	-0.999851	-0.020572	0.196886	0.0447878	0.0491536	0.0639025					<-3 sigma
[Q].iVADDLTVTNPkR.[I]	P00924	ENO1	-0.0249072	0.266658	0.355962	0.0455878	0.109346	0.0377363	0.258328	0.000820975	-0.221885	0.198745
[F].lISLDGTANkSk.[L]	P00924	ENO1	0.0418214	#N/A	-0.00120994	#N/A	0.261266	#N/A	0.315299	#N/A	-0.042779	#N/A		#N/A		#N/A		#N/A		#N/A		#N/A
[I].vADDLTVTNPkR.[I]	P00924	ENO1	0.335983	#N/A	0.00259651	#N/A	0.170397	#N/A	0.182143	#N/A	-0.169682	#N/A		#N/A		#N/A		#N/A		#N/A		#N/A
[G].iQIVADDLTVTNPkR.[I]	P00924	ENO1	0.136072	0.4265	0.535943	-0.0590019	0.177301	0.0402321	0.0603528	-0.00469168	-0.357767	0.0610094
[T].aGIQIVADDLTVTNPkR.[I]	P00924	ENO1	0.205299	0.222667	-0.0939197	-0.049748	-0.0339493	0.18041	0.109166	0.0262057	-0.131646	0.141086
[F].fkTAGIQIVADDLTVTNPkR.[I]	P00924	ENO1	0	0.64521	0.13493	-0.544165	-0.208496	-0.481592	-0.101049	0.187962	-0.257761	0.00622138
[M].iAPTGAkTFAEALR.[I]	P00924	ENO1	-0.18662	-0.0610973	-1.23471	-0.108745	-0.0332399	-0.0627573	-0.150025	0.00328718	-0.317187	0.0363506			<-3 sigma
[N].iDVkDQkAVDDFLISLDGTANkSk.[L]	P00924	ENO1	0	#N/A	0.868318	#N/A	0.360248	#N/A	0.529681	#N/A	0.142697	#N/A		#N/A		#N/A		#N/A		#N/A		#N/A
[A].fVkANIDVkDQk.[A]	P00924	ENO1	-0.0657173	-1.01743	0.27284	-0.20539	0.106099	-0.0102347	0.341528	0.16121	-0.277894	0.116755		<-3 sigma
[K].aVDDFLIS.[L]	P00924	ENO1	0	0	0	0.19597	1.25799	-0.426441	0.723798	0.646104	1.10466	0					>3 sigma				>3 sigma
[L].iSLDGTANkSk.[L]	P00924	ENO1	0.103672	0.103627	0.168278	-0.133171	0.0996345	0.158163	0.310657	0.119869	-0.0507441	0.050013
[Q].vAVEVkNAnDLPk.[L]	P32324	EFT1	0.161771	0.287894	-0.142491	-0.0795711	0.162137	0.0289168	0.200909	-0.0374379	-0.195576	-0.0754642
[A].aFQWATkEGPIFGEEMR.[S]	P32324	EFT1	0.0132792	#N/A	-0.146067	#N/A	0.120926	#N/A	-0.0407464	#N/A	-0.391499	#N/A		#N/A		#N/A		#N/A		#N/A		#N/A
[M].lYVSkMVPTSDkGR.[F]	P32324	EFT1	0.117679	0.253778	0.296157	0.00988484	0.0414618	0.0544169	0.254744	0.0278577	-0.0393455	0.100621
[A].vGGIYSVLNkkR.[G]	P32324	EFT1	0.793845	-0.258709	-0.318208	-0.510771	0.0441706	0.0779621	0.240992	0.200017	-0.167306	0.269327
[A].fQWATkEGPIFGEEMR.[S]	P32324	EFT1	0.269148	-0.152462	-0.00491917	-0.00419473	0.1608	-0.00655848	0.207589	0.117039	-0.149213	0.00613269
[S].vIAHVDHGkSTLTDSLVQR.[A]	P32324	EFT1	0.478297	-0.00354376	0.142611	0.220615	0.0626728	0.0178778	0.122649	0.109597	-0.185214	0.123238
[P].vVVINkVDR.[A]	P32324	EFT1	-0.0712036	0.322918	-0.200164	0.156426	0.0253848	-0.208508	0.15987	0.0897145	0.0265477	0.2001
[T].lTDSLVQR.[A]	P32324	EFT1	0.0270685	0.218444	4.52973e-05	0.0484468	0.15382	-0.0122511	0.166667	0.0341734	-0.197084	0.0884553
[W].aTkEGPIFGEEMR.[S]	P32324	EFT1	-0.0551735	0.121574	-0.0920912	-0.163757	0.0922671	0.0281623	0.243104	-0.0271546	-0.168052	0.0447744
[R].iMADDYGWDVTDAR.[K]	P32324	EFT1	0.335669	0.452154	0.000822398	-0.156684	0.126904	0.0778004	0.16858	0.0382525	-0.117046	-0.101369
[C].lQDLEHDHAGVPLkISPPVVAYR.[E]	P32324	EFT1	0.17976	0.32122	0.147173	-0.057299	0.375722	-0.0631477	0.317102	0.0622961	-0.168183	0.368973
[T].lGSDPLDPTSkAGEIVLAAR.[K]	P32324	EFT1	0.502081	0.613891	0.125047	-0.0557122	0.328477	0.0727695	0.230688	0.105386	-0.26649	-0.00457066
[G].mkEEVPGWQEYYDkL.[-]	P32324	EFT1	0.554026	0.140218	-0.00583861	0.0277806	0.235178	0.116886	0.32462	0.102492	-0.208659	-0.190099
[S].lAIEnGIINPR.[D]	P32324	EFT1	0	-0.610858	0	-0.230735	-0.0456186	0.0860075	0.316154	0.106143	-1.32035	0.0603889									<-3 sigma
[H].gMkEEVPGWQEYYDkL.[-]	P32324	EFT1	0.743888	#N/A	0.252377	#N/A	-0.0936196	#N/A	0.074522	#N/A	-0.325529	#N/A		#N/A		#N/A		#N/A		#N/A		#N/A
[Y].lkAEPIDEEVSLAIEnGIINPR.[D]	P32324	EFT1	0.512531	-1.49064	0.116937	-0.132673	0.0894301	-0.209526	0.125385	-0.0521064	-0.123881	0.34992		<-3 sigma
[Q].mVFDHWSTLGSDPLDPTSkAGEIVLAAR.[K]	P32324	EFT1	-0.0282551	#N/A	-0.0379425	#N/A	-0.421413	#N/A	0.276354	#N/A	-0.437532	#N/A		#N/A		#N/A		#N/A		#N/A		#N/A
[M].vFDHWSTLGSDPLDPTSkAGEIVLAAR.[K]	P32324	EFT1	0.818812	#N/A	0.154765	#N/A	0.311323	#N/A	0.00136633	#N/A	-0.535588	#N/A		#N/A		#N/A		#N/A		#N/A		#N/A
[S].aAkAGEAR.[F]	P32324	EFT1	0.0151967	0.185562	-0.00216864	-0.212615	0.025269	0.0809749	0.308584	0.0371748	0.00770528	0.220551
[F].lINLIDSPGHVDFSSEVTAALR.[V]	P32324	EFT1	-0.0962729	#N/A	1.101	#N/A	0.269523	#N/A	-0.00390597	#N/A	-0.21228	#N/A		#N/A	>3 sigma	#N/A		#N/A		#N/A		#N/A
[G].iISAAkAGEAR.[F]	P32324	EFT1	0.143199	0.135869	0.0111875	0.0189436	0.140127	0.0247217	0.109862	0.114488	-0.109517	0.105287
[H].vDHGkSTLTDSLVQR.[A]	P32324	EFT1	0.0446622	0.0897116	-0.0898849	-0.175553	0.0885276	0.107178	0.234098	0.0743764	-0.232392	0.0688803
[S].lMDkVTNVR.[N]	P32324	EFT1	0.0957932	-0.00407152	-0.147372	0.0733226	-0.0500295	0.040163	0.182029	0.078896	-0.118776	0.210919
[K].iSPPVVAYR.[E]	P32324	EFT1	0.133273	0.111339	-0.0280295	0.119654	0.118816	0.0557414	0.293007	0.161593	-0.213742	0.15751
[M].vAFTVDQmR.[S]	P32324	EFT1	0.0645037	0.0814203	0.0285395	-0.0871387	0.15583	0.0769348	0.0967847	0.00413093	-0.234756	-0.024865
[R].iQGPNYVPGkkDDLF.[I]	P32324	EFT1	0.0680685	#N/A	0.0779649	#N/A	-0.127982	#N/A	0.185042	#N/A	-0.123859	#N/A		#N/A		#N/A		#N/A		#N/A		#N/A
[P].vVQVAVEVkNANDLPk.[L]	P32324	EFT1	-0.00199429	#N/A	0.0373294	#N/A	0.111776	#N/A	0.45976	#N/A	-0.261689	#N/A		#N/A		#N/A		#N/A		#N/A		#N/A
[S].fGFTGELR.[Q]	P32324	EFT1	0.225438	0.059666	0.410544	-0.0331202	0.380121	-0.0901919	0.097604	-0.0295778	-0.130818	0.0430126
[A].fTVDQMR.[S]	P32324	EFT1	0.148502	0.308843	-0.171318	0.0343408	-0.100891	-0.00246697	0.21019	0.107787	-0.0979581	0.0517445
[R].lSkSDPcVLTY.[M]	P32324	EFT1	0.0175275	#N/A	-0.192657	#N/A	0.19827	#N/A	0.388207	#N/A	-0.01166	#N/A		#N/A		#N/A		#N/A		#N/A		#N/A
[A].lSkSPnkHNR.[I]	P32324	EFT1	-0.0957882	#N/A	0.0767389	#N/A	-0.0351219	#N/A	0.352938	#N/A	-0.235838	#N/A		#N/A		#N/A		#N/A		#N/A		#N/A
[T].lLEAIDAIEqPSRPTDkPLR.[L]	P02994	TEF1	-0.087713	0.254765	0.095696	-0.0737837	0.0682588	0.0589689	0.201107	0.064567	-0.170462	0.0644069
[K].iGGIGTVPVGR.[V]	P02994	TEF1	0.0950954	0.15511	-0.070441	-0.0598655	0.16124	0.0643242	0.118965	0.0479248	-0.0971697	0.00228919
[L].rLPLQDVYk.[I]	P02994	TEF1	0.140612	#N/A	0.0867702	#N/A	0.150255	#N/A	-0.0101617	#N/A	-0.0411781	#N/A		#N/A		#N/A		#N/A		#N/A		#N/A
[E].iVkETSNFIkk.[V]	P02994	TEF1	-0.0278988	0.240536	-0.0482588	-0.246687	0.108546	0.0307991	0.21158	0.396505	-0.130422	-0.00423736
[L].lEAIDAIEQPSRPTDkPLRLPLQDVYk.[I]	P02994	TEF1	0	#N/A	0.0358786	#N/A	-0.1192	#N/A	0.402148	#N/A	-0.516551	#N/A		#N/A		#N/A		#N/A		#N/A		#N/A
[R].FQEIVkETSNF.[I]	P02994	TEF1	0.20511	#N/A	-0.0466245	#N/A	0.208033	#N/A	0.211595	#N/A	-0.0532444	#N/A		#N/A		#N/A		#N/A		#N/A		#N/A
[T].fAPAGVTTEVk.[S]	P02994	TEF1	0.133185	#N/A	0.208935	#N/A	0.055713	#N/A	0.202007	#N/A	-0.294541	#N/A		#N/A		#N/A		#N/A		#N/A		#N/A
[R].fDELLEknDRR.[S]	P02994	TEF1	0.173967	0.151282	0.0251335	-0.0794995	0.117535	0.0753238	0.257152	0.0448968	0.000135668	-0.013516
[G].vVkGkTLLEAIDAIEQPSRPTDkPLR.[L]	P02994	TEF1	0.0523421	0	-0.178538	0.203463	-0.316084	-0.26498	0.148124	0.408817	-0.258043	0.307584
[A].vNkMDSVkWDESR.[F]	P02994	TEF1	0.229792	0.171707	-0.129842	-0.125971	0.20561	0.213795	0.223951	0.0572968	-0.0494733	-0.00285426
[Y].aWVLDkLkAER.[E]	P02994	TEF1	0.176735	0.21635	-0.148185	-0.364374	0.207054	0.0999387	0.256352	0.114271	-0.15723	0.0966579
[C].vEAFSEYPPLGR.[F]	P02994	TEF1	0.300895	0.345553	-0.0562982	-0.0638853	0.221603	0.137721	0.18525	0.189347	-0.154221	0.0175508
[Q].lIVAVNkMDSVkWDESR.[F]	P02994	TEF1	0.3136	0.320912	-0.0776208	-0.0568712	0.0475366	0.00621503	0.238305	0.121034	-0.065253	0.227015
[P].lQDVYkIGGIGTVPVGR.[V]	P02994	TEF1	0.146626	0.344877	0.229997	-0.0413646	-0.0424854	0.11338	0.21721	0.0152458	-0.226164	0.0158332
[T].fAPAGVTTEVkSVEMHHEQLEQGVPGDNVGFNVk.[N]	P02994	TEF1	0	0.109639	-0.0246528	-1.70234	0.0417212	-0.499297	0.543444	0.0245606	-0.14734	-0.214922				<-3 sigma
[L].iIAGGVGEFEAGISkDGQTR.[E]	P02994	TEF1	0.418545	0.00638937	-0.0489296	0.0498993	0.303911	-0.199597	0.316517	0.0367672	-0.00589706	-0.196939
[A].iDAIEQPSRPTDkPLRLPLQDVYk.[I]	P02994	TEF1	-0.0268822	1.36243	-0.00553456	-0.10829	0.183767	0.0407232	0.269632	0.267443	-0.255188	-0.15213		>3 sigma
[K].vGYNPkTVPFVP.[I]	P02994	TEF1	0.264051	0.231667	0.0366218	-0.0958725	0.193034	0.157414	0.27673	0.077447	-0.212665	-0.109769
[L].iVAVNkMDSVkWDESR.[F]	P02994	TEF1	0.155952	0.281546	-0.00908179	-0.207372	0.20935	0.0266818	0.187746	0.115266	-0.0665197	0.00828723
[A].lVkFVPSkPmcVEAFSEYPPLGR.[F]	P02994	TEF1	0.217257	-0.630816	-0.187995	-0.343494	-0.284327	-0.0851936	-0.0219287	-0.0942497	-0.73801	-0.146518
[T].lLEAIDAIEQPSRPTDkPLRLPLQDVYk.[I]	P02994	TEF1	0	0	0.203081	-0.223037	-0.105042	0.182051	0.250431	-0.0187632	-0.0674885	0
[E].lLEknDRR.[S]	P02994	TEF1	0.177244	-0.0408208	-0.0504156	-0.146308	0.10158	0.0638395	0.181646	0.102268	-0.0815181	0.136343
[P].mcVEAFSEYPPLGR.[F]	P02994	TEF1	1.42776	0	-0.372918	-0.378231	-0.0829095	1.46834	0.197564	1.60662	-0.351192	-0.0067697	>3 sigma					>3 sigma		>3 sigma
[R].SGkkLEDHPkF.[L]	P02994	TEF1	0.169432	0.377747	-0.197917	-0.0452849	0.21294	0.0345473	0.314509	0.114803	-0.282619	-0.199938
[K].vTkAAQkAAkk.[-]	P02994	TEF1	-0.10517	0.23872	-0.185768	-0.126509	0.305886	0.0137636	0.421493	-0.0145728	0.213214	0.344484
[K].fVPSkPMcVEAFSEYPPLGR.[F]	P02994	TEF1	0.249071	#N/A	-0.133121	#N/A	0.128254	#N/A	0.120583	#N/A	-0.333058	#N/A		#N/A		#N/A		#N/A		#N/A		#N/A
[K].vGYNPkTVPFVPISGWnGDNM.[I]	P02994	TEF1	0.121831	0	0.177368	0.377611	0.0924137	0.171753	0.308131	0.573681	-0.386015	0.180046
[R].SGkkLEDHPk.[F]	P02994	TEF1	0.318733	#N/A	-0.054943	#N/A	0.189354	#N/A	0.329962	#N/A	-0.0519484	#N/A		#N/A		#N/A		#N/A		#N/A		#N/A
[A].iDAIEQPSRPTDkPLR.[L]	P02994	TEF1	0.090558	0.0807791	0.11028	-0.0144998	0.246908	0.00975317	0.248191	0.101746	-0.238546	0.110043
[A].fSEYPPLGR.[F]	P02994	TEF1	0.181981	0.180692	0.0201147	0.0113786	0.197407	0.162304	0.208124	0.152011	-0.104309	-0.116377
[Q].vTVIDAPGHR.[D]	P02994	TEF1	0.0296947	0.247061	-0.197378	-0.109112	0.239747	0.0813679	0.320276	0.101469	-0.165458	-0.116882
[T].vAVGVIkSVDkTEkAAk.[V]	P02994	TEF1	0.368662	0.480995	0.158427	-0.117583	0.277505	0.124753	0.22034	0.334146	-0.273741	-0.175755
[K].vTkAAQk.[A]	P02994	TEF1	-0.0408328	0.246512	-0.0623183	-0.203769	-0.167786	0.584162	0.0709152	-0.469524	0.406587	-1.29972										<-3 sigma
[D].vYkIGGIGTVPVGR.[V]	P02994	TEF1	0.290469	0.324076	0.144145	-0.0185178	0.0514308	-0.00412551	0.172012	0.230932	-0.201832	-0.0582195
[R].LPLQDVYk.[I]	P02994	TEF1	-0.00236911	0.161399	0.00348389	-0.068897	0.190103	0.0678819	0.231321	0.139652	-0.134652	-0.0256612
[A].aQkAAkk.[-]	P02994	TEF1	0.147882	0.212539	-0.175108	-0.0562087	0.10545	0.0812856	0.308736	-0.0926215	-0.125174	0.0493066
[R].fDELLEkNDR.[R]	P02994	TEF1	0.0551979	0.180079	0.0276822	-0.0616602	0.0117321	-0.0602402	0.182663	0.0615227	-0.111854	-0.0454451
[W].vLDkLkAER.[E]	P02994	TEF1	0.101907	-0.0171918	-0.160386	-0.0370709	0.121065	-0.135794	0.0653976	0.225376	0.0298988	0.217516
[K].vGYNPkTVP.[F]	P02994	TEF1	0.166387	0.199144	-0.107859	-0.0249073	0.203762	0.256251	0.327314	0.169443	-0.267477	0.00981636
[K].vTkAAQkA.[A]	P02994	TEF1	0.0830266	0.0198546	-0.0750943	-0.00508565	0.127114	-0.0615852	0.288707	-0.0317631	0.337535	-0.0630555
[K].iGGIGTVP.[V]	P02994	TEF1	0.234991	0.188452	0.190919	-0.259562	-0.0014143	0.683693	0.040829	-1.59344	-0.00524565	-0.0075727								<-3 sigma
[K].fLkSGDAALVk.[F]	P02994	TEF1	0.221088	#N/A	-0.0683898	#N/A	-0.029824	#N/A	0.128825	#N/A	-0.111887	#N/A		#N/A		#N/A		#N/A		#N/A		#N/A
[T].vAVGVIkSVDkTEk.[A]	P02994	TEF1	-0.155512	#N/A	-0.133239	#N/A	0.105198	#N/A	0.189975	#N/A	0.00273746	#N/A		#N/A		#N/A		#N/A		#N/A		#N/A
[E].aFSEYPPLGR.[F]	P02994	TEF1	0.2685	0.307452	-0.118434	-0.0783773	0.0962145	0.127541	0.329571	0.216318	-0.079553	-0.0997872
[S].vDkTEkAAk.[V]	P02994	TEF1	0.0510737	0.0855738	-0.176024	0.0531358	0.185891	0.0960207	0.315613	0.129266	-0.255947	-0.130885
[G].iGTVPVGR.[V]	P02994	TEF1	-0.0160362	0.0508266	-0.0539007	-0.0649248	0.111713	0.176308	0.228923	0.118336	-0.280723	-0.142061
[G].iSkDGQTR.[E]	P02994	TEF1	-0.00997085	#N/A	-0.0819934	#N/A	0.119142	#N/A	0.192	#N/A	-0.335939	#N/A		#N/A		#N/A		#N/A		#N/A		#N/A
[K].lEDHPkF.[L]	P02994	TEF1	0.0719813	0.129461	-0.041077	-0.0165139	0.20631	0.082729	0.232648	-0.0429441	-0.109627	-0.0920579
[K].lEDHPk.[F]	P02994	TEF1	-0.114599	0.114381	-0.178726	-0.0595052	-0.0693296	0.12896	-0.30315	0.249598	-0.123755	0.274854
[T].lLEAIDAIEQPSRPTDkPLRLPLQDVYkIGGIGTVPVGR.[V]	P02994	TEF1	0	#N/A	0	#N/A	0.175756	#N/A	0.223197	#N/A	-0.291352	#N/A		#N/A		#N/A		#N/A		#N/A		#N/A
[K].fVPSkPMcVEA.[F]	P02994	TEF1	-0.310975	#N/A	-0.12183	#N/A	0.238045	#N/A	0.190433	#N/A	-0.0768125	#N/A		#N/A		#N/A		#N/A		#N/A		#N/A
[K].vVITAPSSSAPMF.[V]	P00360	TDH1	0.986174	#N/A	-0.193548	#N/A	0.0783711	#N/A	0.341306	#N/A	-0.159625	#N/A	>3 sigma	#N/A		#N/A		#N/A		#N/A		#N/A
[L].iSWYDNEYGYSAR.[V]	P00360	TDH1	0.452661	0.859258	0.0268797	0.229256	0.257936	0.381577	-0.00303834	0.242492	-0.128135	0.0697744
[H].iIIDGVkIATYQER.[D]	P00360	TDH1	0.0681985	1.84712	-0.0287794	-0.30645	0.0536187	-0.160763	-0.0547641	0.195042	-0.0471525	0.027781		>3 sigma
[M].lGLDPEIVSHSR.[I]	P16521	YEF3	0.269663	0.414193	0.130389	-0.114756	0.103247	-0.0126063	0.115917	-0.0134145	0.00204375	-0.0681325
[A].aATAAMTkATETVDNkDIER.[F]	P16521	YEF3	0.193143	1.14035	0.0947951	-0.0518578	0.193613	0.00608461	0.195047	0.155458	-0.323798	0.040776		>3 sigma
[G].lkSNFATIADPEAR.[E]	P16521	YEF3	0.147654	0.5882	0.0403298	-0.0514931	-0.0434581	-0.084685	0.0521958	-0.00454533	-0.338247	0.0329536
[K].mVAEVDMkEALASGQFRPLTR.[K]	P16521	YEF3	0.261616	0.781138	0.0679795	-0.218812	0.185036	-0.0258394	0.116218	-0.097064	-0.38428	-0.129619
[R].iAVIGPnGAGkST.[L]	P16521	YEF3	-0.0900967	0.143603	0.0131624	-0.0818765	0.0877752	-0.00806233	0.196754	0.169739	-0.0956919	0.201728
[A].iGADLIDER.[I]	P16521	YEF3	0.247381	0.142052	-0.024299	-0.2406	0.191151	0.0126723	0.299462	0.0741213	0.0783317	0.0980766
[A].mVDAAkDQVALR.[M]	P16521	YEF3	0.0361013	0.409367	0.0314969	-0.0443357	0.0312064	0.0725708	0.222957	0.202268	-0.100044	0.106869
[E].lLkDETVAPR.[F]	P16521	YEF3	0.0853365	0.108438	-0.00336846	-0.0503379	0.211999	0.0930974	0.205054	0.114437	-0.117384	0.00546931
[A].lASGQFRPLTR.[K]	P16521	YEF3	0.39269	0.219935	0.15468	-0.00558027	0.237843	0.123371	0.0635597	0.080785	0.0468913	0.093424
[N].fATIADPEAR.[E]	P16521	YEF3	0.155177	0.190515	-0.121402	-0.104332	-0.000228426	0.118454	0.0666111	-0.0569877	-0.151967	-0.119593
[R].iEkkEDEEDkFDAMGNk.[I]	P16521	YEF3	0.00878495	#N/A	-0.114167	#N/A	-0.0677655	#N/A	0.151922	#N/A	-0.0579539	#N/A		#N/A		#N/A		#N/A		#N/A		#N/A
[A].iVETNkWQEk.[I]	P16521	YEF3	-0.337869	0.218816	-0.035316	-0.135904	0.0931285	0.114299	0.350746	0.152811	-0.106064	-0.0959407
[E].lGDAYVSSDEEF.[-]	P16521	YEF3	-0.0377012	0.117257	0.0433808	-0.059606	0.160714	0.0974597	0.187508	-0.143806	-0.109631	0.0438461
[A].iSAMVDAAkDQVALR.[M]	P16521	YEF3	0.181469	0.669259	-0.0286921	0.0117397	0.01512	-0.0190759	0.122638	0.150732	-0.204097	0.0238893
[E].vkAAATAAMTkATETVDNkDIER.[F]	P16521	YEF3	0.513834	2.02444	0.148905	-0.270284	-0.0956799	0.123828	0.456181	-0.0125463	-0.256612	-0.0504232		>3 sigma
[E].fTkNLTEEVWAVkDGR.[M]	P16521	YEF3	0.0493558	1.27723	-0.131259	0.0722892	0.0662295	-0.232184	0.041667	0.169347	-0.0777217	0.13516		>3 sigma
[Q].vVNELLkDETVAPR.[F]	P16521	YEF3	0.401122	0.319972	0.0577249	-0.0903746	-0.0182747	0.111705	-0.0683704	0.319976	0.0561059	0.231589
[Y].iINYEGLkLR.[K]	P16521	YEF3	0.213978	0.406239	-0.101749	-0.278873	0.347176	0.00263414	0.276538	0.247802	0.240136	-0.125702
[H].lDkTPSEYIQWR.[F]	P16521	YEF3	0.245902	0.435438	0.215498	-0.10146	-0.0691858	-0.108401	0.0789104	0.102802	0.0165693	-0.111624
[S].mLGLDPEIVSHSR.[I]	P16521	YEF3	-0.0128919	0.720028	-0.179748	-0.102096	0.130385	-0.0970416	0.100261	-0.249832	-0.11317	-0.657689
[T].aAMTkATETVDNkDIER.[F]	P16521	YEF3	0.438839	0.299148	-0.0472332	-0.0460349	0.252221	0.0371672	0.188401	0.0395037	-0.197057	0.0275525
[R].fQTGEDRETMDR.[A]	P16521	YEF3	0.0937308	-0.0379899	-0.0446916	0.179394	0.0854517	-0.0014794	0.0588053	-0.144157	0.395063	0.305032
[K].lVEDPQVIAPF.[L]	P16521	YEF3	0.115158	1.32497	-0.128364	-0.219954	0.196758	0.0287259	0.152473	0.153303	-0.0590282	0.376634		>3 sigma
[R].fQTGEDRET.[M]	P16521	YEF3	-0.142259	0.111509	0.0383191	0.0486221	-0.178058	0.992884	-0.494164	-0.163578	-0.134645	0.0452339						>3 sigma
[F].lGkLLPGLkSNFATIADPEAR.[E]	P16521	YEF3	-0.702195	#N/A	-0.257892	#N/A	0.0253102	#N/A	0.1952	#N/A	-0.306801	#N/A		#N/A		#N/A		#N/A		#N/A		#N/A
[K].lSVATADNR.[H]	P16521	YEF3	-0.0778592	0.172656	-0.119434	0.0890475	0.267975	0.116049	0.185392	0.184136	-0.199818	0.0129582
[K].aTETVDNkDIER.[F]	P16521	YEF3	-0.0225991	#N/A	-0.167559	#N/A	0.274704	#N/A	0.161394	#N/A	-0.0327004	#N/A		#N/A		#N/A		#N/A		#N/A		#N/A
[T].lSIMVPLLSR.[G]	P16521	YEF3	-0.43317	#N/A	-0.331626	#N/A	0.276019	#N/A	0.0070752	#N/A	-0.120475	#N/A		#N/A		#N/A		#N/A		#N/A		#N/A
[S].ikVLEELFQk.[L]	P16521	YEF3	-0.19451	-0.199385	-0.087466	-0.166447	0.256121	0.0392435	0.233304	0.347494	-0.350906	0.477539
[W].vSGqGAGPR.[I]	P16521	YEF3	-0.0682128	0.133387	-0.035618	-0.0949742	0.239833	0.196462	0.135201	-0.0476776	-0.163716	0.298947
[K].lVEDPQVIAPFLGk.[L]	P16521	YEF3	0.566662	0.0990133	-0.0471436	0.0793401	0.271444	0.239224	0.226488	0.598896	-0.226589	0.367306
[A].mTkATETVDNkDIER.[F]	P16521	YEF3	0.0161264	0.0647923	0.0236964	-0.0827542	0.207387	0.156838	0.166602	0.340476	-0.231938	0.365986
[T].lQVVNELLkDETVAPR.[F]	P16521	YEF3	-0.0724235	0.424732	0.0170637	0.0130662	0.195413	0.0593518	0.225621	0.22335	-0.130816	-0.00495351
[E].vWAVkDGR.[M]	P16521	YEF3	0.11284	0.144691	-0.107011	-0.165872	0.17348	0.149419	0.156345	0.0938014	0.0750291	0.320011
[L].lGENIGMkSER.[W]	P16521	YEF3	0.0861725	0.232857	0.01119	0.0945102	0.123105	0.00369292	0.157846	0.112472	-0.104106	0.035888
[K].lLPGLkSNFATIADPEAR.[E]	P16521	YEF3	-0.105393	#N/A	-0.169544	#N/A	-0.163199	#N/A	0.0980433	#N/A	-0.125628	#N/A		#N/A		#N/A		#N/A		#N/A		#N/A
[M].vDAAkDQVALR.[M]	P16521	YEF3	0.0509684	0.304096	-0.0340638	0.0199347	0.110225	0.105885	0.163473	0.108178	-0.125995	0.11484
[R].iAVIGPnGAGkSTLINV.[L]	P16521	YEF3	-0.34604	#N/A	-0.245612	#N/A	0.106316	#N/A	0.243489	#N/A	-0.0681915	#N/A		#N/A		#N/A		#N/A		#N/A		#N/A
[L].iVLDEPTNYLDR.[D]	P16521	YEF3	0.459228	-0.15875	0.0414638	-0.0609561	0.157509	0.109607	0.411718	0.0780674	-0.169982	-0.0698012
[A].aISAMVDAAkDQVALR.[M]	P16521	YEF3	0.273946	#N/A	0.0332569	#N/A	-0.18809	#N/A	0.219299	#N/A	-0.107895	#N/A		#N/A		#N/A		#N/A		#N/A		#N/A
[F].qTGEDRETMDR.[A]	P16521	YEF3	-0.108561	0.268791	-0.105099	0.0871503	0.424339	0.377106	0.00194676	0.11436	0.0257325	0.00655773
[A].aTAAMTkATETVDNkDIER.[F]	P16521	YEF3	0.510997	#N/A	0.0808341	#N/A	0.127921	#N/A	0.22467	#N/A	-0.251455	#N/A		#N/A		#N/A		#N/A		#N/A		#N/A
[F].lLGENIGmkSER.[W]	P16521	YEF3	0.130305	0.267663	-0.0588441	0.0136434	0.215076	0.0294984	0.234254	0.146778	-0.0698053	0.184336
[K].mVAEVDMkEA.[L]	P16521	YEF3	0.0607942	#N/A	0.291703	#N/A	0.318572	#N/A	0.368376	#N/A	0.0367178	#N/A		#N/A		#N/A		#N/A		#N/A		#N/A
[T].iADPEAR.[E]	P16521	YEF3	-0.00797992	0.256619	-0.027325	-0.10635	0.119324	0.0610782	0.149194	0.0722713	-0.0386394	0.200253
[F].aTIADPEAR.[E]	P16521	YEF3	0.218227	#N/A	-0.0289216	#N/A	0.17702	#N/A	0.271125	#N/A	-0.115461	#N/A		#N/A		#N/A		#N/A		#N/A		#N/A
[E].lVESHSk.[M]	P16521	YEF3	-0.0502443	-0.038479	-0.0729038	-0.270852	0.0151737	0.0795199	0.507677	0.0554633	0.107064	0.0946107
[Q].vIAPFLGk.[L]	P16521	YEF3	0.488687	#N/A	0.073921	#N/A	0.0140614	#N/A	0.250067	#N/A	-0.157931	#N/A		#N/A		#N/A		#N/A		#N/A		#N/A
[Y].iAAIGADLIDER.[I]	P16521	YEF3	0.08426	-0.290729	-0.201703	-0.258461	0.208892	-0.30758	0.257667	0.0079252	-0.21357	-0.0735253
[K].iVVEYIAA.[I]	P16521	YEF3	0	0	0.260264	-0.502522	1.13556	-0.224771	-0.158526	-1.96365	-0.0779224	1.41513					>3 sigma			<-3 sigma		>3 sigma
[F].lHEkkAkDILDEFR.[K]	P16521	YEF3	0.618251	0	0.0997782	-0.00201984	0.00414201	0.0702949	0.405797	-0.267331	-0.0251187	0.066318
[T].vDNkDIER.[F]	P16521	YEF3	-0.00740523	0.114015	-0.0718327	-0.0916112	0.021175	-0.00442642	0.215953	-0.0157714	-0.0411028	-0.359521
[RS].iAGIHSR.[RS]	P16521	YEF3	0.0623699	0.263044	0.0134395	-0.240545	0.193419	0.0920849	0.148365	0.0637246	0.0184626	-0.00269887
[T].iFLHEkkAkDILDEFR.[K]	P16521	YEF3	0	#N/A	0.215813	#N/A	-0.224981	#N/A	-0.0480974	#N/A	0.0593257	#N/A		#N/A		#N/A		#N/A		#N/A		#N/A
[A].vNPVAIk.[A]	P16521	YEF3	0.224613	#N/A	-0.0323432	#N/A	0.266163	#N/A	0.202609	#N/A	-0.111936	#N/A		#N/A		#N/A		#N/A		#N/A		#N/A
[V].lVGMPAGAk.[C]	P00330	ADH1	-0.00481863	0.254572	-0.0414216	0.110528	-0.0362914	0.107506	0.306629	0.133724	0.163248	-0.0533848
[G].iDGGEGkEELFR.[S]	P00330	ADH1	-0.166723	0.297121	-0.171087	0.0392598	-0.0101523	-0.00860316	0.13428	0.114951	-0.000730282	0.0833067
[S].iSIVGSYVGNR.[A]	P00330	ADH1	0.106232	0.253924	-0.0467014	-0.164697	-0.030365	-0.0260568	0.116734	-0.00929661	-0.0383382	0.104365
[S].lAVQYAkAMGYR.[V]	P00330	ADH1	-0.134015	-0.323073	0.1434	0.128432	-0.0298598	-0.0392799	0.100244	0.128614	-0.0680749	0.146368
[K].iGDYAGIkW.[L]	P00330	ADH1	-0.0587011	0.819748	-0.178017	0.114578	-0.0917771	0.0745566	0.202595	0.225282	0.025915	0.181057
[G].lSTLPEIYEkMEkGQIVGR.[Y]	P00330	ADH1	0.234545	0.473251	-0.485623	-0.00847271	-0.0199086	-0.0583594	0.228356	0.148628	-0.278774	0.0955576
[L].aVQYAkAMGYR.[V]	P00330	ADH1	0.0168453	0.00874235	0.137712	0.0566931	-0.0130699	0.0326745	0.254912	0.129195	-0.171525	0.144066
[L].gIDGGEGkEELFR.[S]	P00330	ADH1	0.111869	0.183416	0.0401728	-0.039254	0.150567	0.115741	0.133757	0.213688	-0.158814	-0.0175062
[N].vSVSEAAIEASTR.[Y]	P00330	ADH1	0.229065	0.335138	0.0712238	-0.295039	-0.0400333	0.0390645	0.020772	-0.065601	-0.154148	0.144906
[R].vLGIDGGEGkEELFR.[S]	P00330	ADH1	0.533215	0.555106	-0.424175	0.0550603	0.103312	-0.025987	0.149629	0.215655	-0.162293	0.158526
[L].sTLPEIYEkMEkGQIVGR.[Y]	P00330	ADH1	0.180639	0.325999	-0.236415	-0.0326655	-0.0537966	0.0398826	0.239576	0.293047	-0.411308	-0.0550293
[P].lVGGHEGAGVVVGMGENVkGWk.[I]	P00330	ADH1	-0.277408	0.848641	-0.0485883	0.119715	0.0997676	0.0564941	0.400783	-0.00120069	-0.176467	-0.0520909
[HQ].vVkSISIVGSYVGNR.[A]	P00330	ADH1	0.170414	0.114429	0.0329177	-0.166513	0.218208	-0.0320648	0.16205	0.135756	-0.356876	0.188679
[G].vINVSVSEAAIEASTR.[Y]	P00330	ADH1	-0.0224596	0.261386	0.0965012	-0.30527	0.0599977	0.115622	0.212451	0.14125	-0.0874773	0.00260367
[A].iSGAAGGLGSLAVQYAkAmGYR.[V]	P00330	ADH1	0.386086	0.505389	-0.370281	-0.381452	0.03663	-0.0168534	0.26652	0.178987	-0.240553	0.0441758
[V].lkATDGGAHGVINVSVSEAAIEASTR.[Y]	P00330	ADH1	1.01697	#N/A	-0.317543	#N/A	-0.159842	#N/A	0.290009	#N/A	-0.314588	#N/A	>3 sigma	#N/A		#N/A		#N/A		#N/A		#N/A
[G].vVVGMGENVkGWk.[I]	P00330	ADH1	-0.00780953	0.147092	-0.175474	-0.0946822	-0.104947	-0.00725295	0.367312	0.00937369	-0.126757	-0.168012
[V].lGIDGGEGkEELFR.[S]	P00330	ADH1	0.181299	0.176117	-0.0605401	0.077468	0.105437	0.0140991	0.137294	0.182779	-0.0441269	0.199296
[K].vVGLSTLPEIYEkMEkGQIVGR.[Y]	P00330	ADH1	-0.226878	#N/A	0.290242	#N/A	0.122395	#N/A	0.248455	#N/A	0.0556748	#N/A		#N/A		#N/A		#N/A		#N/A		#N/A
[W].vAISGAAGGLGSLAVQYAkAMGYR.[V]	P00330	ADH1	0	#N/A	-0.686302	#N/A	-0.270571	#N/A	0.344961	#N/A	-0.161905	#N/A		#N/A		#N/A		#N/A		#N/A		#N/A
[D].iVGAVLkATDGGAHGVINVSVSEAAIEASTR.[Y]	P00330	ADH1	-0.611321	#N/A	0.0404259	#N/A	0.0864345	#N/A	0.316528	#N/A	-0.212376	#N/A		#N/A		#N/A		#N/A		#N/A		#N/A
[S].vSEAAIEASTR.[Y]	P00330	ADH1	0.135568	0.286855	-0.00875383	0.110983	0.00671562	0.0260284	0.231238	0.0557051	-0.0961779	0.118541
[S].iVGSYVGnR.[A]	P00330	ADH1	0.104662	0.151046	0.0410416	-0.131027	-0.0146709	-0.054816	0.0795247	0.0406263	-0.133024	0.08348
[A].vQYAkAMGYR.[V]	P00330	ADH1	0.239402	0.334097	0.0444094	-0.154827	0.0107467	-0.0625375	0.137557	0.0805196	-0.124343	0.0874324
[K].ccSDVFNQVVkS.[I]	P00330	ADH1	0	#N/A	0.356907	#N/A	-0.00395341	#N/A	0.845331	#N/A	-0.383118	#N/A		#N/A		#N/A		#N/A		#N/A		#N/A
[V].vGLSTLPEIYEkMEkGQIVGR.[Y]	P00330	ADH1	0.0844411	0	-0.206356	-0.364895	-0.211441	0.260574	0.26291	0.23053	-0.218964	-0.337653
[E].aAIEASTR.[Y]	P00330	ADH1	0.159108	0.0819008	-0.0569659	-0.0664402	0.0212744	-0.0327937	0.266323	0.0837915	0.0246108	0.0323442
[HQ].vVkSISIVGSYVGNRADTREALDFFAR.[G]	P00330	ADH1	0.438089	#N/A	0.0996393	#N/A	0.175548	#N/A	-0.273909	#N/A	-0.126652	#N/A		#N/A		#N/A		#N/A		#N/A		#N/A
[S].lAVQYAk.[A]	P00330	ADH1	0.242869	0.0253699	0.100094	-0.0320703	0.164144	0.0609961	0.169354	0.148222	-0.0865592	0.0883552
[R].gLVkSPIkVVG.[L]	P00330	ADH1	0.161343	#N/A	0.238226	#N/A	0.0204235	#N/A	0.21655	#N/A	-0.128868	#N/A		#N/A		#N/A		#N/A		#N/A		#N/A
[V].gLSTLPEIYEkMEkGQIVGR.[Y]	P00330	ADH1	0.0612463	#N/A	0.168211	#N/A	-0.186587	#N/A	0.0412375	#N/A	-0.241593	#N/A		#N/A		#N/A		#N/A		#N/A		#N/A
[K].ccSDVFNQ.[V]	P00330	ADH1	1.54879	#N/A	-0.315829	#N/A	-0.163144	#N/A	0.491584	#N/A	0.0345273	#N/A	>3 sigma	#N/A		#N/A		#N/A		#N/A		#N/A
[EC].lLINVk.[YT]	P00330	ADH1	-0.0190846	-1.01181	0.192454	0.327921	-0.0714342	0.165489	0.217747	0.328892	-0.0359287	0.02342		<-3 sigma
[A].lDFFAR.[G]	P00330	ADH1	0.122149	#N/A	-0.120312	#N/A	-0.458384	#N/A	0.0615106	#N/A	-0.109667	#N/A		#N/A		#N/A		#N/A		#N/A		#N/A
[D].iVGAVLk.[A]	P00330	ADH1	0.242726	0.380512	0.114665	-0.308228	0.00858788	0.143623	0.174916	0.189763	-0.0955854	0.0245798
[G].lVkSPIk.[V]	P00330	ADH1	-0.0893544	0.0433564	-0.219987	-0.019827	-0.184768	0.010488	0.34134	0.165274	-0.00195048	-0.137118
[R].iIGLDYHHPDFEQESkH.[F]	P32589	SSE1	0.326856	0.787437	0.110826	0.411919	0.0145773	0.503228	0.152734	0.0924842	-0.0386525	-0.113515
[G].iFkTDLPEGEEkPR.[I]	P32589	SSE1	-0.0421685	0.33121	-0.0287878	-0.086045	0.211001	0.0292091	0.173091	0.168816	-0.301303	0.000446841
[M].lAQDkLVAETEDR.[K]	P32589	SSE1	0.119513	0.301396	-0.0162549	-0.104802	0.133244	0.103072	0.0741706	-0.0423821	-0.24464	-0.131578
[K].lVELDDkkTGAEVR.[F]	P32589	SSE1	0.130532	0.305237	-0.099162	-0.0514322	0.103332	0.116529	0.213938	0.0445168	-0.224851	0.190969
[K].lNELIEkENEM.[L]	P32589	SSE1	0.090568	#N/A	0.0579691	#N/A	0.166266	#N/A	0.129167	#N/A	-0.195014	#N/A		#N/A		#N/A		#N/A		#N/A		#N/A
[G].iDIVVNEVSNR.[S]	P32589	SSE1	0.179365	0.516502	-0.0192359	-0.0693879	-0.0150655	-0.130321	0.0980565	-0.102356	-0.134297	0.0889394
[E].iTGVQLPEGQDSVPVk.[L]	P32589	SSE1	-0.116269	0.310944	-0.0589803	0.0983215	0.341567	-0.0740895	0.269294	0.383711	-0.0362212	0.0125905
[C].iAVPPWYTEEQR.[Y]	P32589	SSE1	0.0948314	0.265128	-0.109789	-0.0403717	0.183589	0.136638	0.244452	0.130739	-0.152833	-0.157602
[E].iTGVQLPEGQDSVPVkLk.[L]	P32589	SSE1	0.708125	0.52345	-0.133865	-0.0716102	0.220113	0.0405537	0.296677	0.00535902	-0.0461419	0.00104755
[E].iTGVQLPEGQDSVPVkLkLR.[C]	P32589	SSE1	0.0704015	1.14231	-0.273086	0.0939115	0.00219535	-0.0577614	0.191422	0.0617356	-0.418944	0.392012		>3 sigma
[H].fTSkLVELDDkkTGAEVR.[F]	P32589	SSE1	0.704971	0.493288	0.115916	-0.130347	0.0502652	0.0399892	0.205763	0.0495165	-0.232197	-0.0687555
[G].vSYGIFkTDLPEGEEkPR.[I]	P32589	SSE1	0.238963	0	0.099748	-0.529199	0.270218	-0.257987	0.0154869	-0.180766	-0.164914	0.131606
[Q].iANWEITGVQLPEGQDSVPVkLk.[L]	P32589	SSE1	0.848438	0.45112	-0.0603631	0.274692	0.119197	0.0941827	0.299586	0.637894	-0.348436	-1.16724										<-3 sigma
[K].lNELIEkENEMLAQDkLVAETEDR.[K]	P32589	SSE1	-1.3138	#N/A	-0.153747	#N/A	-0.0223737	#N/A	0.394841	#N/A	-0.284042	#N/A	<-3 sigma	#N/A		#N/A		#N/A		#N/A		#N/A
[K].lSAEEVDFVEIIGGTTR.[I]	P32589	SSE1	-0.0593461	0.960678	-0.0622235	0.325826	0.113112	-0.320172	0.0703514	-0.0632832	-0.477394	0.642767		>3 sigma
[A].lAQAkLSAEEVDFVEIIGGTTR.[I]	P32589	SSE1	0.190581	0.320977	-0.348554	0.0355689	0.00776699	-0.0847084	0.0375957	-0.347794	-0.096442	0.527871
[Q].iANWEITGVQLPEGQDSVPVkLkLR.[C]	P32589	SSE1	0	#N/A	1.80927	#N/A	0.60464	#N/A	0.196601	#N/A	-0.111718	#N/A		#N/A	>3 sigma	#N/A		#N/A		#N/A		#N/A
[Y].iAkYEELASLGNIIR.[G]	P32589	SSE1	-0.0320747	#N/A	0.258012	#N/A	0.101017	#N/A	0.102114	#N/A	-0.268671	#N/A		#N/A		#N/A		#N/A		#N/A		#N/A
[Q].iANWEITGVQLPEGQDSVPVk.[L]	P32589	SSE1	0.25454	#N/A	-0.277524	#N/A	0.473395	#N/A	0.13853	#N/A	-0.34115	#N/A		#N/A		#N/A		#N/A		#N/A		#N/A
[A].aMAEkLAAQR.[K]	P32589	SSE1	0.147397	0.340021	-0.138981	-0.143735	0.0918808	0.10488	0.168655	0.143603	-0.158794	-0.0320875
[R].fAGEkHVFSATQ.[L]	P32589	SSE1	0.138128	0.476985	0.270037	-0.290124	0.00864402	-0.0517421	0.125038	-0.0931652	-0.0415773	0.0360643
[Y].lAkEEEkkQAIR.[S]	P32589	SSE1	0.392345	0.33276	-0.0141266	-0.216258	0.090127	-0.0503714	0.249859	0.114091	-0.148655	0.154816
[L].vAETEDR.[K]	P32589	SSE1	0.0936507	0.175284	0.0502265	-0.0335524	0.143663	0.178676	0.21457	-0.150725	0.146126	-0.251216
[R].fAGEkHV.[F]	P32589	SSE1	-0.0469249	#N/A	-0.160972	#N/A	0.304992	#N/A	0.240036	#N/A	0.00235367	#N/A		#N/A		#N/A		#N/A		#N/A		#N/A
[K].lVELDDkkTGAE.[V]	P32589	SSE1	-0.157229	#N/A	-0.239719	#N/A	0.0333531	#N/A	0.590133	#N/A	-1.49896	#N/A		#N/A		#N/A		#N/A		#N/A	<-3 sigma	#N/A
[K].lVAETEDR.[K]	P32589	SSE1	0.0475452	#N/A	0.158946	#N/A	0.251058	#N/A	0.141943	#N/A	-0.132567	#N/A		#N/A		#N/A		#N/A		#N/A		#N/A
[P].fASDAEkTk.[L]	P32589	SSE1	-0.106271	0.190976	-0.204884	-0.00889962	0.0311123	0.0912285	0.748817	0.0534425	-0.0978652	0.220498
[R].fAGEkH.[V]	P32589	SSE1	0.152494	#N/A	-0.108882	#N/A	0.164034	#N/A	0.206143	#N/A	-0.242174	#N/A		#N/A		#N/A		#N/A		#N/A		#N/A
[H].fADEFkTkYk.[I]	P32589	SSE1	-0.00758379	#N/A	0.0190763	#N/A	-0.108706	#N/A	0.202704	#N/A	-0.0650888	#N/A		#N/A		#N/A		#N/A		#N/A		#N/A
[Q].lSREELEELVkPLLER.[V]	P32589	SSE1	1.24738	#N/A	-0.341046	#N/A	0.106236	#N/A	0.203307	#N/A	-0.378325	#N/A	>3 sigma	#N/A		#N/A		#N/A		#N/A		#N/A
[T].fGLDAkk.[L]	P32589	SSE1	0.174803	#N/A	-0.00564734	#N/A	0.186344	#N/A	0.188307	#N/A	-0.158587	#N/A		#N/A		#N/A		#N/A		#N/A		#N/A
[S].vVGFGPkNR.[Y]	P32589	SSE1	0.452932	0.0801554	0.101157	-0.196576	0.110597	0.00616945	0.168595	0.118973	-0.268767	0.0934319
[P].aAVFTETLkHD.[-]	P10664	RPL4A	0.136591	0.191695	-0.00505435	-0.146644	0.124936	0.277396	0.171947	-0.0147552	-0.193794	-0.102528
[R].iInSSEIQSAIRPAGQATQkR.[T]	P10664	RPL4A	0.0231158	0.376595	-0.0769328	-0.139511	0.132969	-0.0158485	0.172701	0.203057	-0.251975	0.0394561
[A].vFTETLkHD.[-]	P10664	RPL4A	0.166573	0.381185	-0.0210367	0.0901319	0.0740345	0.167036	0.154056	0.0157032	-0.146077	-0.0674278
[S].lNLLQLAPGAHLGR.[F]	P10664	RPL4A	0	0	0.089463	-0.0647076	-0.592567	0.400501	-0.342566	0.0654142	-1.8717	-1.12631									<-3 sigma	<-3 sigma	Yes
[A].aVFTETLkHD.[-]	P10664	RPL4A	0.324178	0.466465	-0.0231618	-0.0887492	-0.126692	0.421174	0.360757	-0.19518	0.612899	0.0478715
[A].fTkLDQVWGSETVASSk.[V]	P10664	RPL4A	0.0792831	0.424601	-0.0720734	-0.284892	0.0891737	-0.337277	0.19682	0.145072	-0.00540498	-0.0415734
[A].vSEkAGHQTSAESWGTGR.[A]	P10664	RPL4A	0.16605	0.250882	0.0458014	0.00749262	0.222858	0.0019218	0.275846	0.291276	-0.267178	-0.288908
[Y].aVSEkAGHQTSAESWGTGR.[A]	P10664	RPL4A	0.406835	0.228445	-0.0679327	0.0203929	0.299502	-0.0176517	0.228324	-0.0478203	-0.317056	-0.20399
[N].vkVNHNEkR.[Y]	P10664	RPL4A	0.230233	0.215673	-0.115125	-0.0793883	0.0428902	0.148047	0.243044	0.0890983	-0.2092	-0.101717
[H].iISTSDVTR.[I]	P10664	RPL4A	0.154354	0.185072	0.0528182	-0.0279212	0.176084	0.0649394	0.182234	0.0683459	-0.0906301	0.151904
[A].fTkLDQVWGSETVASSkVGYTLPSHIISTSDVTR.[I]	P10664	RPL4A	0	0	0.698986	0	-0.62487	0.948551	0.283843	-0.265452	-0.288179	0.135777
[A].vGAHSDLLkVLkSkk.[L]	P10664	RPL4A	0.651752	#N/A	-0.196482	#N/A	0.324094	#N/A	0.154879	#N/A	-0.0913959	#N/A		#N/A		#N/A		#N/A		#N/A		#N/A
[T].vFTSVNknkR.[Q]	P10664	RPL4A	0.167308	0.338824	-0.0826765	-0.209454	0.0512026	0.137225	0.216515	0.0908102	-0.121354	0.0536257
[R].iINSSEIQSA.[I]	P10664	RPL4A	0.22391	0.115891	-0.0236922	-0.0477289	0.0612287	-0.0123959	0.341276	0.0148037	-0.158296	-0.0461449
[K].vNHnEkR.[Y]	P10664	RPL4A	0.642333	#N/A	0.159779	#N/A	0.14225	#N/A	0.203659	#N/A	-0.142899	#N/A		#N/A		#N/A		#N/A		#N/A		#N/A
[A].yAVSEkAGHQTSAESWGTGR.[A]	P10664	RPL4A	0.486317	#N/A	-0.155563	#N/A	0.061675	#N/A	0.433243	#N/A	-0.284121	#N/A		#N/A		#N/A		#N/A		#N/A		#N/A
[R].iINSSEIQS.[A]	P10664	RPL4A	0.333769	#N/A	-0.10021	#N/A	0.151787	#N/A	0.0431921	#N/A	-0.0954817	#N/A		#N/A		#N/A		#N/A		#N/A		#N/A
[S].aIRPAGQATQkR.[T]	P10664	RPL4A	-0.0834614	0.3286	-0.0124718	-0.121555	0.22534	-0.205115	0.26314	-0.0384485	-0.175575	-0.297768
[M].fAPTkTWR.[K]	P10664	RPL4A	0.151007	0.0748346	-0.0922987	-0.0343482	0.141521	0.129277	0.145947	0.00257616	-0.131853	0.361543
[R].lNPYAkV.[F]	P10664	RPL4A	0	#N/A	-0.0831717	#N/A	0.28238	#N/A	0.106761	#N/A	0.828869	#N/A		#N/A		#N/A		#N/A		#N/A		#N/A
[N].vLPLGSVPEGTIVSNVEEkPGDR.[G]	P0CX46	RPL2B	0.353547	-0.00413069	-0.0553393	0.100207	0.0384601	0.151005	0.337751	-0.0846452	-0.23007	-0.204259
[F].iYAGkkASLnVGNVLPLGSVPEGTIVSNVEEkPGDR.[G]	P0CX46	RPL2B	0	0	1.43295	0	0.380924	1.04749	-0.227959	0.601071	-0.41418	-1.63457			>3 sigma			>3 sigma				<-3 sigma
[Y].vIIIGHNPDEnkTR.[V]	P0CX46	RPL2B	0.268455	0.265626	-0.0173037	-0.106035	0.0990117	0.0534739	0.20403	0.108421	-0.21314	0.00693321
[N].vGNVLPLGSVPEGTIVSNVEEkPGDR.[G]	P0CX46	RPL2B	-0.206186	0.0269336	-0.0792235	-0.00485703	0.12456	0.331868	0.0573288	-0.000380706	-0.247649	-0.110429
[R].lREEIFIANEGVHTGQF.[I]	P0CX46	RPL2B	-0.0331954	0.606255	0.0888204	-0.417804	0.18463	0.320395	0.243434	0.0107264	-0.128118	-0.010248
[P].lGSVPEGTIVSNVEEkPGDR.[G]	P0CX46	RPL2B	0.154827	0.255931	-0.0981126	-0.0190401	0.213386	0.0904462	0.126385	0.0434334	-0.0928887	-0.0398194
[S].lNVGnVLPLGSVPEGTIVSNVEEkPGDR.[G]	P0CX46	RPL2B	0.339272	0.911234	-0.0265068	-0.189538	0.10193	0.0612166	0.219721	0.0531768	-0.303577	-0.444663
[G].aGSIFTSHTR.[L]	P0CX46	RPL2B	0.0692146	0.270562	0.0261372	-0.167072	0.232641	0.0578861	0.212851	0.132765	-0.212683	-0.105758
[G].iVkQIVHDSGR.[G]	P0CX46	RPL2B	0.168292	0.287913	-0.0856382	0.0828509	0.0868886	0.0197062	0.00234418	-0.0605729	-0.255831	-0.00271162
[T].iVSNVEEkPGDR.[G]	P0CX46	RPL2B	-0.0563426	0.192317	-0.0541391	-0.0502565	0.02927	0.0294325	0.159158	0.127862	-0.0881649	-0.0671653
[K].vVFRDPYk.[Y]	P0CX46	RPL2B	0.116946	0.164444	-0.0309477	-0.0245276	-0.0680687	0.0359862	0.281406	-0.21167	-0.0428317	-0.0846395
[K].vVFRDPYkYR.[L]	P0CX46	RPL2B	0.182157	0.13099	-0.209559	-0.122071	0.138505	0.127482	0.245084	0.0767078	-0.0739999	0.0108221
[S].iFTSHTR.[L]	P0CX46	RPL2B	0.182635	#N/A	0.102052	#N/A	0.0594149	#N/A	0.353939	#N/A	-0.00490927	#N/A		#N/A		#N/A		#N/A		#N/A		#N/A
[Q].iVHDSGR.[G]	P0CX46	RPL2B	0.325061	0.0896147	0.0867687	-0.0897263	0.0411434	-0.0357709	0.0933598	-0.0655979	-0.100223	0.0768816
[K].vISSDAR.[G]	P0CX46	RPL2B	0.245586	0.22524	-0.111498	-0.0699571	0.235075	0.115775	0.305785	0.0818743	0.095567	0.117972
[G].vIAGGGR.[V]	P0CX46	RPL2B	-0.129742	0.317708	0.100996	-0.0583928	0.32485	0.14305	0.0848906	-0.145195	0.0491706	0.0858809
[T].lDYAER.[H]	P0CX46	RPL2B	-0.240415	0.126645	0.010346	-0.115451	0.0175181	0.026122	0.26493	-0.0831279	-0.00988597	0.115365
[T].lLPGLQDEVMNIkPVQkQTR.[A]	P25443	RPS2	0.282312	0.0586941	0.123782	-0.901497	0.0607989	0.198397	0.494987	0.276194	-0.169938	0.1676				<-3 sigma
[N].LWAEQPLPVSPLDIYSDEASAQkkR.[F]	P25443	RPS2	0.367012	0.0663203	0.0577625	-0.278089	0.140968	-0.0688848	0.233331	-0.0131191	-0.181058	-0.0327158
[P].vSPLDIYSDEASAQkkR.[F]	P25443	RPS2	0.423301	0.409191	-0.0744312	-0.0173592	0.105333	0.247348	0.187598	-0.0415824	-0.181918	0.0862513
[G].lQDEVMNIkPVQkQTR.[A]	P25443	RPS2	0.127748	0.824195	-0.0352493	0.122219	0.0185909	0.274562	0.283135	0.0761074	-0.142299	0.249368
[K].aVVVVGDSnGHVG.[L]	P25443	RPS2	0.144859	#N/A	-0.089632	#N/A	0.125882	#N/A	0.303444	#N/A	-0.185396	#N/A		#N/A		#N/A		#N/A		#N/A		#N/A
[G].iVASPAVkk.[L]	P25443	RPS2	0.0517511	0.274513	-0.200498	-0.0878027	0.154907	0.0706341	0.240341	0.21709	0.0740868	0.188631
[P].lDIYSDEASAQkkR.[F]	P25443	RPS2	0.124096	0.194109	-0.115289	0.063797	0.152771	-0.0562508	0.15611	0.127511	-0.156099	-0.114506
[Q].lAGVEDVYTQSnGkTR.[T]	P25443	RPS2	0.307384	0.319625	-0.026475	-0.0227412	0.101061	0.112652	0.197897	0.0384989	-0.17965	0.161407
[W].aEQPLPVSPLDIYSDEASAQkkR.[F]	P25443	RPS2	0.310846	#N/A	-0.40645	#N/A	-0.317088	#N/A	0.262507	#N/A	-0.0753271	#N/A		#N/A		#N/A		#N/A		#N/A		#N/A
[K].lLQLAGVEDVYTqSNGkTR.[T]	P25443	RPS2	0.211857	0.612032	0.174949	0.150849	0.146131	0.0856354	0.252662	-0.00454439	-0.323006	0.0544975
[L].lQLAGVEDVYTQSnGkTR.[T]	P25443	RPS2	0.49247	0.351567	-0.133096	-0.440656	0.0304818	0.0611178	0.0808216	0.116543	-0.179983	-0.425358
[D].iYSDEASAQkkR.[F]	P25443	RPS2	0.156211	0.187958	-0.121322	-0.199272	-0.112959	-0.0707481	0.115167	0.435643	-0.200725	-0.404683
[Q].iIDTLLPGLQDEVMNIkPVQkQTR.[A]	P25443	RPS2	0.0723693	#N/A	-0.6735	#N/A	0.0867322	#N/A	0.243849	#N/A	-0.280856	#N/A		#N/A		#N/A		#N/A		#N/A		#N/A
[G].iVASPAVkkLLQLAGVEDVYTQSnGkTR.[T]	P25443	RPS2	0	#N/A	-0.255782	#N/A	0.0987799	#N/A	0.335633	#N/A	-0.0734587	#N/A		#N/A		#N/A		#N/A		#N/A		#N/A
[F].lTPNLWAEQPLPVSPLDIYSDEASAQkkR.[F]	P25443	RPS2	0.161021	0	-0.629901	-0.43813	-0.280524	0.038077	0.186176	0.488115	-0.184756	-0.429355
[R].LVkAGkITTIEE.[I]	P25443	RPS2	#N/A	0.382157	#N/A	-0.145523	#N/A	0.081955	#N/A	0.0508263	#N/A	0.234494	#N/A		#N/A		#N/A		#N/A		#N/A
[L].aGVEDVYTQSnGkTR.[T]	P25443	RPS2	0.276672	0.343897	0.0746271	-0.0705796	0.121515	0.0866803	0.291505	0.146655	-0.151352	-0.0147997
[R].LVkAGkITTIEEIF.[L]	P25443	RPS2	0.613429	0.134538	0.0575077	0.053097	0.245267	-0.105305	0.220669	0.277105	-0.148005	-0.0850336
[K].lSVIPIRR.[G]	P25443	RPS2	0.0451818	0.227974	-0.0631962	-0.0939241	0.169694	0.430393	0.0526162	0.244007	-0.046053	0.187407
[K].lSVIPIR.[R]	P25443	RPS2	0.402055	0.138673	-0.111421	0.194503	0.0334107	0.0181912	0.0538081	0.102686	0.0858066	0.273835
[K].iTTIEEIF.[L]	P25443	RPS2	0	#N/A	-0.0186925	#N/A	-0.565946	#N/A	1.12185	#N/A	1.65125	#N/A		#N/A		#N/A		#N/A	>3 sigma	#N/A	>3 sigma	#N/A	Yes
[R].lVkAGkITT.[I]	P25443	RPS2	-0.210433	#N/A	-0.0337212	#N/A	0.16092	#N/A	0.135653	#N/A	-0.175513	#N/A		#N/A		#N/A		#N/A		#N/A		#N/A
[S].lATkTTGkcGSVTVR.[L]	P25443	RPS2	0.160787	#N/A	0.102976	#N/A	0.105742	#N/A	0.1693	#N/A	-0.5406	#N/A		#N/A		#N/A		#N/A		#N/A		#N/A
[N].ikPVQkQTR.[A]	P25443	RPS2	0.151472	#N/A	-0.21381	#N/A	0.182209	#N/A	0.186367	#N/A	0.0484094	#N/A		#N/A		#N/A		#N/A		#N/A		#N/A
[Y].iFGGHVSQYmEELADDDEER.[F]	P26321	RPL5	0.0382055	0.421479	-0.0877261	-0.137563	0.0939501	-0.0947183	0.115291	0.0190622	-0.169099	-0.158193
[E].lTEAVEDGPRPFk.[V]	P26321	RPL5	0.230361	0.197162	-0.0718381	-0.113261	0.330144	-0.228762	0.341088	0.0662816	-0.434318	-0.0939998
[Q].yMEELADDDEER.[F]	P26321	RPL5	0.260131	0.303888	0.277296	0.148748	0.0511764	0.0824957	0.272297	0.333326	-0.266065	0.579389
[K].vFLDIGLQR.[T]	P26321	RPL5	0.133306	0.138221	-0.0202259	-0.0624919	0.23891	0.202608	0.260029	0.31412	-0.0728187	0.219452
[T].iTGDVVLAAAYSHELPR.[Y]	P26321	RPL5	-0.515275	1.69838	0.109025	0.517812	0.081461	-0.0160191	0.13479	0.109163	-0.132483	-0.219889		>3 sigma
[H].vSQYMEELADDDEER.[F]	P26321	RPL5	0.313739	0.349806	-0.135126	0.140234	0.0196096	0.134649	0.00795633	0.146233	-0.662161	-0.115055
[R].vFGALkGASDGGLYVPHSENR.[F]	P26321	RPL5	-0.0341596	#N/A	0.0983471	#N/A	0.238404	#N/A	0.465148	#N/A	-0.252696	#N/A		#N/A		#N/A		#N/A		#N/A		#N/A
[K].lGLDETYkGVEEVEGEYE.[L]	P26321	RPL5	0.385723	#N/A	-0.141521	#N/A	0.154345	#N/A	0.192427	#N/A	-0.178675	#N/A		#N/A		#N/A		#N/A		#N/A		#N/A
[T].lQkLGLDETYkGVEEVEGEYELTEAVEDGPRPFk.[V]	P26321	RPL5	0	#N/A	-0.0616729	#N/A	0.00922964	#N/A	0.126958	#N/A	-0.569695	#N/A		#N/A		#N/A		#N/A		#N/A		#N/A
[K].lGLDETYkGVEEVEGEYELTEAVEDGPRPFk.[V]	P26321	RPL5	0	#N/A	-0.43334	#N/A	-0.0371376	#N/A	0.52891	#N/A	-0.165278	#N/A		#N/A		#N/A		#N/A		#N/A		#N/A
[L].aAAYSHELPR.[Y]	P26321	RPL5	0.476543	0.44456	-0.0184747	0.15691	0.197326	-0.0512932	0.188611	-0.301969	-0.191182	0.13851
[A].aAYSHELPR.[Y]	P26321	RPL5	0.251572	0.539798	-0.0306003	-0.00601352	0.115173	-0.0388485	-0.20515	-0.18284	0.115748	-0.190237
[M].aFQkDAkSSAYSSR.[F]	P26321	RPL5	0.298105	0.35853	-0.173977	-0.0853336	0.304597	0.119561	0.24563	0.141101	0.00627594	0.0556026
[G].aSDGGLYVPHSENR.[F]	P26321	RPL5	0.323966	0.382006	-0.12683	-0.0926881	0.204861	0.0684995	0.262085	0.032555	-0.222628	0.100232
[K].lGLDETYkGVEEVEGEYELTEAVEDGPRP.[F]	P26321	RPL5	0.418146	0.796281	0.0291043	-0.637308	0.0700576	0.135795	0.2319	0.0668428	-0.33239	-0.339801
[G].yLADDIDADSLEDIYTSAHEAIR.[A]	P26321	RPL5	0.00430747	#N/A	-0.733575	#N/A	0.676533	#N/A	0.131909	#N/A	-0.219732	#N/A		#N/A		#N/A		#N/A		#N/A		#N/A
[Y].mEELADDDEER.[F]	P26321	RPL5	0.108463	-0.231611	0.0355012	-0.214119	-0.0533794	0.63156	0.281989	0.548657	-0.428974	-0.741007
[Y].lADDIDADSLEDIYTSAHEAIR.[A]	P26321	RPL5	0.275215	0.0491366	0.0455629	-0.819257	0.00881494	0.447815	0.172316	-0.374353	-0.203491	0.0180206
[A].lkGASDGGLYVPHSEnR.[F]	P26321	RPL5	0.218595	0.312489	-0.0446869	-0.0143418	0.10525	0.0117022	0.185911	0.140958	-0.185463	0.144673
[K].fTkEQYAAESkkYR.[Q]	P26321	RPL5	0.234511	0.32428	-0.184136	-0.200108	0.253836	0.0670962	0.340804	0.161238	-0.206724	0.0740027
[G].aLkGASDGGLYVPHSENR.[F]	P26321	RPL5	0.478828	#N/A	-0.0191539	#N/A	0.156146	#N/A	0.203485	#N/A	-0.175849	#N/A		#N/A		#N/A		#N/A		#N/A		#N/A
[V].fLDIGLQR.[T]	P26321	RPL5	0.294896	0.272489	-0.0397687	-0.0694768	0.237071	-0.193072	0.223875	0.163447	-0.24512	0.142166
[R].vAAkIAALAGQQ.[-]	P26321	RPL5	0	#N/A	1.67717	#N/A	-0.0398273	#N/A	-0.261213	#N/A	-0.0829679	#N/A		#N/A	>3 sigma	#N/A		#N/A		#N/A		#N/A
[F].lDIGLQR.[T]	P26321	RPL5	0.200773	0.0239565	0.0235979	-0.147168	0.216111	0.105263	0.0633107	0.253303	-0.0140787	-0.0144287
[K].fTkEQYAAESkk.[Y]	P26321	RPL5	0.103322	#N/A	-0.343077	#N/A	0.178051	#N/A	-0.0610953	#N/A	-0.549799	#N/A		#N/A		#N/A		#N/A		#N/A		#N/A
[A].fkPTEkk.[F]	P26321	RPL5	0.130545	#N/A	-0.0843245	#N/A	0.177115	#N/A	0.279417	#N/A	-0.203466	#N/A		#N/A		#N/A		#N/A		#N/A		#N/A
[R].lVTQHk.[A]	P26321	RPL5	0.341319	0.157737	-0.156315	-0.095956	0.0145436	0.0708364	0.619917	0.168145	0.102651	0.140291
[A].aYSHELPR.[Y]	P26321	RPL5	0.425078	0.202796	-0.0720598	0.0787268	0.0673719	0.368821	0.262058	0.0993875	0.0843946	-0.0950933
[Y].aAESkkYR.[Q]	P26321	RPL5	-0.00196471	0.19078	-0.0779808	-0.0637548	0.0359735	-0.0919282	0.589744	0.0992632	-0.10881	0.140943
[G].lSkEDDVRDFVIR.[R]	P0CX38	RPS6B	0.121269	0.393288	0.0295108	-0.0175478	-0.134255	0.0199996	0.0292741	0.0708873	-0.116902	0.133714
[K].iSGGnDkQGFPmkQGVLLPTR.[I]	P0CX38	RPS6B	0.546877	0.346224	-0.0458322	-0.077661	0.0838569	0.0976628	0.165667	0.103426	-0.135408	0.0357027
[N].iSYPVnGSQkTFEIDDEHR.[I]	P0CX38	RPS6B	0.306739	0.258301	-0.104376	-0.119102	0.124563	0.0715925	0.157555	0.0604551	-0.151575	0.0470316
[R].IGQEVDGEAVGDEFkGY.[V]	P0CX38	RPS6B	0.310579	0.212052	0.0179894	0.010156	0.210079	0.00628728	0.319503	0.0791648	-0.217248	-0.0155878
[K].iSGGNDkQGFPMkQG.[V]	P0CX38	RPS6B	0.441973	#N/A	-0.0823585	#N/A	0.0724659	#N/A	0.408255	#N/A	-0.498117	#N/A		#N/A		#N/A		#N/A		#N/A		#N/A
[A].lVIVkkGEQELEGLTDTTVPkR.[L]	P0CX38	RPS6B	0.479819	0.551165	-0.0556874	-0.0692322	0.112221	-0.0696408	0.210866	0.0884861	-0.179489	-0.065141
[R].iGQEVDGEAVGDEFkGYVFk.[I]	P0CX38	RPS6B	0.347123	0.339131	-0.088784	-0.0411157	0.0958809	0.0927713	0.218761	0.0531477	-0.117426	0.00032272
[F].fGLSkEDDVRDFVIR.[R]	P0CX38	RPS6B	-0.373819	#N/A	-0.295854	#N/A	-0.0785634	#N/A	0.139099	#N/A	-0.181732	#N/A		#N/A		#N/A		#N/A		#N/A		#N/A
[K].lNISYPVnGSQkTFE.[I]	P0CX38	RPS6B	-0.191492	#N/A	0.136067	#N/A	0.124318	#N/A	0.354738	#N/A	-0.115065	#N/A		#N/A		#N/A		#N/A		#N/A		#N/A
[K].lNISYPVnGSQkT.[F]	P0CX38	RPS6B	0.324731	-0.0598856	-0.0719715	-0.326886	0.146255	0.126808	0.26106	0.17986	-0.288021	-1.55769										<-3 sigma
[K].lNISYPVnGSqkTFEIDDEHR.[I]	P0CX38	RPS6B	0.393031	0.0625879	-0.0919281	-0.108831	0.183204	-0.038586	0.198511	0.0652887	-0.263344	0.0462039
[R].iGQEVDGEAVGDEFkGYV.[F]	P0CX38	RPS6B	0.524423	#N/A	0.0556959	#N/A	-0.0391365	#N/A	0.126471	#N/A	-0.100966	#N/A		#N/A		#N/A		#N/A		#N/A		#N/A
[E].vDGEAVGDEFkGYVFk.[I]	P0CX38	RPS6B	0.158209	#N/A	-0.329488	#N/A	-0.281417	#N/A	0.101569	#N/A	-0.0943538	#N/A		#N/A		#N/A		#N/A		#N/A		#N/A
[P].vnGSQkTFEIDDEHR.[I]	P0CX38	RPS6B	0.307586	0.290983	0.282618	-0.0820874	0.0819967	-0.0596092	0.0204692	-0.0924495	-0.32494	0.11811
[G].lTDTTVPkR.[L]	P0CX38	RPS6B	0.203726	0.278821	0.0291034	-0.0344046	0.168655	0.117097	0.229382	-0.0879678	-0.173966	0.0373272
[T].fEIDDEHR.[I]	P0CX38	RPS6B	0.226707	0.358675	-0.0295181	0.0333922	0.0830628	0.150385	0.156073	0.119026	-0.0494273	0.285117
[G].lSkEDDVR.[D]	P0CX38	RPS6B	0.122888	0.178121	0.0575355	-0.180344	-0.201874	-0.0110244	0.055029	0.056287	-0.192745	0.152975
[Q].gFPMkQGVLLPTR.[I]	P0CX38	RPS6B	0.543828	0.317222	-0.155484	-0.203561	0.0460841	-0.108944	0.131621	0.00608166	-0.29382	-0.160492
[E].vTkGEkTYTkAPk.[I]	P0CX38	RPS6B	0.538493	0.649043	-0.286547	-0.149169	0.354498	0.115729	0.329708	-0.210691	-0.227057	-0.505595
[R].IGQEVDGEAVGDEFkG.[Y]	P0CX38	RPS6B	0.169145	0.503095	-0.0114837	-0.125477	0.123275	-0.0579889	0.14083	-0.00541156	0.00143347	-0.190298
[P].mkQGVLLPTR.[I]	P0CX38	RPS6B	0.436033	#N/A	-0.171703	#N/A	0.0620918	#N/A	0.190677	#N/A	-0.380127	#N/A		#N/A		#N/A		#N/A		#N/A		#N/A
[R].vFFDkR.[I]	P0CX38	RPS6B	1.57634	#N/A	-0.0950034	#N/A	-0.157607	#N/A	0.0410672	#N/A	-0.00373896	#N/A	>3 sigma	#N/A		#N/A		#N/A		#N/A		#N/A
[L].aLVIVkkGEQELEGLTDTTVPkR.[L]	P0CX38	RPS6B	-0.217153	#N/A	0.01592	#N/A	-0.640288	#N/A	-0.0897848	#N/A	0.190876	#N/A		#N/A		#N/A		#N/A		#N/A		#N/A
[Q].gVLLPTR.[I]	P0CX38	RPS6B	0.323208	#N/A	-0.08253	#N/A	0.0104692	#N/A	0.136576	#N/A	0.218805	#N/A		#N/A		#N/A		#N/A		#N/A		#N/A
[K].lNISYP.[V]	P0CX38	RPS6B	0.320328	0	1.54769	0.644356	-0.249469	0.790866	2.41012	0	1.53801	0			>3 sigma				>3 sigma		>3 sigma
[E].fDATFVESNTR.[K]	P39015	STM1	0.147536	-0.0769461	-0.186823	-0.108147	0.185915	0.0401572	0.111528	0.117975	-0.169023	-0.0233233
[Q].lSLQDYLNQQANNQFNkVPEAkkVELDAER.[I]	P39015	STM1	0	1.79285	0.257008	-0.348997	0.0749	0.244733	-0.11181	-0.00553467	-0.307862	-0.278723		>3 sigma
[Q].lkTkEYLEFDATFVESNTR.[K]	P39015	STM1	0.306548	#N/A	-0.0271541	#N/A	0.099442	#N/A	0.179859	#N/A	-0.127627	#N/A		#N/A		#N/A		#N/A		#N/A		#N/A
[D].vTDSATTkkSnTR.[R]	P39015	STM1	0.132393	#N/A	-0.0611312	#N/A	-0.0194031	#N/A	0.139822	#N/A	-0.230988	#N/A		#N/A		#N/A		#N/A		#N/A		#N/A
[N].aTNSANTVQkNR.[N]	P39015	STM1	0.0447105	0.134259	0.0209386	-0.0588568	0.186407	0.0383104	0.103966	0.0112466	-0.161211	-0.197465
[N].fGDRnnNSR.[N]	P39015	STM1	0.120098	0.726355	0.191791	0.509043	0.322541	0.631418	0.114356	0.456906	-0.435822	1.05503										>3 sigma
[S].lQDYLNQQANNQFnkVPEAkkVELDAER.[I]	P39015	STM1	0	0.419153	-0.105632	-0.617204	0.493763	-0.956167	-0.190112	-0.672981	-0.391323	-0.676756						<-3 sigma
[T].fVESnTR.[K]	P39015	STM1	0.0225951	0.110742	-0.10936	-0.0445431	0.21912	0.182533	0.329311	-0.000157062	-0.0233352	0.00356768
[K].vNQGWGDDkkE.[L]	P39015	STM1	0.0167023	0.0630941	-0.0863217	-0.0145076	0.146385	0.148531	0.193581	0.077026	-0.0627973	-0.196981
[K].vELDAER.[I]	P39015	STM1	0.00170077	0.304946	-0.0432897	0.0236621	0.266009	0.143073	0.271257	-0.191808	0.156339	-0.206631
[Q].fNkVPEAkkVELDAER.[I]	P39015	STM1	0.131977	0.338484	-0.162865	-0.138105	0.30312	0.0929595	0.243049	0.148776	-0.325737	-0.0408762
[Q].vLSAAATFPIAQPATDVEAR.[A]	P40212	RPL13B	0.501261	-0.107406	-0.0298372	0.0797909	0.0376576	-0.254599	0.152228	-0.0212611	-0.273392	-0.0155008
[M].aISkNLPILkNHFR.[K]	P40212	RPL13B	-0.0364714	0.216876	-0.0893991	-0.161953	0.195975	0.0958675	0.195983	-0.00106979	-0.129436	-0.0334792
[P].lDLLRPVVR.[A]	P40212	RPL13B	0.160879	-0.0698051	0.335492	-0.046349	0.147211	0.173461	0.136419	0.0673603	-0.151269	0.291373
[K].iAPRPLDLLRPVVR.[A]	P40212	RPL13B	0.311675	-0.0976765	0.0848551	-0.734229	0.000903088	0.580297	0.0793422	0.733643	-0.204009	0
[S].aAATFPIAQPATDVEAR.[A]	P40212	RPL13B	0.310163	0.341665	-0.0584602	0.00539401	0.194171	0.128769	0.150461	-0.0781658	-0.162834	-0.12946
[A].aATFPIAQPATDVEAR.[A]	P40212	RPL13B	0.111375	0.323599	0.158988	0.0426196	0.280302	0.0926044	0.234996	0.131275	-0.136141	0.1467
[R].lkEYQSkIIVFPR.[DN]	P40212	RPL13B	0.246772	0.662099	0.0584892	-0.0394039	0.360559	0.170556	0.242168	0.167812	-0.184538	0.134901
[T].iGIAVDHRR.[Q]	P40212	RPL13B	1.10251	#N/A	0.146882	#N/A	0.206998	#N/A	0.0168515	#N/A	-0.213971	#N/A	>3 sigma	#N/A		#N/A		#N/A		#N/A		#N/A
[R].aVQDnGESAFR.[T]	P40212	RPL13B	0.0843181	0.184382	-0.0664543	-0.153014	0.12205	0.0841808	-0.0226319	0.00826637	-0.177489	0.206002
[K].vHFDQAGkkVSR.[R]	P40212	RPL13B	0.366243	0.257847	-0.0876574	-0.146168	0.29178	0.0443606	0.118879	0.089047	-0.267934	0.108334
[K].vHFDQAGkk.[V]	P40212	RPL13B	0.245925	0.275273	-0.0532	-0.0416998	0.254446	0.259981	0.180262	-0.133418	0.08374	0.207965
[A].vQDnGESAFR.[T]	P40212	RPL13B	0.110357	0.220786	0.00318557	0.0687669	0.251178	0.216641	0.1567	-0.0918798	-0.318564	-0.0685026
[R].aVQDnGESAFRT.[L]	P40212	RPL13B	0.236353	0.164162	0.0663051	-0.251538	0.0197529	0.0123587	0.199076	0.172142	-0.452501	-0.0243613
[P].iAQPATDVEAR.[A]	P40212	RPL13B	0.0489222	0.215195	0.0314288	0.0145768	0.168418	0.0909865	0.0962484	-0.0224135	-0.171067	-0.109242
[T].iGIAVDHR.[R]	P40212	RPL13B	0.375751	0.216587	-0.0800763	-0.114159	0.12407	0.069178	0.195693	0.0776751	-0.0390899	0.171264
[E].yQSkIIVFPR.[DN]	P40212	RPL13B	-0.0279257	0.66665	-0.170122	0.0422806	0.0921401	0.254662	0.33085	0.320974	-0.0387345	0.00488018
[E].iFDANVQR.[L]	P40212	RPL13B	0.0798416	0.362971	-0.022902	0.114599	0.209992	0.183981	0.199236	0.198886	-0.108482	-0.107382
[M].aISkNLPILk.[N]	P40212	RPL13B	0.477322	0.0323619	-0.102244	0.252082	0.402258	0.169335	0.41529	-0.743375	-0.108037	-0.21386
[G].lTAAYAR.[T]	P40212	RPL13B	0.714438	0.215251	-0.0216878	0.10429	0.108243	0.000314694	0.0822592	0.0431642	-0.13161	0.070936
[H].fDQAGkkVSR.[R]	P40212	RPL13B	0.502804	0.183282	-0.14984	-0.0210522	0.382099	0.248189	0.1493	0.131082	-0.585371	0.123534
[H].fDQAGkk.[V]	P40212	RPL13B	0.0319182	#N/A	-0.0956901	#N/A	-0.291093	#N/A	0.691551	#N/A	0.168351	#N/A		#N/A		#N/A		#N/A		#N/A		#N/A
[EK].iIVFPR.[SDN]	P40212	RPL13B	-0.221742	0.524758	-0.223861	0.0162034	0.00235338	-0.0628613	-0.079299	0.152431	-0.0059095	0.0662352
[D].lASGkITDFIkFDAGk.[L]	P0CX35	RPS4A	-0.0919178	1.04592	-0.0236459	0.0931311	0.216342	0.116614	0.281171	0.244437	-0.224237	0.037578		>3 sigma
[R].LNnVFVIGEQGkPYISLPkGkGIkLS.[I]	P0CX35	RPS4A	1.08648	#N/A	0.18906	#N/A	-0.112693	#N/A	0.227414	#N/A	-0.253351	#N/A	>3 sigma	#N/A		#N/A		#N/A		#N/A		#N/A
[H].ikDSLDNTFVTR.[L]	P0CX35	RPS4A	0.0626286	0.251882	-0.0654107	-0.0427268	0.00416915	0.146637	0.186877	0.166011	-0.138295	0.236639
[R].lnNVFVIGEQGkPYISLPkGkG.[I]	P0CX35	RPS4A	0.310701	0.510875	-0.102247	-0.249778	0.0298609	-0.0211586	0.246297	0.209682	-0.214968	-0.116271
[D].lASGkITDFIk.[F]	P0CX35	RPS4A	-0.0566254	0.381132	-0.116569	0.0238087	0.217578	0.101974	0.162775	0.241906	-0.190737	0.167858
[D].lVHIkDSLDNTFVTR.[L]	P0CX35	RPS4A	0.196326	0.203456	0.0551133	-0.168041	-0.0438999	-0.0236535	0.124923	0.1217	-0.193156	0.0369404
[R].ITDEEASYk.[L]	P0CX35	RPS4A	-0.133888	0.232659	0.00420693	-0.10646	0.183872	0.00344493	0.140791	0.0417966	-0.0165889	0.151747
[K].iTDFIkFDAGkL.[V]	P0CX35	RPS4A	0.385513	#N/A	-0.0410985	#N/A	0.0953369	#N/A	-0.0521976	#N/A	-0.217936	#N/A		#N/A		#N/A		#N/A		#N/A		#N/A
[G].fMDVITLDATNENFR.[L]	P0CX35	RPS4A	0.54093	0	-0.0115129	-0.273659	0.344712	0.861402	0.273389	-1.48267	0.114167	0								<-3 sigma
[R].iGTIVHkER.[H]	P0CX35	RPS4A	-0.206902	0.254961	-0.143204	-0.221449	0.273346	0.237376	0.207241	0.00232991	-0.0477094	0.0747186
[Q].lGkkGVPYVVTHDGR.[T]	P0CX35	RPS4A	0.216365	0.476705	0.0409928	-0.277642	0.0791635	0.0824599	0.330887	0.201077	-0.122355	0.196208
[R].lVYDVkGRF.[A]	P0CX35	RPS4A	0.732422	#N/A	-0.189308	#N/A	-0.139368	#N/A	0.0632874	#N/A	-0.0747331	#N/A		#N/A		#N/A		#N/A		#N/A		#N/A
[R].lAAPHHWL.[L]	P0CX35	RPS4A	0.27175	1.15138	0.203672	0	0.175731	0.126117	0.334811	0	0.0717844	0		>3 sigma
[K].lSIAEER.[D]	P0CX35	RPS4A	-0.0862835	0.379652	-0.183022	-0.0861145	0.061132	0.0283175	0.162511	0.053375	-0.211209	0.0330444
[Y].vVTHDGR.[T]	P0CX35	RPS4A	-0.158632	#N/A	0.0151469	#N/A	0.279686	#N/A	0.278809	#N/A	0.00500949	#N/A		#N/A		#N/A		#N/A		#N/A		#N/A
[S].iAEERDR.[R]	P0CX35	RPS4A	0.504923	#N/A	-0.101032	#N/A	0.284751	#N/A	0.067969	#N/A	0.0918691	#N/A		#N/A		#N/A		#N/A		#N/A		#N/A
[H].vkVDGkVR.[T]	P0CX35	RPS4A	-0.153539	0.297297	-0.139026	-0.197689	0.0987391	0.0985047	0.272742	0.191777	0.0764126	0.265361
[T].iVHkER.[H]	P0CX35	RPS4A	-0.237041	0.198364	-0.058655	-0.11665	0.146927	-0.0330917	0.250468	0.136204	-0.0264388	0.304333
[K].iGIVEISPkGGR.[R]	P07280	RPS19A	0.0674209	0.446594	-0.339786	-0.214908	-0.0390379	-0.0259754	0.147913	0.074492	-0.0218101	0.111949
[V].lQALEkIGIVEISPkGGR.[R]	P07280	RPS19A	0.877328	0	-0.271654	-0.0249549	0.123065	-0.0528663	0.20531	0.311232	-0.248707	-0.0899159
[G].iVEISPkGGR.[R]	P07280	RPS19A	0.285089	0.40879	-0.247232	-0.00601286	0.00752878	0.118202	0.07997	0.0758734	-0.0593683	0.0403252
[R].iAAQTLEEDE.[-]	P07280	RPS19A	0.0299105	0.140302	-0.0270644	-0.192203	0.125617	0.0602779	0.291287	0.100497	-0.0949263	0.127639
[Y].vDIVkTSSGnEMPPQDAEGWFYkR.[A]	P07280	RPS19A	0.462195	0.812223	-0.0380504	0.042252	0.0931112	0.0623352	0.187789	0.182702	-0.136911	-0.0761962
[A].lEkIGIVEISPkGGR.[R]	P07280	RPS19A	0.394219	0.793937	0.0437925	-0.221411	-0.153091	-0.0711742	0.116535	0.205858	-0.221085	0.121682
[H].iDASGSInR.[K]	P07280	RPS19A	0.110331	0.417687	-0.0152769	-0.0702086	0.232318	0.058371	0.20285	0.132552	-0.127941	0.0908583
[G].vRPYkHIDASGSINR.[K]	P07280	RPS19A	0.431467	#N/A	-0.00241209	#N/A	0.160715	#N/A	0.222895	#N/A	-0.420778	#N/A		#N/A		#N/A		#N/A		#N/A		#N/A
[K].vLQALEkIG.[I]	P07280	RPS19A	0.457296	#N/A	-0.044351	#N/A	0.0553571	#N/A	0.153186	#N/A	-0.00255579	#N/A		#N/A		#N/A		#N/A		#N/A		#N/A
[G].iVEISPkGGRR.[I]	P07280	RPS19A	0.320587	#N/A	0.0882765	#N/A	0.111532	#N/A	0.207294	#N/A	-0.144671	#N/A		#N/A		#N/A		#N/A		#N/A		#N/A
[D].iVkTSSGNEMPPQDAEGWFYkR.[A]	P07280	RPS19A	-0.379347	#N/A	-0.28367	#N/A	0.277415	#N/A	0.219281	#N/A	-0.50343	#N/A		#N/A		#N/A		#N/A		#N/A		#N/A
[R].iSEnGQRD.[L]	P07280	RPS19A	-0.0239316	0.192506	-0.0569506	0.0290379	0.133624	0.119294	0.0909593	0.0638008	-0.194244	0.140942
[K].lYGGAkSR.[G]	P07280	RPS19A	0.318771	0.440227	-0.171433	-0.101914	0.100147	0.0230119	0.123858	0.063036	-0.188674	0.252242
[K].vLQALEkIGIVEISPkGGR.[R]	P07280	RPS19A	0	#N/A	-0.178049	#N/A	-0.0256974	#N/A	0.205299	#N/A	0.166503	#N/A		#N/A		#N/A		#N/A		#N/A		#N/A
[K].vLQALEk.[I]	P07280	RPS19A	0.365455	#N/A	-0.135031	#N/A	0.0678728	#N/A	0.18236	#N/A	-0.226509	#N/A		#N/A		#N/A		#N/A		#N/A		#N/A
[R].iSEnGQR.[D]	P07280	RPS19A	0.198371	0.316178	0.0214605	-0.115888	0.338408	0.215557	0.424188	0.125937	-0.329203	0.0768296
[T].sSGNEMPPQDAEGWFYkR.[A]	P07280	RPS19A	0.371518	#N/A	-0.0141806	#N/A	0.14353	#N/A	-0.134697	#N/A	-0.411424	#N/A		#N/A		#N/A		#N/A		#N/A		#N/A
[H].iDASGSINRk.[V]	P07280	RPS19A	0.17229	0.119983	-0.0732959	-0.0552709	0.212127	-0.0545969	0.0830023	-0.0152143	-0.422754	0.236107
[A].vFPSIVGRPR.[H]	P60010	ACT1	-0.0707165	#N/A	-0.266443	#N/A	-0.171598	#N/A	0.342279	#N/A	0.762075	#N/A		#N/A		#N/A		#N/A		#N/A		#N/A
[G].iMVGMGQkDSYVGDEAQSkR.[G]	P60010	ACT1	0.033316	0.206845	-0.106044	-0.122936	0.18405	0.0580225	0.181154	0.127404	-0.159018	0.0269142
[N].iVMSGGTTMFPGIAER.[M]	P60010	ACT1	0.37949	-0.117315	0.28337	0.000543378	0.148073	-0.10459	0.228549	0.0193921	-0.100634	-0.225436
[G].iVTNWDDmEk.[I]	P60010	ACT1	0.00694419	0.241021	-0.0401969	-0.0275808	0.185056	0.0431884	0.25358	0.150728	-0.12431	0.0201829
[R].vAPEEHPVLLTEAPmNPkSNR.[E]	P60010	ACT1	0.285068	0.383963	0.0719078	-0.0576336	-0.107594	-0.164727	0.139821	0.0216347	-0.416412	0.0740156
[S].iEkSYELPDGQVITIGnER.[F]	P60010	ACT1	-0.315818	0.125319	-0.111112	-0.0835015	0.287729	0.0610183	0.229923	0.00381789	-0.201784	-0.33187
[A].lAPSSMkVkIIAPPER.[K]	P60010	ACT1	-0.0877034	0.449523	-0.104879	-0.029986	0.123501	0.040447	0.131651	0.163626	-0.107674	-0.00478003
[G].fSLPHAILR.[I]	P60010	ACT1	0	0	0.292275	0	0	0	0	0	0	0
[A].lVIDnGSGMckAGFAGDDAPR.[A]	P60010	ACT1	-0.572164	0.416224	-0.252625	-0.465402	0.203596	0.132074	-0.0029904	-0.0209427	-0.237638	-0.169983
[E].lYGNIVMSGGTTMFPGIAER.[M]	P60010	ACT1	0.434573	#N/A	0.346649	#N/A	-0.0824509	#N/A	0.149885	#N/A	-0.269278	#N/A		#N/A		#N/A		#N/A		#N/A		#N/A
[A].lDFEQEMQTAAQSSSIEkSYELPDGQVITIGNER.[F]	P60010	ACT1	0.746046	#N/A	-0.143216	#N/A	0.0869317	#N/A	0.242793	#N/A	-0.39956	#N/A		#N/A		#N/A		#N/A		#N/A		#N/A
[Y].vALDFEQEMqTAAQSSSIEkSYELPDGQVITIGNER.[F]	P60010	ACT1	0	#N/A	-2.08475	#N/A	0.550123	#N/A	-0.0346654	#N/A	0.21036	#N/A		#N/A	<-3 sigma	#N/A		#N/A		#N/A		#N/A
[L].lTEAPMNPkSNR.[E]	P60010	ACT1	0.00779889	0.201289	-0.138039	-0.132929	0.0585684	-0.12315	0.128572	-0.121854	-0.0380414	0.179089
[A].lAPSSMkVk.[I]	P60010	ACT1	0.0305112	#N/A	-0.196917	#N/A	0.0365587	#N/A	0.204573	#N/A	-0.125472	#N/A		#N/A		#N/A		#N/A		#N/A		#N/A
[R].vAPEEHPVL.[L]	P60010	ACT1	0.0902145	#N/A	-0.0164422	#N/A	-0.0106922	#N/A	0.40759	#N/A	-0.0396906	#N/A		#N/A		#N/A		#N/A		#N/A		#N/A
[Y].vGDEAQSkR.[G]	P60010	ACT1	-0.0915326	0.150515	-0.066454	-0.0350159	-0.121208	0.0305845	0.21115	-0.0250711	-0.315539	0.183103
[R].INkYESSPSHIELVVTEkEEA.[V]	P46990	RPL17B	0.256862	0.361074	-0.126724	-0.0411137	0.190916	0.134327	0.199767	0.166362	-0.182969	-0.0753524
[E].lTkAQkYLEQVLDHQR.[A]	P05740	RPL17A	0.236912	0.405874	-0.065954	-0.154731	0.180383	0.0262113	0.262104	0.0990208	-0.208372	-0.096976
[E].lVVTEkEEAVAkAAEkk.[V]	P46990	RPL17B	0.209675	0.201346	-0.237949	-0.196362	0.293051	0.0488004	0.131399	0.574634	-0.214593	0.278983
[G].lLQNAAANAEAkGLDATk.[L]	P46990	RPL17B	-0.0172786	0.70269	-0.180173	-0.245401	-0.0363904	0.0254387	0.151282	-0.102619	-0.176457	-0.0682263
[A].vAkAAEkk.[V]	P46990	RPL17B	-0.0464903	0.217471	-0.176831	-0.100546	0.311575	-0.0337525	0.276926	0.129973	0.0411789	-0.0152183
[Y].vSHIQVNQAPkQR.[R]	P46990	RPL17B	0.342971	0.397402	0.0325061	-0.211104	0.201391	0.183449	0.14366	0.0639081	-0.0820978	0.104113
[R].INkYESSPSHIE.[L]	P46990	RPL17B	0.1262	0.162002	0.115255	0.0484958	0.0396474	0.0392088	0.197036	0.066649	-0.121964	0.221966
[H].iQVnQAPkQR.[R]	P46990	RPL17B	0.076304	0.229924	-0.0959884	0.000784153	0.268774	0.137339	0.181044	-0.21254	-0.134506	0.138064
[A].inGWELTkAQkYLEQVLDHQR.[A]	P05740	RPL17A	-0.271363	0	1.02725	0	-0.186435	0.447194	0.158106	0.0114362	-0.283645	-0.156048			>3 sigma
[G].aTSTNPAkSASAR.[G]	P46990	RPL17B	-0.148809	0.191022	-0.0679467	-0.0900881	0.0911532	0.0713748	0.29239	0.260206	-0.132714	0.0936884
[Y].gATSTNPAkSASAR.[G]	P46990	RPL17B	-0.146142	0.189113	-0.0897591	-0.0077356	0.16386	0.0950482	0.1229	0.0656994	0.00358952	0.0744193
[Y].lEQVLDHQR.[A]	P05740	RPL17A	0.178622	0.122616	-0.0144576	-0.0513425	0.143946	0.167953	0.222256	-0.0442367	-0.160209	-0.100078
[L].vVTEkEEAVAkAAEkk.[V]	P46990	RPL17B	0.335022	0.215854	-0.224261	-0.191323	0.280159	0.261086	0.175352	0.426826	-0.137199	0.721464
[R].iNkYESSPSHIEL.[V]	P46990	RPL17B	0.299268	0.226225	0.0400917	0.0292645	0.0214946	-0.113026	0.166617	-0.135901	-0.175517	-0.252089
[E].fGVTkAR.[W]	P46990	RPL17B	0.0162006	0.114688	-0.139273	-0.214743	0.0791327	0.0726045	0.156552	0.135934	-0.0974758	0.328983
[ED].iLGDQVEkVVVSYk.[L]	P02829	HSP82	0.181189	0.206959	-0.11496	0.00228191	0.0945917	0.00571501	0.12615	-0.0561008	-0.240045	0.130936
[Q].fGWSANMER.[I]	P02829	HSP82	-0.0496341	0.0443059	0.0378377	-0.0800618	0.100167	0.048385	0.310115	-0.0349298	0.00970657	0.0535809
[F].lkDDQLEYLEEkR.[I]	P02829	HSP82	0.00547277	0.304512	0.052021	-0.277776	0.339686	0.0152985	0.88144	1.10809	1.44304	0.538227								>3 sigma	>3 sigma		Yes
[S].lGLNIDEDEETETAPEASTEAPVEEVPADTEMEEVD.[-]	P15108	HSC82	1.31302	0	0	0.718325	0.225206	0.392684	0.776274	0.256422	-0.174946	-0.217267	>3 sigma
[A].fAkNIkLGVHEDTQNR.[A]	P15108	HSC82	-0.0015318	0.293528	-0.0466544	-0.180049	-0.0842852	0.115948	-0.0111103	0.428169	-0.255935	-0.226993
[ED].iLGDQVEk.[V]	P02829	HSP82	-0.100907	0.331206	-0.0559741	-0.0531908	-0.0796583	0.0905043	0.231489	0.0280346	-0.160718	-0.184991
[L].lTSGFSLEEPTSFASR.[I]	P15108	HSC82	0.509832	0.70309	-0.474251	-0.264128	-0.499693	0.236461	0.357111	0.0523317	-0.0510636	-0.103578
[G].lNIDEDEETETAPEASTEAPVEEVPADTEMEEVD.[-]	P15108	HSC82	0.0499938	0	0.967142	0	-0.0842295	0.234196	-0.0336276	1.45119	0.115137	-0.169297			>3 sigma					>3 sigma
[K].vkEEVQELEELNkTkP.[L]	P15108	HSC82	0.116125	0.100167	-0.231431	0.0838789	0.0313697	-0.00800739	0.371857	0.196135	-0.0393193	-0.0138861
[E].lISNASDALDkIR.[Y]	P02829	HSP82	0.163003	0.371158	0.109257	-0.0224348	0.353247	0.517365	1.27687	1.83589	2.01046	1.1191							>3 sigma	>3 sigma	>3 sigma	>3 sigma	Yes
[L].fLkDDQLEYLEEkR.[I]	P02829	HSP82	0.311939	0.239147	0.280841	-0.155571	0.371906	0.714462	1.70467	2.10722	2.16662	0.90916							>3 sigma	>3 sigma	>3 sigma		Yes
[K].lLDAPAAIR.[T]	P02829	HSP82	0.0898041	0.367634	0.0280849	-0.223852	-0.00264621	0.000937673	0.0959976	-0.0161412	-0.0763971	0.00348898
[G].fSLEEPTSFASR.[I]	P15108	HSC82	0.366335	#N/A	-0.00488033	#N/A	0.161488	#N/A	0.126635	#N/A	-0.0981596	#N/A		#N/A		#N/A		#N/A		#N/A		#N/A
[T].lVDITkDFELEETDEEkAER.[E]	P02829	HSP82	-0.216533	0.574829	-0.324045	-0.498712	-0.0575864	0.117425	0.509371	0.275171	-0.0744773	-0.154862
[A].lkDILGDQVEkVVVSYk.[L]	P15108	HSC82	-0.0148375	0.0969054	0.0342453	-0.0220408	0.101563	0.069408	0.220859	0.211039	-0.344692	0.0269997
[G].vHEDTQNR.[A]	P02829	HSP82	0.0680573	0.293345	-0.0240528	-0.00384148	0.165713	0.191623	0.0175622	0.476814	-0.0850574	0.235295
[F].gWSANMER.[I]	P02829	HSP82	0.0698221	0.231674	-0.0408701	0.0710422	0.0150128	0.100784	0.202706	0.0544058	-0.151541	-0.207772
[SA].lSDPkQLETEPDLFIR.[I]	P02829	HSP82	-0.00353296	0.0777718	0.151551	0.180937	0.389282	0.482028	1.27816	1.83446	1.64068	1.05252							>3 sigma	>3 sigma	>3 sigma	>3 sigma	Yes
[G].vVDSEDLPLNLSR.[E]	P02829	HSP82	-0.154244	0.719522	0.358823	0.190571	-0.301331	0.0397366	0.210494	-0.159819	-0.174863	0.0931171
[N].ikLGVHEDTQNR.[A]	P02829	HSP82	-0.0302901	0.298544	0.0739666	-0.216485	-0.0848806	0.086157	0.135267	0.405381	-0.079985	0.0683187
[L].lDAPAAIR.[T]	P02829	HSP82	0.0660994	-0.0499341	0.0379242	-0.0884136	0.129169	0.0715655	0.203646	0.111094	-0.209303	-0.0120996
[S].lTDYVTR.[M]	P02829	HSP82	-0.194421	0.206572	0.051171	-0.0752389	0.111566	0.0754907	0.351729	0.630718	0.083827	0.196891
[K].lGVHEDTQNR.[A]	P02829	HSP82	0.225685	#N/A	0.000390266	#N/A	-0.511554	#N/A	-0.0827948	#N/A	0.0851915	#N/A		#N/A		#N/A		#N/A		#N/A		#N/A
[K].lLDAPAA.[I]	P02829	HSP82	-0.110951	0.0374083	0.178764	0.00251631	0.034105	0.467526	0.14582	0.150441	-0.434591	-1.59544										<-3 sigma
[K].vVVSYkL.[L]	P02829	HSP82	0.0122616	-0.0517046	-0.1472	-0.124781	0.0526059	0.0295586	0.284523	0.104477	-0.158281	0.315782
[A].iLFIPkR.[A]	P02829	HSP82	-0.422753	0	0.392362	0	0.807344	0	0.106971	0.0771966	-0.293568	-0.137432
[K].vkEEVQELEELNkTkPLWTR.[N]	P15108	HSC82	0.444588	#N/A	0.282396	#N/A	-0.22188	#N/A	0.319836	#N/A	0.557276	#N/A		#N/A		#N/A		#N/A		#N/A		#N/A
[M].vLIGPPGAGkGTQAPnLQER.[F]	P07170	ADK1	-0.031625	0.406062	0.134268	-0.0837749	0.0278448	0.0884855	0.200103	0.29824	-0.24237	0.347543
[KG].fILDGFPR.[KT]	P07170	ADK1	-0.276015	0.101302	0.0130082	0.167082	0.0418984	0.169591	0.185298	0.181377	-0.198134	-0.0822649
[V].lIGPPGAGkGTQAPNLQER.[F]	P07170	ADK1	0.0771071	0.376108	0.198844	0.0785053	-0.0528652	0.128562	0.225945	0.119785	-0.243835	0.0793755
[H].lATGDMLR.[S]	P07170	ADK1	0.165563	0.465825	0.0609625	-0.0136523	-0.0845808	0.0227218	0.126023	0.0504351	-0.105375	0.149415
[Q].iAkGTQLGLEAkk.[I]	P07170	ADK1	0.00604764	0.169297	0.0728568	0.118296	0.0687213	0.116053	0.298373	0.145975	-0.266918	-0.0261035
[K].iFNPPkEDMkDDVTGEALVQR.[S]	P07170	ADK1	0.209899	0.253878	0.0588287	0.074004	0.0313471	0.102887	0.19227	0.113156	-0.173535	-0.0103589
[R].lAAYHAQTEPIVDFYkkTG.[I]	P07170	ADK1	0.418226	0.206426	0.0900494	-0.095443	-0.0237235	-0.00370209	0.219994	0.0815957	-0.275665	-0.00655594
[E].lkVDDELLVAR.[I]	P07170	ADK1	0.18173	0.443877	0.0692918	0.150242	0.0396102	0.09318	0.327551	-0.0019637	-0.122939	-0.0332151
[K].iFNPPkEDMkDDVTGEA.[L]	P07170	ADK1	0.0842924	0.163644	-0.0288239	-0.163308	0.175129	0.190784	0.225106	-0.0253504	-0.0679137	0.3289
[M].lkEQGTPLEkAIELkVDDELLVAR.[I]	P07170	ADK1	0.241538	#N/A	0.119832	#N/A	0.320174	#N/A	0.0187408	#N/A	-0.135822	#N/A		#N/A		#N/A		#N/A		#N/A		#N/A
[T].vWADILNkLGkD.[-]	P07170	ADK1	-0.347029	#N/A	0.414133	#N/A	-0.141174	#N/A	-0.293644	#N/A	-0.33055	#N/A		#N/A		#N/A		#N/A		#N/A		#N/A
[G].vDASQPPATVWADILNk.[L]	P07170	ADK1	1.18854	#N/A	1.1328	#N/A	-0.231129	#N/A	0.140393	#N/A	-0.500752	#N/A	>3 sigma	#N/A	>3 sigma	#N/A		#N/A		#N/A		#N/A	Yes
[T].vWADILNk.[L]	P07170	ADK1	0.0668917	0.62336	-0.0124404	0.131779	-0.0472393	0.0556218	0.181056	-0.0373272	-0.123004	0.211783
[H].aAHLATGDMLR.[S]	P07170	ADK1	0.802696	#N/A	0.0235453	#N/A	0.440341	#N/A	0.11169	#N/A	-0.655735	#N/A		#N/A		#N/A		#N/A		#N/A		#N/A
[L].iGPPGAGkGTQAPNLQER.[F]	P07170	ADK1	0.213692	0.230027	0.0011486	-0.0837679	0.0150584	0.0665589	0.215354	0.0629244	-0.241186	0.0824242
[FW].iLDGFPR.[KT]	P07170	ADK1	-0.131497	0.233003	-0.263102	0.164688	-0.11432	0.103437	0.140839	0.130134	-0.159173	0.116081
[R].sYHkIFNPPkEDMkDDVTGEALVQR.[S]	P07170	ADK1	0.970834	0.56475	-0.174112	-0.252145	0.41635	-0.0768393	0.0278568	0.359974	0.182455	-0.226082	>3 sigma
[Q].lGLEAkk.[I]	P07170	ADK1	-0.0782341	#N/A	0.0364754	#N/A	-0.135556	#N/A	0.329171	#N/A	0.11491	#N/A		#N/A		#N/A		#N/A		#N/A		#N/A
[L].iHPASGR.[S]	P07170	ADK1	0.139976	0.23864	-0.238702	-0.111905	-0.168262	0.0807771	0.0566888	0.123706	0.202136	0.129715
[A].lVNYTDDIkQSASATR.[R]	P16861	PFK1	0.250112	0.517231	-0.0985302	-0.0707896	0.199264	0.0347412	0.291416	0.0791633	0.0308942	-0.0170389
[G].iLENkIIR.[M]	P16861	PFK1	-0.228619	-0.200727	-0.0673189	0.258498	0.112179	0.156593	0.165293	0.164342	-0.0136075	0.474903
[R].FTkEEVAPYkNLS.[I]	P16861	PFK1	0.12723	0.114693	0.072513	0.12265	0.182028	-0.00169781	0.0488603	-0.000344108	-0.122509	0.0345338
[S].lLSSGTSQDSLR.[E]	P16861	PFK1	0.217626	0.225433	0.0287976	-0.126907	0.109941	0.0879999	0.155416	0.125805	-0.0875344	0.0105652
[G].lAnATDSAPTSkDAFLEATSEDEIISR.[A]	P16861	PFK1	0.271043	0.603463	0.0344153	0.0963671	0.238003	0.0142069	0.170354	0.131182	-0.184804	0.123856
[A].fVVEVMGR.[HN]	P16861	PFK1	0.235741	#N/A	0.0482715	#N/A	0.0927334	#N/A	0.224026	#N/A	0.128103	#N/A		#N/A		#N/A		#N/A		#N/A		#N/A
[E].vHWAEYNkIGDILSGR.[L]	P16861	PFK1	0.292088	#N/A	0.143024	#N/A	0.469283	#N/A	0.0484729	#N/A	-0.164074	#N/A		#N/A		#N/A		#N/A		#N/A		#N/A
[G].lVGSIDNDmSGTDSTIGAYSALER.[I]	P16861	PFK1	0.300225	0.843269	0.156298	-0.152175	0.240415	-0.0527555	0.109398	-0.052812	-0.156851	-0.0520969
[N].iGIVHVGAPSAALNAATR.[A]	P16861	PFK1	0.136062	-0.0160083	-0.0919672	-0.126138	0.18723	0.0493763	0.110323	0.0737281	-0.260931	0.431163
[N].lWENETNVELR.[K]	P16861	PFK1	0.567319	0.515844	-0.0199148	-0.203276	0.112683	0.151669	0.00511858	0.105793	0.00766608	-0.0974131
[G].iATGADYIFIPER.[A]	P16861	PFK1	0.201955	0.612796	0.122797	-0.0442967	0.087159	0.0928359	0.119626	0.0168424	-0.0690476	0.0484932
[S].lVDELVAEGR.[F]	P16861	PFK1	0.201062	0.545824	-0.0106778	-0.00468362	0.231801	0.112471	0.131362	0.0473216	-0.0289845	-0.0771361
[F].lSTTVkDDGSELLPVSDR.[L]	P16861	PFK1	0.146525	#N/A	-0.1434	#N/A	0.0621525	#N/A	0.0236368	#N/A	-0.255841	#N/A		#N/A		#N/A		#N/A		#N/A		#N/A
[E].vWLESFkLSEVDASGFR.[I]	P16861	PFK1	0.411901	#N/A	-0.0399529	#N/A	0.126951	#N/A	0.239364	#N/A	-0.265848	#N/A		#N/A		#N/A		#N/A		#N/A		#N/A
[T].aIPGHVQQGGVPSSkDR.[V]	P16861	PFK1	0.20418	0.541885	0.0599082	0.0493975	0.101203	-0.0152567	0.336922	0.196476	-0.0141568	0.0702867
[L].lSSGTSQDSLR.[E]	P16861	PFK1	0.173194	0.549856	0.114063	-0.10981	0.126487	0.00747295	0.243309	0.255036	-0.00274037	-0.10851
[W].lSEGGTLIGTAR.[S]	P16861	PFK1	0.0572722	-0.054475	0.16286	-0.21059	0.122722	0.100306	0.241687	0.141934	-0.192409	-0.32968
[L].iGILENkIIR.[M]	P16861	PFK1	1.05487	0	0.174026	0.690456	0.0806326	0.101086	0.339647	0.77026	-0.347905	0.441778	>3 sigma
[D].iISEASkGkFGVR.[T]	P16861	PFK1	-0.00348087	#N/A	-0.0024223	#N/A	0.277495	#N/A	0.302573	#N/A	-0.228296	#N/A		#N/A		#N/A		#N/A		#N/A		#N/A
[Y].fSTDLNk.[I]	P16861	PFK1	-0.0435135	0.290494	-0.0914436	0.035942	0.168882	0.0335518	0.254093	0.162055	-0.130885	-0.0793028
[S].lTGADLFR.[HS]	P16861	PFK1	-0.146897	#N/A	-0.086265	#N/A	0.365535	#N/A	0.153624	#N/A	0.0397333	#N/A		#N/A		#N/A		#N/A		#N/A		#N/A
[L].iGILENk.[I]	P16861	PFK1	0.106726	0.314848	-0.0703004	0.0247392	0.135362	0.161271	0.263013	0.114142	-0.175448	-0.156355
[N].fLSTTVkDDGSELLPVSDR.[L]	P16861	PFK1	0.835866	#N/A	-0.362023	#N/A	0.115472	#N/A	0.0268112	#N/A	-0.0757609	#N/A		#N/A		#N/A		#N/A		#N/A		#N/A
[H].vGAPSAALNAATR.[A]	P16861	PFK1	0.363098	-0.432205	0.229745	0.248215	0.264099	-0.00693228	0.108729	0.00214938	-0.183847	0.197551
[T].lLkENFR.[H]	P16861	PFK1	0.0376419	#N/A	0.000848791	#N/A	0.181846	#N/A	0.2443	#N/A	-0.00962949	#N/A		#N/A		#N/A		#N/A		#N/A		#N/A
[Q].ikGSIDITTTnSYEkEkLQER.[L]	P19882	HSP60	-0.0333803	0.31817	-0.027476	0.0731223	0.240759	0.232405	0.109348	0.109282	-0.113826	-0.528793
[G].iLPGGGTALVkASR.[V]	P19882	HSP60	0.395973	0.30727	-0.00587766	-0.0695024	-0.143685	0.0153928	0.0893459	0.0928787	-0.191728	0.156299
[L].lQEVASkTNEAAGDGTTSATVLGR.[A]	P19882	HSP60	0.052193	0.740454	0.78013	-0.394125	-0.0637877	0.13606	0.586133	0.123955	-0.230574	0.236151
[K].iTkDGVTVAkS.[I]	P19882	HSP60	0.178402	0.546537	-0.0199356	-0.163943	-0.194619	-0.0207705	0.0944746	0.100276	-0.191643	0.268321
[K].lSGGVAVIR.[V]	P19882	HSP60	0.0845237	0.184979	0.131064	-0.170854	-0.0519048	0.059736	0.288825	-0.0401943	-0.0778336	0.206293
[Q].iIENAGEEGSVIIGk.[L]	P19882	HSP60	0.18789	#N/A	0.0311344	#N/A	0.0891879	#N/A	0.216856	#N/A	-0.245077	#N/A		#N/A		#N/A		#N/A		#N/A		#N/A
[L].lASAMEkVGkEGVITIR.[E]	P19882	HSP60	0.0381718	0.285894	-0.0975464	0.104803	-0.120957	0.114167	0.226789	-0.0190406	-0.295589	0.275642
[S].iTVTkEDTVILnGSGPkEAIQER.[I]	P19882	HSP60	0.299102	0.69224	0.112296	0.474918	0.000619097	0.091262	0.310491	-0.00328216	-0.324982	-0.181564
[N].vLIEQPFGPPk.[I]	P19882	HSP60	-0.665441	0.158538	0.0314853	-0.541845	0.0547051	0.17152	0.251896	-0.0806625	-0.274565	-0.484756
[S].iVLkDkFENMGAk.[L]	P19882	HSP60	0.130453	0.248587	0.0392582	-0.236298	-0.00442673	0.0584295	0.235688	0.217995	-0.273895	0.0153774
[S].iQDILPALEISNQSR.[R]	P19882	HSP60	0	0	0.821918	0	0.448988	-1.70679	-0.0644388	-0.0209159	0.0439472	0.104548						<-3 sigma
[K].iSSIQDILPALEISNQSR.[R]	P19882	HSP60	0	0	0.313489	0.328758	-0.195992	0.736181	0.260659	1.16179	0.0855565	0								>3 sigma
[L].lLSEkkISSIQDILPALEISNQSR.[R]	P19882	HSP60	0.00177439	#N/A	-0.151726	#N/A	0.133822	#N/A	0.278108	#N/A	-0.0632334	#N/A		#N/A		#N/A		#N/A		#N/A		#N/A
[K].lLASAMEkVGkEGVITIR.[E]	P19882	HSP60	0.30805	0.456048	-0.00205798	-0.23773	-0.226163	-0.605795	0.183475	-0.0637577	-0.340327	0.0855329
[M].lATGIIDPFkVVR.[S]	P19882	HSP60	-0.429258	#N/A	0.0598122	#N/A	0.224584	#N/A	-0.0684695	#N/A	-0.160088	#N/A		#N/A		#N/A		#N/A		#N/A		#N/A
[T].iSAnGDSHVGk.[L]	P19882	HSP60	0.223404	0.0988838	-0.187479	0.0333442	0.172624	0.104347	0.271171	0.116998	0.145076	-0.0904611
[K].lLQEVASkTnEAAGDGTTSATVLGR.[A]	P19882	HSP60	-0.128891	0	0.715267	-0.191649	-0.038955	0.112715	0.252864	0.0630845	-0.083419	-0.0543854
[E].vASkTNEAAGDGTTSATVLGR.[A]	P19882	HSP60	-0.246955	0.122467	-0.206654	-0.226119	0.123387	-0.10214	0.0390637	0.279879	-0.123613	-0.0628297
[A].vkAPGFGDNR.[K]	P19882	HSP60	0.484594	0.359018	-0.0815079	-0.0274061	0.0130412	0.115896	0.250384	0.128929	-0.0949376	-0.0356454
[A].iTRPAkQIIENAGEEGSVIIGk.[L]	P19882	HSP60	0.461327	#N/A	-0.0439758	#N/A	0.268237	#N/A	0.0389059	#N/A	0.00326007	#N/A		#N/A		#N/A		#N/A		#N/A		#N/A
[L].aTGIIDPFkVVR.[S]	P19882	HSP60	1.09671	-0.700388	-0.065969	-0.105665	-0.182045	0.107098	0.0978387	0.222124	-0.192582	-0.14683	>3 sigma
[E].lkFGVEGR.[A]	P19882	HSP60	0.197279	0.441779	-0.177603	-0.00373526	-0.0635829	0.018746	0.145539	0.150813	-0.151615	0.0978854
[G].iIDPFkVVR.[S]	P19882	HSP60	-0.110435	-0.133702	-0.117331	0.108275	0.165675	0.0358418	0.169593	0.0493555	-0.421802	0.0324032
[P].lLLLSEkk.[I]	P19882	HSP60	-0.516822	#N/A	0.327269	#N/A	-0.349145	#N/A	0.210419	#N/A	0.129028	#N/A		#N/A		#N/A		#N/A		#N/A		#N/A
[GI].iIDPFk.[VS]	P19882	HSP60	-0.34931	-0.052281	-0.29169	0.168371	0.0716671	0.118465	0.180882	-0.584005	-0.13363	-1.09625										<-3 sigma
[G].iLPGGGTALVk.[A]	P19882	HSP60	0.135982	#N/A	-0.33861	#N/A	0.0013329	#N/A	0.229504	#N/A	-0.209262	#N/A		#N/A		#N/A		#N/A		#N/A		#N/A
[K].vGkEGVITIR.[E]	P19882	HSP60	-0.38695	#N/A	-0.0723061	#N/A	-0.235097	#N/A	-0.0470359	#N/A	-0.103604	#N/A		#N/A		#N/A		#N/A		#N/A		#N/A
[R].iINEPTAAAIAYGLDkkSQk.[E]	P22202	SSA4	0.341314	#N/A	0.0679765	#N/A	0.042151	#N/A	0.034743	#N/A	-0.327104	#N/A		#N/A		#N/A		#N/A		#N/A		#N/A
[R].VIPDFMLQGGDFTAGnGTGGkS.[I]	P14832	CPR1	0.0445797	0.460707	0.163839	0.0320346	0.169142	0.0345413	0.0783366	0.0652308	-0.225567	-0.0800178
[D].iVkkVESLGSPSGATkAR.[I]	P14832	CPR1	0.237924	0.157422	0.0954669	-0.0439655	0.209607	0.233662	0.275921	0.226097	-0.241534	-0.0991748
[Y].fDVEADGQPIGR.[V]	P14832	CPR1	0.219354	0.273214	-0.14851	0.15477	-0.0643127	0.0667053	0.191037	0.0234569	0.0233035	-0.0983758
[G].fGYAGSPFHR.[V]	P14832	CPR1	0.521562	0.261695	0.334548	-0.0767522	0.0856946	0.148032	0.142711	0.0110545	0.0277173	0.0287367
[K].lYnDIVPkTAEnFRA.[L]	P14832	CPR1	0.0411453	0.456853	-0.0656099	0.0451124	0.171674	0.0428196	0.211721	0.18371	-0.161374	0.0618731
[K].lYNDIVPkTAEnFR.[A]	P14832	CPR1	0.20555	0.52129	-0.138669	-0.00488885	0.215684	0.0675384	0.195169	0.139284	-0.271618	-0.044256
[K].lYNDIVPkTAEN.[F]	P14832	CPR1	0.50548	0.645898	-0.0570163	0.118016	0.170527	-0.00290402	0.169372	0.11807	-0.172897	0.0738311
[Q].vYFDVEADGQPIGR.[V]	P14832	CPR1	-0.076029	0.244145	0.0960032	-0.149165	-0.0478268	0.07336	0.145169	0.104545	-0.209064	-0.0186891
[S].lGSPSGATkAR.[I]	P14832	CPR1	-0.0642315	0.142413	0.284776	-0.112549	-0.0473827	0.069951	0.272231	0.142249	-0.0713741	0.0343797
[F].dVEADGQPIGR.[V]	P14832	CPR1	0.164739	0.210745	-0.321923	-0.153835	-0.252316	0.0787847	0.558482	0.00900447	-0.0456447	-0.420678
[L].gSPSGATkAR.[I]	P14832	CPR1	0.110963	0.152327	0.441441	0.0963866	0.115681	-0.125261	0.184695	0.0240817	-0.17512	0.0574373
[H].vVFGEVVDGYDIVkkVESLGSPSGATkAR.[I]	P14832	CPR1	0	#N/A	0	#N/A	-0.116051	#N/A	0.48595	#N/A	-0.305227	#N/A		#N/A		#N/A		#N/A		#N/A		#N/A
[R].iVVAkSGEL.[-]	P14832	CPR1	-0.289406	-0.115293	0.180341	0.0934665	-0.20774	0.0330669	0.145817	0.288665	-0.042375	0.116335
[D].iVPkTAEnFR.[A]	P14832	CPR1	0.088247	0.297254	0.0186563	0.119464	0.0773983	-0.0366242	0.228188	0.241542	-0.139015	0.111547
[G].vVGYVETPR.[G]	P14126	RPL3	0.0630238	0.278009	0.0361243	-0.110124	0.193187	0.0887648	0.0719659	0.0690424	-0.107036	0.0518958
[H].lAEIQLnGGSISEkVDWAR.[E]	P14126	RPL3	0.132555	0.904432	0.00302689	0.302274	0.0565229	-0.0899498	0.261567	-0.0450795	-0.17891	0.126954
[T].vWAEHLSDEVkR.[R]	P14126	RPL3	0.630099	0.413144	0.135745	-0.0645655	0.152611	0.327298	0.200343	0.0311745	0.0342123	-0.151568
[H].lAEIQLnGGSISEk.[V]	P14126	RPL3	0.143531	#N/A	0.311586	#N/A	0.297205	#N/A	0.138999	#N/A	-0.316293	#N/A		#N/A		#N/A		#N/A		#N/A		#N/A
[P].lAQkkAHLAEIQLnGGSISEkVDWAR.[E]	P14126	RPL3	0	#N/A	-0.020155	#N/A	-0.0460717	#N/A	0.0433357	#N/A	-0.399964	#N/A		#N/A		#N/A		#N/A		#N/A		#N/A
[E].iQLnGGSISEkVDWAR.[E]	P14126	RPL3	-0.210756	0.343574	0.231594	0.0885164	0.20668	0.0842356	0.0884757	0.047074	-0.167015	0.303612
[S].lkWIDTASk.[F]	P14126	RPL3	0.19239	0.0713695	-0.133411	-0.1195	0.219817	0.269663	0.243489	0.197165	-0.22528	0.151185
[S].lkWIDTASkFGkGR.[F]	P14126	RPL3	-0.311907	0.388701	0.195836	-0.230825	-0.139399	-0.0420824	0.202295	0.162649	-0.238238	0.198241
[Q].lnGGSISEkVDWAR.[E]	P14126	RPL3	0.297232	0.348328	0.0532657	-0.00473907	0.15024	0.137357	0.205467	0.0692474	-0.00784202	0.0706375
[R].vGkGDDEAnGATS.[F]	P14126	RPL3	0.103087	0.144391	0.010814	-0.0603961	0.208471	0.0453266	0.303548	0.110901	-0.0356057	0.12195
[K].yAQDGAGIERE.[L]	P14126	RPL3	0.601833	#N/A	0.250854	#N/A	0.253447	#N/A	0.239199	#N/A	-0.038923	#N/A		#N/A		#N/A		#N/A		#N/A		#N/A
[A].iAVTkGHGFEGVTHR.[W]	P14126	RPL3	0.249598	0.143472	-0.0963064	-0.369162	0.0996358	0.0685387	0.171367	0.163296	-0.00363226	0.116716
[T].vAVDSVFEQNEMIDAIAVTkGHGFEGVTHR.[W]	P14126	RPL3	0	0	0.164819	0	0.392679	-1.70652	0.179317	0.995901	-0.151062	1.4629						<-3 sigma		>3 sigma		>3 sigma
[R].vGkGDDEAnGATSFDR.[T]	P14126	RPL3	-0.0202168	0.319343	0.0572223	-0.00352378	0.0605578	0.150289	0.176066	0.0765333	-0.081705	0.0827326
[F].iMVkGcIPGNR.[K]	P14126	RPL3	0.0435689	0.495175	-0.0356871	-0.0375176	0.211558	0.0489394	0.12157	0.156355	-0.166772	-0.0122384
[W].iDTASkFGkGR.[F]	P14126	RPL3	0.314867	0.193262	-0.191922	-0.102605	0.184035	0.144664	0.194012	0.156064	-0.0905245	0.183845
[Y].aQDGAGIER.[E]	P14126	RPL3	0.095142	0.109006	-0.102354	-0.176609	0.00539497	0.226541	0.206952	0.0753896	0.0383206	0.51033
[R].FQTPAEkHA.[F]	P14126	RPL3	0.255924	#N/A	-0.113976	#N/A	0.206973	#N/A	0.240394	#N/A	-0.0438302	#N/A		#N/A		#N/A		#N/A		#N/A		#N/A
[S].lYTNTSR.[K]	P14126	RPL3	0.248625	0.358566	0.00557015	-0.0524924	0.12728	0.112181	0.0811136	0.0725218	-0.0503049	0.0609692
[A].fMGTLkkDL.[-]	P14126	RPL3	0.250673	#N/A	0.0728407	#N/A	-0.0446055	#N/A	0.0406528	#N/A	-0.153706	#N/A		#N/A		#N/A		#N/A		#N/A		#N/A
[R].vkAFPkDDR.[S]	P14126	RPL3	0.184622	0.317153	-0.0597779	-0.118294	0.131596	0.143364	0.281527	0.179804	-0.191942	-0.0916503
[H].lGFLPR.[K]	P14126	RPL3	0.163478	#N/A	-0.164407	#N/A	0.21445	#N/A	0.451213	#N/A	-0.00300699	#N/A		#N/A		#N/A		#N/A		#N/A		#N/A
[K].vLLDSkDVQQIDYkLES.[F]	P26786	RPS7A	0.098051	0.24317	0.0454994	-0.0573081	0.0407748	0.170537	0.237068	9.72249e-05	-0.211728	-0.0610931
[K].iQkVLLDSkDVQQIDYkLES.[F]	P26786	RPS7A	0.59689	#N/A	0.154138	#N/A	0.224594	#N/A	0.25986	#N/A	-0.436171	#N/A		#N/A		#N/A		#N/A		#N/A		#N/A
[D].lVFPTEIVGkR.[V]	P26786	RPS7A	0.128691	0.140329	-0.0477303	-0.110009	0.215689	-0.135952	0.34453	0.00821475	-0.198532	-0.13435
[Q].iVFEIPSETH.[-]	P26786	RPS7A	0.153124	0.153312	-0.0572041	-0.0785925	0.149919	-0.0182774	0.223991	-0.054494	-0.0557307	0.0334475
[K].lTGkQIVFEIPSETH.[-]	P26786	RPS7A	0.170999	0.196465	-0.1224	-0.176884	-0.0556765	0.0248855	0.104102	0.114914	-0.23153	0.0732912
[LM].vFPTEIVGkR.[V]	P26786	RPS7A	0.0258607	0.100765	-0.0674423	-0.0460092	0.1059	0.144965	0.255331	0.16812	-0.13924	0.207409
[Q].iDYkLESFQAVYNk.[L]	P26786	RPS7A	-0.219981	#N/A	-0.322221	#N/A	-0.106198	#N/A	0.174082	#N/A	-0.377659	#N/A		#N/A		#N/A		#N/A		#N/A		#N/A
[K].iQkVLLDSkDVQQ.[I]	P26786	RPS7A	0.0518614	-0.00992837	-0.0266642	0.0255903	0.333021	0.20069	0.0314488	0.0390828	-0.258686	0.0882001
[L].lDSkDVQQIDYkLESFQAVYNk.[L]	P26786	RPS7A	-0.304068	#N/A	-0.0812031	#N/A	0.00682759	#N/A	0.171574	#N/A	-0.0343903	#N/A		#N/A		#N/A		#N/A		#N/A		#N/A
[K].iLSQAPTELELQVAQA.[F]	P26786	RPS7A	-0.0089843	-0.147821	0.308878	-0.777713	0.316417	0.125459	0.354105	-0.106491	-0.221851	-0.520011
[K].vLLDSkDVQQIDYkLESFQA.[V]	P26786	RPS7A	-0.0127912	0.734326	0.151122	0.20031	0.0934405	0.225046	0.200353	0.792726	-0.0943139	0.851074
[K].iQkVLLDSkDVQQIDYkLESFQA.[V]	P26786	RPS7A	0.737475	#N/A	-0.108718	#N/A	0.21724	#N/A	0.297015	#N/A	-0.0477909	#N/A		#N/A		#N/A		#N/A		#N/A		#N/A
[T].lTAVHDkILEDLVFPTEIVGkR.[V]	P26786	RPS7A	1.12447	0	-0.0142977	-0.0364392	0.0740592	-0.0356456	0.0705772	0.382691	-0.262808	-0.167208	>3 sigma
[V].lLDSkDVQQIDYkLESFQAVYNk.[L]	P26786	RPS7A	0	#N/A	-0.525712	#N/A	0.132768	#N/A	0.148885	#N/A	-0.436892	#N/A		#N/A		#N/A		#N/A		#N/A		#N/A
[A].vHDkILEDLVFPTEIVGkR.[V]	P26786	RPS7A	0.212742	0.618193	-0.0369465	-0.0916108	0.159881	0.17842	0.249375	-0.114533	-0.0381247	0.0129456
[T].aVHDkILEDLVFPTEIVGkR.[V]	P26786	RPS7A	-0.408989	0.674979	0.190782	0.0616377	-0.151275	-0.322634	0.294493	0.146783	-0.271226	-0.114607
[S].lAGFHkVQTk.[L]	P26786	RPS7A	0.199663	0.178878	-0.142021	-0.257991	-0.140497	-0.196413	-0.0106297	0.0704963	-0.153007	0.0908681
[Y].lVGGNkIQk.[V]	P26786	RPS7A	-0.0333526	0.334799	-0.206275	-0.0808189	0.201765	0.115394	0.260695	0.179876	-0.00933029	0.226437
[K].vLLDSkDVQQ.[I]	P26786	RPS7A	0.255809	0.240605	0.0582466	-0.109002	0.160552	0.0974709	0.118239	0.0214835	-0.162789	0.0951699
[H].vIFLAER.[R]	P26786	RPS7A	0.455698	0.195257	-0.0088812	-0.22993	-0.47483	-0.352324	-0.0191881	0.0343794	-0.0521482	0.240611
[K].vLLDSkDVQQIDYkLESFQ.[A]	P26786	RPS7A	0	#N/A	-0.00826104	#N/A	-0.267521	#N/A	0.0495445	#N/A	0.234664	#N/A		#N/A		#N/A		#N/A		#N/A		#N/A
[K].iLSQAPTELELQ.[V]	P26786	RPS7A	0.150703	0.220033	0.101665	-0.364123	0.118825	0.137693	0.200342	0.103461	-0.1159	-0.26312
[G].fHkVQTk.[L]	P26786	RPS7A	0.186417	0.243251	-0.107105	-0.102778	0.108831	0.0336819	0.252403	0.146396	-0.14649	-0.0238291
[P].lQFkSIR.[E]	P26786	RPS7A	0.459452	-0.420242	0.12203	-0.160749	-0.326325	0.021755	0.0872427	0.155837	-0.144376	0.242119
[S].fQAVYNk.[L]	P26786	RPS7A	0.153165	0.281431	-0.111255	-0.0329024	-0.0640391	-0.0086989	0.11184	0.0814791	-0.0805797	-0.0130677
[A].fVELENSSPELkAELRPLQFkSIR.[E]	P26786	RPS7A	1.70835	#N/A	0.029297	#N/A	0.0205567	#N/A	0.322115	#N/A	0.370996	#N/A	>3 sigma	#N/A		#N/A		#N/A		#N/A		#N/A
[Y].lVGGNkIQkVLLDSkDVQQIDYk.[L]	P26786	RPS7A	0.455734	#N/A	-0.103463	#N/A	0.0379422	#N/A	0.252083	#N/A	-0.0267677	#N/A		#N/A		#N/A		#N/A		#N/A		#N/A
[R].iIkADDHASVQINVAkVDEEGR.[A]	P0C0V8	RPS21A	-0.0295615	0.237591	-0.0493238	-0.14263	0.214333	0.00231339	0.273391	0.317095	-0.286583	-0.27796
[R].lAQNDGLLkNVWS.[Y]	P0C0V8	RPS21A	0.740562	0.257863	-0.11452	-0.241047	0.114435	0.166223	0.217857	0.181331	-0.163776	0.104876
[R].lAQnDGLLkN.[V]	P0C0V8	RPS21A	0.144819	0.265421	-0.0461106	-0.0276649	0.153003	0.136636	0.0897014	0.046344	-0.113348	0.0798365
[R].lAQnDGLLkNVWSYSR.[-]	P0C0V8	RPS21A	0.236673	0.482187	-0.223749	0.0731435	-0.215009	0.0122566	0.0182211	0.0307266	-0.179192	-0.0161756
[R].iIkADDHASVQIN.[V]	P0C0V8	RPS21A	1.44149	0.149283	0.0280006	-0.111313	0.0411271	0.0683352	0.292257	-0.257587	-0.321823	0.11857	>3 sigma
[S].vQINVAkVDEEGR.[A]	P0C0V8	RPS21A	0.0928188	0.252055	-0.167725	-0.12727	0.218797	0.0996939	0.218848	0.0254554	-0.0549573	-0.0826687
[Q].lVELYVPR.[K]	P0C0V8	RPS21A	0.513138	0.349845	0.0646765	0.0311308	0.244089	-0.012343	0.110931	0.0383986	-0.335963	-0.0483352
[N].vAkVDEEGR.[A]	P0C0V8	RPS21A	0.155255	0.289293	-0.114558	-0.114185	0.089988	0.0397877	0.228476	0.0481662	-0.186868	0.102687
[I].nVAkVDEEGR.[A]	P0C0V8	RPS21A	0.433558	0.150742	0.0350515	0.0288162	0.0805861	0.0419974	0.2264	-0.0616054	-0.441533	0.154097
[R].lAQNDGLLkNVWSY.[S]	P0C0V8	RPS21A	1.0526	#N/A	-0.00508782	#N/A	0.434062	#N/A	0.0135013	#N/A	0.0880675	#N/A	>3 sigma	#N/A		#N/A		#N/A		#N/A		#N/A
[R].IIkADDHASVQ.[I]	P0C0V8	RPS21A	#N/A	0.196984	#N/A	-0.0821853	#N/A	0.164697	#N/A	0.277938	#N/A	-0.0202078	#N/A		#N/A		#N/A		#N/A		#N/A
[Q].iNVAkVDEEGR.[A]	P0C0V8	RPS21A	0.224654	0.209707	-0.0527491	-0.114844	0.220253	0.115925	0.256812	0.0626677	-0.0561242	0.0883223
[R].IIkADDHAS.[V]	P0C0V8	RPS21A	0.156605	0.291705	-0.0477107	-0.0587799	0.193322	0.267575	0.41483	-0.347549	0.0413859	-0.329932
[Y].aLSGYVR.[S]	P0C0V8	RPS21A	0.32619	0.577719	0.0575642	-0.0254174	0.182877	0.081895	0.096153	-0.0628541	-0.104328	0.127963
[V].akVDEEGR.[A]	P0C0V8	RPS21A	-0.141625	0.235454	0.464991	0.115748	-0.411722	0.0690701	0.265685	-0.230541	-0.671726	-0.120852
[E].lTkAQkYLDQVLDHQR.[A]	P46990	RPL17B	0.291906	0.198455	-0.136997	-0.236278	0.0767236	-0.117664	0.300392	0.135537	-0.0832869	0.0937092
[A].inGWELTkAQkYLDQVLDHQR.[A]	P46990	RPL17B	-0.344041	#N/A	0.864238	#N/A	0.241071	#N/A	-0.0183481	#N/A	-0.328546	#N/A		#N/A		#N/A		#N/A		#N/A		#N/A
[Y].lDQVLDHQR.[A]	P46990	RPL17B	0.143483	0.252259	0.0619819	-0.116862	0.0380887	0.170278	0.123838	0.0477051	-0.155937	-0.141112
[A].vVESVGAEVDEAR.[I]	P02400	RPP2B	0.2126	0.150813	-0.0175745	-0.0867939	0.12747	-0.0922394	0.143263	0.0631532	0.00300076	0.171302
[S].lEGkGSLEEIIAEGQkk.[F]	P02400	RPP2B	-0.0265621	0.0768331	-0.211171	-0.342838	0.130961	0.191477	0.15927	0.195856	-0.151436	-0.113628
[G].aAAGGDAAEEEkEEEAkEESDDDMGFGLFD.[-]	P02400	RPP2B	0.132621	#N/A	0.458683	#N/A	2.13745	#N/A	0.495901	#N/A	-0.179709	#N/A		#N/A		#N/A	>3 sigma	#N/A		#N/A		#N/A
[S].vGAEVDEAR.[I]	P02400	RPP2B	0.0921668	0.0757506	-0.0347878	-0.0449558	0.194413	0.173975	0.155968	0.125572	-0.0312201	-0.0081606
[E].lLSSLEGkGSLEEIIAEGQkk.[F]	P02400	RPP2B	0.28297	0.501939	-0.0698631	0.0748441	0.256256	-0.211765	0.197256	0.0939225	-0.162801	-0.348159
[S].aADIkAVVESVGAEVDEAR.[I]	P02400	RPP2B	0.313862	#N/A	0.0224432	#N/A	0.231788	#N/A	0.00305001	#N/A	0.0172952	#N/A		#N/A		#N/A		#N/A		#N/A		#N/A
[L].vQGGnAAPSAADIkAVVESVGAEVDEAR.[I]	P02400	RPP2B	-1.48176	#N/A	0.600511	#N/A	0.0307133	#N/A	0.215396	#N/A	-0.00597781	#N/A	<-3 sigma	#N/A		#N/A		#N/A		#N/A		#N/A
[L].lVQGGnAAPSAADIkAVVESVGAEVDEAR.[I]	P02400	RPP2B	0.344204	-0.0499173	0.0161627	0.126775	0.115869	0.312097	0.194897	0.0217984	-0.0603353	-0.0128371
[L].lLVQGGNAAPSAADIkAVVESVGAEVDEAR.[I]	P02400	RPP2B	0.215717	0.23054	0.0825385	0.0748988	0.134557	0.00856674	0.132768	0.995624	-0.155013	0.0739762								>3 sigma
[Y].lLLVQGGNAAPSAADIkAVVESVGAEVDEAR.[I]	P02400	RPP2B	0.198223	#N/A	0.163627	#N/A	0.0156848	#N/A	0.146848	#N/A	-0.219296	#N/A		#N/A		#N/A		#N/A		#N/A		#N/A
[E].iIAEGQkk.[F]	P02400	RPP2B	-0.174973	#N/A	-0.0851136	#N/A	0.0551372	#N/A	0.268929	#N/A	0.198071	#N/A		#N/A		#N/A		#N/A		#N/A		#N/A
[K].fATVPTGGASS.[A]	P02400	RPP2B	0.156601	#N/A	-0.0924146	#N/A	0.216389	#N/A	0.320687	#N/A	-0.112169	#N/A		#N/A		#N/A		#N/A		#N/A		#N/A
[K].fATVPTGGASSAAAGAAG.[A]	P02400	RPP2B	0.651872	#N/A	-0.249533	#N/A	0.442104	#N/A	-0.0823536	#N/A	-0.471402	#N/A		#N/A		#N/A		#N/A		#N/A		#N/A
[K].fATVPTGGASSA.[A]	P02400	RPP2B	-0.149293	#N/A	0.0767844	#N/A	0.110763	#N/A	0.0447337	#N/A	-0.140929	#N/A		#N/A		#N/A		#N/A		#N/A		#N/A
[R].iSPkILDEFYDR.[A]	P16140	VMA2	0.0862226	0.377279	0.073413	0.0651743	0.0983693	-0.00877593	0.13601	0.070071	-0.119939	0.236735
[V].fAEDYLDInGSPINPYAR.[I]	P16140	VMA2	0.174594	-0.388516	0.138659	-0.00976198	0.152967	0.0934501	0.415538	0.146168	-0.00117771	-0.265592
[R].lMkSAIGEGMTR.[K]	P16140	VMA2	0.162634	0.324964	-0.0222644	-0.164617	0.0160211	0.130908	0.142652	0.0629335	-0.0770141	0.241033
[E].iVNLTLPDGTVR.[Q]	P16140	VMA2	0.197027	-0.0286712	-0.00937043	-0.123613	0.0462622	-0.0203222	0.0396452	0.000176538	-0.0802455	-0.0492195
[K].iLDEFYDR.[A]	P16140	VMA2	0.0221152	0.235258	-0.0119011	-0.1023	0.259619	0.0836009	0.325445	0.0635146	-0.21306	0.049415
[A].lTTAEYLAYQTER.[H]	P16140	VMA2	0.245842	0.0577899	-0.0570636	-0.0951562	-0.141097	0.227346	0.21684	-0.0370952	-0.369671	-0.195138
[K].vFAEDYLDInGSPINPYAR.[I]	P16140	VMA2	0.619666	#N/A	0.0639061	#N/A	0.138182	#N/A	0.115148	#N/A	-0.0696408	#N/A		#N/A		#N/A		#N/A		#N/A		#N/A
[F].iTQGAYEDR.[T]	P16140	VMA2	0.202649	0.203653	-0.143655	-0.0678757	0.228954	0.0758633	0.26381	0.0830368	-0.315026	0.135363
[T].vSGVnGPLVILEkVkFPR.[Y]	P16140	VMA2	0.502989	1.05888	-0.293589	-0.107273	0.0113927	0.492402	0.355258	0.191429	-0.402943	-0.6469		>3 sigma
[R].iYPEEMISTGVSAIDTMNS.[I]	P16140	VMA2	-0.273397	#N/A	1.56071	#N/A	0.328738	#N/A	0.326867	#N/A	-0.00570853	#N/A		#N/A	>3 sigma	#N/A		#N/A		#N/A		#N/A
[G].vnGPLVILEkVkFPR.[Y]	P16140	VMA2	-0.020717	0.19332	-0.0647417	-0.300853	0.290784	-0.278259	0.0344544	-0.862844	-0.625882	0.425037								<-3 sigma
[A].aMGVNLETAR.[F]	P16140	VMA2	0.353529	-0.31876	0.00214646	-0.353882	0.152331	-0.0409256	0.143526	-0.0307728	-0.1646	0.0735037
[R].lALTTAEYLAYQTER.[H]	P16140	VMA2	1.7733	#N/A	0.808901	#N/A	-0.333691	#N/A	0.13807	#N/A	0.109035	#N/A	>3 sigma	#N/A		#N/A		#N/A		#N/A		#N/A
[N].lANDPTIER.[I]	P16140	VMA2	0.275797	0.33094	-0.0178938	-0.0826559	0.0412468	-0.0232859	0.174379	0.0959568	-0.123088	0.0537897
[T].iLTDMSSYADALR.[E]	P16140	VMA2	-0.112509	#N/A	-0.0132382	#N/A	-0.240794	#N/A	0.12565	#N/A	-0.120743	#N/A		#N/A		#N/A		#N/A		#N/A		#N/A
[N].lTLPDGTVR.[Q]	P16140	VMA2	0.0776698	0.199002	-0.0333508	0.0160239	0.12655	0.027498	0.062332	-0.00929487	-0.194115	0.163824
[A].iVQVFEGTSGIDVkkTTVEFTGESLR.[I]	P16140	VMA2	0.357385	-0.305439	-0.0244874	0.0752351	0.109515	-0.0315357	0.121921	-0.0195958	-0.195508	-0.39112
[L].mkSAIGEGMTR.[K]	P16140	VMA2	0.0688074	#N/A	0.0501197	#N/A	0.11276	#N/A	0.144145	#N/A	-0.340892	#N/A		#N/A		#N/A		#N/A		#N/A		#N/A
[R].iYPkEMLNR.[I]	P16140	VMA2	-0.29022	0.291123	-0.0431457	0.126637	0.250884	-0.102745	0.277267	0.0774613	-0.00413608	0.0257273
[S].aIGEGMTR.[K]	P16140	VMA2	0.0537309	-0.0515205	-0.00792495	-0.0302294	0.139294	0.11217	0.13792	0.0737803	-0.0634267	0.142544
[G].vNLETAR.[F]	P16140	VMA2	0.0648174	0.280795	-0.0665785	0.0218632	-0.000669516	0.03115	0.203464	0.0750886	-0.0804199	0.116673
[R].iYPEEMISTGVSA.[I]	P16140	VMA2	0.27785	#N/A	-0.0840724	#N/A	-0.0792128	#N/A	0.237501	#N/A	-0.224535	#N/A		#N/A		#N/A		#N/A		#N/A		#N/A
[R].lALTTAEY.[L]	P16140	VMA2	0.0270435	0	0.136874	-1.6475	-0.142216	0.684429	0.104266	-0.281048	-0.237805	0.652881				<-3 sigma
[E].fTGESLR.[I]	P16140	VMA2	0.112693	0.108117	-0.00748122	0.0874172	0.105502	0.148397	0.186212	-0.0721449	-0.0830154	0.0430282
[R].lVGIPAkR.[Q]	P0CS90	SSC1	0.0322247	0.434646	-0.0419051	-0.0281632	-0.0714656	-0.0473155	0.230588	0.075999	-0.217781	0.139141
[T].lTAPLVkR.[T]	P0CS90	SSC1	0.532483	0.626319	0.179479	0.101937	-1.13875e-05	0.0283914	0.0997162	0.213559	-0.151897	0.268159
[R].fkTETGIDLENDR.[M]	P0CS90	SSC1	0.0682979	0.421821	-0.0827645	-0.19645	0.10825	0.0384209	0.285656	0.237485	-0.172081	0.059812
[Y].lGkPVknAVVTVPAYFnDSQR.[Q]	P0CS90	SSC1	0.27022	0.19846	-0.0011331	0.00618781	-0.0504963	-0.0699035	0.0347037	0.320905	-0.238959	0.0059742
[A].vAIMEGkVPkIIENAEGSR.[T]	P0CS90	SSC1	0.185126	0.899453	0.186294	-0.0235217	0.00914169	0.098857	0.221529	0.202583	-0.207111	0.172138
[S].aVAIMEGkVPkIIENAEGSR.[T]	P0CS90	SSC1	-0.0465149	0.409873	0.0168847	-0.13837	0.0516762	-0.0347876	0.243547	0.105655	-0.146587	0.0985999
[S].iTVAGSSGLSENEIEQMVNDAEkFkSQDEAR.[K]	P0CS90	SSC1	0.230752	#N/A	-0.260752	#N/A	0.452744	#N/A	0.453544	#N/A	0.234174	#N/A		#N/A		#N/A		#N/A		#N/A		#N/A
[T].aAAGQTSVEIR.[V]	P0CS90	SSC1	0.236934	0.384161	-0.0847619	-0.145841	0.0418215	0.160539	0.22043	0.157553	-0.0813175	0.187596
[K].iVkHSnGDAWVEAR.[NG]	P0CS90	SSC1	0.135477	0.181257	0.0195554	0.0353732	0.00332473	0.194305	0.216499	-0.0171115	-0.135004	-0.139616
[A].aAGQTSVEIR.[V]	P0CS90	SSC1	0.143098	0.210492	0.0449891	-0.172075	0.0527061	0.0078515	0.138588	0.272166	-0.260184	0.421501
[A].iMEGkVPkIIENAEGSR.[T]	P0CS90	SSC1	-0.108834	-0.159801	0.02929	0.0810197	0.309192	0.167497	0.298396	-0.0591216	0.0740835	0.00943672
[T].lGGVFTR.[L]	P0CS90	SSC1	-0.0734365	0.0896229	-0.099394	-0.0325444	0.152301	-0.032709	0.105553	0.0811936	-0.0288683	0.152871
[Q].iVGLNVLR.[V]	P0CS90	SSC1	-0.208927	-0.268125	0.0831481	-0.71824	0.0782926	-0.367438	0.112825	0.204724	-0.272856	-0.0948356
[K].aLkDAGLSTSDISEVL.[L]	P0CS90	SSC1	0.205986	0.920543	0.0296136	0.296045	0.0792394	-0.221154	0.153052	-0.0982669	-0.316697	0.115778
[T].lSEGNEILkk.[I]	P50095	IMD3	0.0141046	#N/A	-0.0318088	#N/A	0.160635	#N/A	0.1875	#N/A	-0.0268482	#N/A		#N/A		#N/A		#N/A		#N/A		#N/A
[N].lIAAGADGLR.[I]	P50095	IMD3	0.02018	0.22627	0.084993	-0.0225036	0.0596351	0.0316903	0.21101	0.101858	-0.0555817	0.116153
[G].fSGFPVTEDGkRnGk.[L]	P50095	IMD3	0.0848643	0.492075	0.107566	-0.0110733	0.154959	-0.0153568	0.0489473	0.120611	-0.318104	-0.149781
[G].fSGFPVTEDGkR.[N]	P50095	IMD3	0.0421455	0.169135	0.0900215	-0.0425684	0.108444	0.0340608	0.240166	0.0160261	-0.250159	0.114014
[M].lAGTTESPGEYFYQDGkR.[L]	P50095	IMD3	0.0643357	0.443761	0.229135	-0.224019	0.0682487	-0.0120936	0.119269	0.079744	-0.132051	-0.0762327
[G].vSGAVVDkGSIkk.[F]	P50095	IMD3	0.124341	0.272946	-0.0620134	0.00466589	0.146288	0.20917	0.262285	0.199605	-0.0421394	0.126349
[F].iNNPIVISPTTTVGEAkSMkER.[F]	P50095	IMD3	0.194058	0.221847	-0.0345136	0.282378	0.138979	0.0519937	0.120793	-0.0550315	-0.366197	0.0175237
[K].ikkGkLLIVDDnGNLVSM.[L]	P50095	IMD3	0.427803	0.122474	-0.0744271	-0.0403091	0.244396	0.346169	0.284908	0.0940651	0.047718	-0.0159477
[G].lVDFPSSEVSLQTk.[L]	P50095	IMD3	-0.106419	0.629927	0.0219679	-0.0736527	0.188131	0.0108027	0.158458	0.0277879	-0.230933	0.027173
[R].lDGLSVQELMDSkTR.[G]	P50095	IMD3	-0.0287032	#N/A	-0.126324	#N/A	-0.0149909	#N/A	0.207673	#N/A	-0.0573264	#N/A		#N/A		#N/A		#N/A		#N/A		#N/A
[P].iVISPTTTVGEAkSMkER.[F]	P50095	IMD3	-0.00838028	0.349608	-0.00462401	-0.0494803	0.225768	0.175342	0.223294	-0.046246	-0.311384	-0.0235198
[G].iTLSEGNEILkk.[I]	P50095	IMD3	-0.024704	0.390919	-0.176858	-0.0527681	0.22625	0.0659147	0.179227	0.0632692	-0.171343	-0.19273
[G].fINNPIVISPTTTVGEAkSMkER.[F]	P50095	IMD3	0.0674512	-0.300846	0.812345	0.144498	-0.0839774	-0.0571423	0.0924797	0.149522	-0.318137	0.392278
[W].ikETFPDLEIIAGNVATR.[E]	P50095	IMD3	0.14412	0.26568	0.239795	0.189415	0.0911387	-0.0210995	0.223086	0.336747	-0.225488	0.156574
[T].lLkENVQSGkVR.[F]	P50095	IMD3	0.0011117	0.179913	-0.0550374	0.0530601	0.102145	0.0815871	0.211733	0.20445	-0.231636	0.0287933
[G].lSVQELMDSkTR.[G]	P50095	IMD3	0.124248	-0.131807	0.0271035	-0.208719	0.0646987	0.0458688	0.181128	0.0153991	-0.183633	0.175463
[N].lHSYEkR.[L]	P50095	IMD3	0.150375	0.302104	-0.00411386	-0.117698	0.0560631	0.0272802	0.177635	0.176883	-0.124623	0.113946
[S].iDAMQkTGTkGnASTSR.[Y]	P50095	IMD3	-0.0814721	0.0472569	-0.147591	-0.303932	0.224013	0.12609	0.23764	0.103487	-0.238177	-0.0891841
[S].vVPSASSLVITALkEPPRDR.[K]	P0CX54	RPL12B	-0.0603102	0	0.0286545	0	0.274178	-0.751504	0.114247	-0.363238	-0.280735	1.1829										>3 sigma
[D].fkNPHDIIEGINAGEIEIPEN.[-]	P0CX54	RPL12B	0.522929	0	0.144024	0.0065377	0.077585	0.290947	0.126803	-0.0161662	-0.099563	-0.14555
[S].lVITALkEPPRDR.[K]	P0CX54	RPL12B	-0.123296	0.405237	0.096196	-0.281435	-0.0220203	-0.111481	0.113276	0.080469	-0.171739	0.13976
[E].iLGTAQSVGcR.[V]	P0CX54	RPL12B	0.0449653	0.234037	0.330357	-0.0284674	-0.0614582	-0.147242	-0.161069	-0.129841	-0.143783	0.253019
[Q].aAASVVPSASSLVITALkEPPRDR.[K]	P0CX54	RPL12B	0.513584	0.24848	0.188416	-0.185128	-0.0595079	-0.00960747	0.413121	0.212494	-0.116649	-0.800073
[L].vITALkEPPRDR.[K]	P0CX54	RPL12B	0.620511	0.269087	-0.16277	-0.199164	0.109049	-0.231985	0.0778249	-0.228159	-0.301788	-0.118674
[A].aASVVPSASSLVITALkEPPRDR.[K]	P0CX54	RPL12B	0.298947	0.857857	0.389003	-0.521041	0.223821	-0.185844	0.225351	-0.0463462	-0.293239	0.189023
[A].lAPkIGPLGLSPkk.[V]	P0CX54	RPL12B	-0.0162863	0.211359	-0.00170021	0.26042	0.188351	0.0687677	0.259187	0.418143	-0.287406	-0.490745
[S].vTkEILGTAQSVGcR.[V]	P0CX54	RPL12B	0.246311	0.244781	-0.0949989	0.0603265	-0.00576765	0.00982269	0.0141955	-0.11276	-0.239083	0.123367
[N].vkHSGNIQLDEIIEIAR.[Q]	P0CX54	RPL12B	-0.00437214	0.983502	0.133976	0	0.269116	-0.601845	0.137902	0.251979	-0.0298748	-1.84862		>3 sigma								<-3 sigma
[G].ikVTVQLk.[I]	P0CX54	RPL12B	0.532606	#N/A	0.0236631	#N/A	0.228339	#N/A	0.163361	#N/A	-0.308842	#N/A		#N/A		#N/A		#N/A		#N/A		#N/A
[G].iNAGEIEIPEN.[-]	P0CX54	RPL12B	0.187706	0.0977656	-0.0252957	-0.202617	0.243281	0.0174018	0.218231	-0.0089671	-0.299169	-0.0556138
[T].lASVTkEILGTAQSVGcR.[V]	P0CX54	RPL12B	0.286605	#N/A	0.447665	#N/A	-0.173158	#N/A	0.107986	#N/A	-0.472305	#N/A		#N/A		#N/A		#N/A		#N/A		#N/A
[D].iIEGINAGEIEIPEN.[-]	P0CX54	RPL12B	0.452191	#N/A	-0.152902	#N/A	-0.201054	#N/A	0.371894	#N/A	-0.00736297	#N/A		#N/A		#N/A		#N/A		#N/A		#N/A
[A].lAPkIGPLGLSPkkVGEDIAk.[A]	P0CX54	RPL12B	-0.912946	-0.506271	-0.359211	0.160973	0.0325602	0.194691	0.535867	0.466119	-0.0698426	-0.169133	<-3 sigma
[R].aVGGEVGASAA.[L]	P0CX54	RPL12B	0.359854	0.29206	-0.0687618	0.046234	0.186473	-0.00215857	0.29054	0.110212	-0.00210731	-0.0115729
[T].aLkEPPRDR.[K]	P0CX54	RPL12B	0.296778	0.286449	0.0703355	-0.202281	-0.116053	0.0823322	0.350781	0.197362	-0.146037	-0.00321613
[S].lVITALkEPPR.[D]	P0CX54	RPL12B	-0.376881	1.02292	-0.00763382	-0.0698905	-0.215961	0.194407	0.0812285	-0.0160459	0.0690883	0.179504		>3 sigma
[S].lGLNIDEDEETETAPEASTAAPVEEVPADTEMEEVD.[-]	P02829	HSP82	0	#N/A	0	#N/A	0	#N/A	-0.0388467	#N/A	0.114496	#N/A		#N/A		#N/A		#N/A		#N/A		#N/A
[K].vkEEVQEIEELNkTkP.[L]	P02829	HSP82	0.116125	0.100167	-0.231431	0.0838789	0.0313697	-0.00800739	0.371857	0.196135	-0.0393193	-0.0138861
[A].lkEILGDQVEkVVVSYk.[L]	P02829	HSP82	0.192001	#N/A	-0.0982015	#N/A	0.167837	#N/A	0.184787	#N/A	-0.0217604	#N/A		#N/A		#N/A		#N/A		#N/A		#N/A
[L].lTSGFSLDEPTSFASR.[I]	P02829	HSP82	-0.388291	0.551585	-0.0271343	0.284202	0.0630339	0.150003	0.38949	0.270845	-0.113548	0.0431825
[K].lLYETAL.[L]	P02829	HSP82	0	0	0	-0.773306	-0.315468	-0.340589	-1.22109	-0.0758231	0.434123	0							<-3 sigma
[K].vkEEVQEIEELNkTkPLWTR.[N]	P02829	HSP82	0.444588	#N/A	0.282396	#N/A	-0.22188	#N/A	0.319836	#N/A	0.557276	#N/A		#N/A		#N/A		#N/A		#N/A		#N/A
[R].lAASVVGVGkR.[K]	P0CX82	RPL19A	0.326311	-0.00117281	0.199021	0.0238665	-0.34049	-0.0653635	0.0239035	0.161391	-0.119969	0.350205
[K].lVknGTIVkk.[A]	P0CX82	RPL19A	0.156812	0.154332	-0.136609	-0.0231457	0.291279	0.0968654	0.345698	0.155072	-0.188278	0.0539523
[A].lVEHIIQAkADAQR.[E]	P0CX82	RPL19A	0.301821	0.210449	0.08728	-0.10498	0.13374	0.0299264	0.209539	0.144146	-0.211723	0.0108743
[K].vWLDPnETSEIAQAnSR.[N]	P0CX82	RPL19A	0.417777	0.257847	-0.072034	0.0716016	0.269814	0.125028	0.167529	0.103523	-0.139595	-0.0712056
[K].lVknGTIVkkAVT.[V]	P0CX82	RPL19A	0.749536	#N/A	-0.272865	#N/A	0.105978	#N/A	0.286709	#N/A	-0.15097	#N/A		#N/A		#N/A		#N/A		#N/A		#N/A
[R].aLVEHIIQAkADAQR.[E]	P0CX82	RPL19A	0.137964	-0.00379335	0.0102887	-0.169609	0.0984922	-0.00498823	0.289483	-0.0930378	-0.329239	-0.0248195
[K].vWLDPNETSEIAQ.[A]	P0CX82	RPL19A	-0.169273	#N/A	0.411512	#N/A	-0.0107103	#N/A	0.166166	#N/A	-0.169674	#N/A		#N/A		#N/A		#N/A		#N/A		#N/A
[K].aLNEEAEAR.[R]	P0CX82	RPL19A	0.208501	0.0463338	0.0850795	0.00368741	0.0978009	0.0886414	0.222273	-0.115684	-0.00918277	0.143044
[A].lNEEAEAR.[R]	P0CX82	RPL19A	0.13785	0.0679188	-0.0117025	0.10431	0.195537	0.275151	0.296745	0.175903	-0.350531	0.20323
[L].aASVVGVGkR.[K]	P0CX82	RPL19A	0.011266	#N/A	0.366308	#N/A	-0.30156	#N/A	0.112021	#N/A	0.0550199	#N/A		#N/A		#N/A		#N/A		#N/A		#N/A
[W].lDPNETSEIAQAnSR.[N]	P0CX82	RPL19A	0.30286	0.394179	0.101432	-0.0108196	0.0620031	0.0660928	0.253398	0.0542031	-0.425458	0.0748888
[H].iIQAkADAQR.[E]	P0CX82	RPL19A	0.162167	0.191743	-0.0336351	-0.142241	0.227818	0.0339759	0.207813	0.00835182	-0.200247	0.39523
[Q].akADAQR.[E]	P0CX82	RPL19A	0.114426	0.167914	0.0389934	0.150863	0.420023	0.00319219	0.336886	-0.213804	0.0262062	-0.400372
[K].vWLDPNETSE.[I]	P0CX82	RPL19A	-0.0185064	0.0954835	-0.0826827	-0.119505	-0.0271277	-0.260865	0.358143	0.0918608	-0.271168	0.0732273
[E].iAQAnSR.[N]	P0CX82	RPL19A	0.161577	0.146347	-0.0376216	-0.0713674	0.142543	0.0274067	0.170113	-0.0485339	-0.18409	0.0763777
[A].lVEHIIQAk.[A]	P0CX82	RPL19A	0.210186	#N/A	-0.0993522	#N/A	0.136273	#N/A	0.0995662	#N/A	-0.178807	#N/A		#N/A		#N/A		#N/A		#N/A		#N/A
[K].lVknGTIVkkA.[V]	P0CX82	RPL19A	0.205091	0.33674	-0.127006	-0.0775805	0.259738	0.121683	0.325128	0.102609	-0.208147	0.163882
[R].aHAQSkR.[E]	P0CX82	RPL19A	0.292648	0.0484103	0.0396324	-0.0189908	-0.304603	0.0199018	0.292303	-0.245377	-0.35353	0.49262
[K].lIPEVINkEIEN.[A]	P33442	RPS1A	0.0667428	0.336616	-0.0564068	0.235328	0.0671641	-0.173176	0.296583	-0.00123636	-0.474381	-0.230528
[C].lADLQGSEDHSFR.[K]	P33442	RPS1A	0.268318	0.107498	-0.0891488	0.0337008	0.0910261	-0.0799869	0.275198	0.0555648	-0.0285689	0.143044
[K].lIPEVINkEIEnATkD.[I]	P33442	RPS1A	-0.0461902	0.258396	-0.0809965	-0.0120295	0.0956306	0.0627658	0.203603	0.0573669	-0.158194	-0.0496142
[K].vTGFkDEVLETV.[-]	P33442	RPS1A	0.0910758	0.316433	-0.0865118	0.0151825	0.145167	-0.0269637	0.0670693	0.0935415	-0.0731381	-0.134772
[D].iFPLQNIHVR.[K]	P33442	RPS1A	0	0	-0.531102	0	0	0	-0.182075	0	0.148399	0
[N].lLTNFHGMDFTTDkLR.[S]	P33442	RPS1A	0.488333	#N/A	0.584456	#N/A	0.0323258	#N/A	0.371374	#N/A	0.0241688	#N/A		#N/A		#N/A		#N/A		#N/A		#N/A
[K].vISEILTkEVQGSTLAQ.[L]	P33442	RPS1A	0.169301	#N/A	0.447725	#N/A	0.0263886	#N/A	-0.132583	#N/A	-0.117758	#N/A		#N/A		#N/A		#N/A		#N/A		#N/A
[D].lQGSEDHSFR.[K]	P33442	RPS1A	0.202083	0.0401591	0.0486939	-0.0567597	0.182421	0.114384	0.122506	-0.177799	0.0129879	-0.300406
[K].lIPEVInkEIENATkDIFPLQN.[I]	P33442	RPS1A	-0.237715	#N/A	-0.0417575	#N/A	-0.46713	#N/A	-0.0498423	#N/A	-0.453847	#N/A		#N/A		#N/A		#N/A		#N/A		#N/A
[K].lIPEVINkEIEnATkDIFP.[L]	P33442	RPS1A	0.253765	0.374151	-0.0158304	0.011531	0.144267	-0.0648014	0.181828	0.197475	-0.180108	-0.606643
[A].lHGEGSGEEkGkk.[V]	P33442	RPS1A	0.237757	-0.0134552	-0.223322	-0.122005	0.164632	0.122624	0.344639	0.0515989	-0.150015	0.119561
[K].vISEILTkEVQGST.[L]	P33442	RPS1A	0.269703	0.0778574	-0.0283967	-0.0849293	0.111591	-0.0842348	0.254826	-0.0387133	-0.325306	-0.594304
[G].lkSASDALkGR.[V]	P33442	RPS1A	0.32442	0.184817	-0.130841	-0.0697664	0.112524	0.138911	0.368935	0.140956	-0.160999	0.117432
[D].ikAPSTFENR.[N]	P33442	RPS1A	0.155017	0.203913	-0.084889	-0.0581066	0.0802922	0.0425493	0.215927	0.0696039	-0.198352	0.0355574
[SN].aSDALkGR.[V]	P33442	RPS1A	0.162714	0.0892175	0.083706	-0.059952	0.142607	0.0685972	0.0284542	-0.207334	-0.230736	0.865666
[K].lIPEVINkE.[I]	P33442	RPS1A	-0.236914	0.196951	-0.118401	-0.116229	0.117249	0.154832	0.28194	0.250298	-0.0903953	0.124481
[K].vISEILTkE.[V]	P33442	RPS1A	-0.0931732	0.28363	-0.0672853	-0.0745192	0.130379	-0.048867	0.0686482	0.0680528	-0.131874	0.0740128
[T].lAQLTSk.[L]	P33442	RPS1A	0.439097	0.261521	0.149611	0.0956172	0.0430596	0.156985	0.195822	-0.00748528	-0.21672	0.114942
[H].gEGSGEEkGk.[K]	P33442	RPS1A	0.305863	0.32913	0.102948	0.0279805	0.29393	0.263917	0.325528	0.315291	-0.00321602	0.378426
[TS].gFkDEVLETV.[-]	P33442	RPS1A	-0.085098	#N/A	-0.0334065	#N/A	0.24471	#N/A	0.0857301	#N/A	-0.11674	#N/A		#N/A		#N/A		#N/A		#N/A		#N/A
[RK].vVDPFTR.[K]	P33442	RPS1A	0.178262	0.0753118	-0.0294907	6.04984e-05	0.235551	0.0652826	0.30485	0.0204709	-0.120013	-0.00747701
[G].fkDEVLETV.[-]	P33442	RPS1A	-0.0277193	0.126809	-0.100468	-0.0557123	0.219613	0.109635	0.325021	0.0595413	-0.10009	-0.0156763
[P].lQNIHVR.[K]	P33442	RPS1A	-0.261612	0.064714	0.077239	-0.152258	0.0453714	0.0360651	0.00230103	0.0515533	0.176425	0.297449
[D].fTTDkLR.[S]	P33442	RPS1A	0.675492	0.0103932	-0.11514	-0.19837	-0.00419016	-0.16197	-0.0828685	-0.0527518	0.0686024	0.382124
[T].lVNkSTGLkSASDALkGR.[V]	P33442	RPS1A	0.57606	0.492042	-0.011701	-0.190776	0.160757	0.0179103	0.302338	0.106825	-0.227697	-0.0236848
[A].iAVMTSGGDAPGMnSNVR.[A]	P16862	PFK2	-0.672117	0.417684	-0.0968189	-0.0636351	0.0802601	0.311484	0.091866	-0.0207796	-0.294109	-0.150045
[R].mkTTDTYPSLPkP.[L]	P16862	PFK2	0.0963431	0.275559	-0.126976	-0.241188	0.103293	0.0873918	0.229531	0.120932	-0.162196	-0.139123
[N].aVSTkPTPPPAPEASAESGLSSk.[V]	P16862	PFK2	0.0826355	#N/A	-0.179267	#N/A	0.22335	#N/A	0.0265099	#N/A	0.198859	#N/A		#N/A		#N/A		#N/A		#N/A		#N/A
[K].aAIDFYTkF.[L]	P16862	PFK2	0.06048	#N/A	-0.0535287	#N/A	0.156184	#N/A	0.0725409	#N/A	0.088088	#N/A		#N/A		#N/A		#N/A		#N/A		#N/A
[R].lIADHLVGR.[K]	P16862	PFK2	0.0607838	0.14898	-0.0428096	0.0059569	0.0162544	-0.18158	0.105333	0.0485595	-0.092067	0.0460542
[L].iAVnENkIVR.[K]	P16862	PFK2	0.250992	0.166538	-0.00771734	-0.0247101	0.176071	0.165988	0.211828	0.101904	-0.304787	0.0679533
[K].lAEVITAEADGRFDAkPAYPGHVQQGGLPSPIDR.[T]	P16862	PFK2	-0.0614693	0	0.59018	-0.144963	-0.0546291	0.0160197	0.217512	0.461391	0.0109247	0.429804
[K].lTkAVAEAIQAkD.[F]	P16862	PFK2	0.289678	0.180242	0.0750978	0.00292746	0.169172	0.138463	0.17132	0.248154	-0.184858	-0.189298
[K].lAEVITAEADGR.[F]	P16862	PFK2	0.121574	0	0.0602977	-0.784278	0.0821582	0.326481	0.192212	-1.06888	-0.153098	1.19922								<-3 sigma		>3 sigma
[A].lSATkLAEVITAEADGR.[F]	P16862	PFK2	0.754123	0.187804	0.0426698	-0.266324	0.0374087	-0.0427582	0.113914	0.333278	-0.165287	0.188017
[K].lTkAVAEAIQAkDFkR.[A]	P16862	PFK2	-0.305185	-0.0220272	-0.980713	0.237956	0.0104493	-0.0613038	0.335282	-0.0105146	-0.536291	0.27442			<-3 sigma
[P].lIAVNENk.[I]	P16862	PFK2	-0.00670927	#N/A	-0.102336	#N/A	0.0549062	#N/A	0.168737	#N/A	-0.111651	#N/A		#N/A		#N/A		#N/A		#N/A		#N/A
[S].lIEELLkTNR.[I]	P16862	PFK2	0.229615	0.0709823	0.127664	0.422186	0.248502	0.287631	0.591165	-0.112433	0.0830683	0.400804
[Q].lYDYETEVSMR.[M]	P16862	PFK2	0.689748	0.158026	-0.0596594	0.0912925	0.145239	0.131534	0.219857	0.0868709	-0.200945	-0.021372
[E].fHWEDVR.[G]	P16862	PFK2	0.154189	0.711525	-0.137595	-0.177628	0.330176	0.218581	0.305868	-0.23779	0.342661	0
[LC].iAVNENk.[IV]	P16862	PFK2	-0.0746173	#N/A	-0.0622111	#N/A	0.176839	#N/A	0.214451	#N/A	-0.123966	#N/A		#N/A		#N/A		#N/A		#N/A		#N/A
[S].lNWkDMLGWQSR.[G]	P16862	PFK2	0.114417	0.0121283	0.0861124	-0.127847	0.0975087	-0.360106	-0.0267747	0.203836	-0.222996	0.356636
[L].lRPDEk.[I]	P16862	PFK2	-0.112743	#N/A	-0.0842206	#N/A	-0.193774	#N/A	0.327814	#N/A	0.269513	#N/A		#N/A		#N/A		#N/A		#N/A		#N/A
[K].vSGFkDEVLETV.[-]	P23248	RPS1B	0.0209534	0.174151	-0.217022	-0.0619048	0.168741	0.0175502	0.236301	-0.126314	-0.209535	0.150659
[T].lVNkSTGLknASDALkGR.[V]	P23248	RPS1B	0.274715	0.304477	-0.117391	-0.17986	0.146359	0.00719064	0.304066	0.199825	-0.200628	0.0229258
[K].vISEILTR.[E]	P23248	RPS1B	0.144285	0.18103	0.23594	0.181499	-0.000755927	-0.0456219	0.0586354	0.0767818	-0.143177	-0.128009
[G].lknASDALkGR.[V]	P23248	RPS1B	0.227095	0.158906	-0.119412	-0.152444	0.131032	0.119767	0.320964	0.152569	-0.172191	-0.051744
[K].lAFTGSTEVGkS.[V]	P54115	ALD6	0.476333	0.256836	-0.0604426	-0.0396343	0.231718	-0.0571662	0.143956	0.0594236	-0.174466	0.106001
[K].iTLELGGkSAH.[L]	P54115	ALD6	0.0164995	#N/A	0.1274	#N/A	0.199437	#N/A	0.276301	#N/A	-0.117291	#N/A		#N/A		#N/A		#N/A		#N/A		#N/A
[R].iVkEEIFGPVVT.[V]	P46367	ALD4	0.249661	0.200441	0.0785235	0.101624	0.0625617	0.00864508	0.171067	0.0411273	-0.0346012	0.0417693
[K].iTLELGGkSAHL.[V]	P54115	ALD6	0.0381634	#N/A	0.401927	#N/A	0.018788	#N/A	-0.00428513	#N/A	-0.347542	#N/A		#N/A		#N/A		#N/A		#N/A		#N/A
[M].lkAGTVWINTYnDFDSR.[V]	P54115	ALD6	0.302692	0.487857	0.0852306	-0.196174	0.0814722	0.249265	0.150693	0.230204	-0.181086	-0.133484
[G].lGSGIETESLSTGLk.[V]	P54115	ALD6	-0.142571	0.702015	0.110536	-0.14443	0.0991372	-0.0108648	0.227819	-0.279571	-0.0682645	-0.0596126
[K].lHFDTAEPVkITLPnG.[L]	P54115	ALD6	0.291858	0.41917	0.0384569	-0.00905008	0.14265	0.00976163	0.143118	0.189139	-0.193077	-0.00504385
[F].iRPTVFYDVNEDMR.[I]	P54115	ALD6	0.204045	0.425351	0.125412	-0.378124	-0.0321734	0.0425685	0.0838514	0.181694	-0.230334	-0.0236511
[T].vFYDVNEDMR.[I]	P54115	ALD6	0.0034833	0.143986	0.00576234	-0.0714224	0.160809	0.0956831	0.214125	0.0713818	-0.143347	-0.0291183
[G].lTYEQPTGLFInNk.[F]	P54115	ALD6	0.412108	#N/A	0.229947	#N/A	-0.047574	#N/A	0.368054	#N/A	-0.0946196	#N/A		#N/A		#N/A		#N/A		#N/A		#N/A
[K].lAFTGSTEVGkSVAVDSSESNLkk.[I]	P54115	ALD6	-1.11998	0.495166	-0.253266	0.0156018	0.290265	0.315062	0.38722	0.176555	-0.637091	-0.00434055	<-3 sigma
[W].iNTYnDFDSR.[V]	P54115	ALD6	-0.169688	0.349889	-0.0319486	-0.0555526	0.178098	0.130222	0.273925	0.0326784	-0.342636	-0.0543412
[S].vAVDSSESNLkk.[I]	P54115	ALD6	0.152632	0.203657	-0.135028	-0.0556712	0.160323	0.0782422	0.270954	0.0349485	-0.0977329	-0.165292
[K].iTLELGGkS.[A]	P54115	ALD6	0.0360033	#N/A	-0.183551	#N/A	0.382095	#N/A	0.1927	#N/A	-0.443078	#N/A		#N/A		#N/A		#N/A		#N/A		#N/A
[Y].fIRPTVFYDVNEDMR.[I]	P54115	ALD6	0.0976359	#N/A	0.0733175	#N/A	0.198397	#N/A	0.0116805	#N/A	-0.00387494	#N/A		#N/A		#N/A		#N/A		#N/A		#N/A
[K].fkTLEEGVEMANSSEFG.[L]	P54115	ALD6	-0.0256022	#N/A	-0.0532908	#N/A	0.0266958	#N/A	0.261866	#N/A	-0.0968233	#N/A		#N/A		#N/A		#N/A		#N/A		#N/A
[G].vVNIVPGPGR.[T]	P54115	ALD6	0.00193546	0.439978	0.0131667	0.143913	-0.0301421	0.0793954	0.0952786	0.112721	-0.0684049	0.144052
[N].fQGAITNR.[Q]	P54115	ALD6	0.216027	0.144146	0.00822624	-0.0268406	0.175867	-0.00870956	0.0873748	-0.163535	-0.165733	0.135257
[K].iAPALAMGnVcILkPAAVTPLNA.[L]	P54115	ALD6	-0.603477	#N/A	0.170239	#N/A	0.0110683	#N/A	0.310909	#N/A	-0.674526	#N/A		#N/A		#N/A		#N/A		#N/A		#N/A
[R].aFHDTEWATQDPR.[E]	P54115	ALD6	0	#N/A	0.353913	#N/A	-1.40201	#N/A	1.21284	#N/A	0.50266	#N/A		#N/A		#N/A	<-3 sigma	#N/A	>3 sigma	#N/A		#N/A
[P].lSVINVSAQR.[D]	P02407	RPS17A	0.086538	0.256938	-0.0466577	-0.106707	0.0682511	0.11211	0.18498	0.0304836	-0.160238	0.0873255
[G].iSFkLQEEER.[E]	P02407	RPS17A	0.218604	0.250507	-0.107995	-0.0948223	0.0635145	-0.0259589	0.0390781	0.045042	-0.17982	0.114263
[K].lTLDFQTNkR.[L]	P02407	RPS17A	0.301438	0.17825	0.000131681	-0.174696	0.0988787	0.030794	0.228335	0.122602	-0.210944	0.0866811
[G].iSFkLQEEERER.[K]	P02407	RPS17A	0.488453	0.329669	-0.0374809	-0.144461	0.0641074	0.0805824	0.0638619	0.0912349	-0.252584	0.0409279
[R].lcDEIATIQSkR.[L]	P02407	RPS17A	0.0432969	#N/A	0.127074	#N/A	-0.295851	#N/A	0.103537	#N/A	-0.00522777	#N/A		#N/A		#N/A		#N/A		#N/A		#N/A
[S].lGLkLPLSVINVSAQR.[D]	P02407	RPS17A	0.49763	0.53758	-0.0985048	-0.0564593	0.0903142	-0.00736529	0.131519	0.0693661	-0.313244	0.0227953
[K].lQEEERER.[K]	P02407	RPS17A	0.211499	-0.0778731	-0.0653515	-0.225469	0.0601107	0.0530761	0.233885	0.091357	-0.0675998	-0.189527
[S].vInVSAQR.[D]	P02407	RPS17A	0.241942	0.138708	-0.0452089	-0.174508	0.132732	0.0566975	0.191748	0.0619936	-0.203931	0.163928
[E].vSALDLSR.[S]	P02407	RPS17A	0.235751	0.486894	0.0950523	-0.0700317	-0.0326609	0.142996	0.30891	-0.0324829	-0.116162	-0.14107
[T].lDFQTNkR.[L]	P02407	RPS17A	0.0534585	0.309253	-0.134458	-0.133514	0.0634405	0.0587762	0.22312	0.120939	-0.164158	0.104907
[K].lTLDFQTN.[K]	P02407	RPS17A	0.034649	-1.65059	-0.0341708	-0.815729	-0.275314	0.184452	0.292372	-0.00571233	-0.0683616	0.371139		<-3 sigma
[K].iAGYTTHL.[M]	P02407	RPS17A	0.437538	#N/A	0.198042	#N/A	0.183712	#N/A	0.249432	#N/A	-0.233259	#N/A		#N/A		#N/A		#N/A		#N/A		#N/A
[R].iQkGPVRG.[I]	P02407	RPS17A	0.161842	0.192485	-0.11608	-0.0788346	0.127203	0.153577	0.128486	0.145724	-0.368393	0.349009
[R].lcDEIAT.[I]	P02407	RPS17A	-0.256414	1.89383	-0.00210464	-1.10785	0.153496	0.0765382	0.115135	-0.359367	-0.241684	0		>3 sigma		<-3 sigma
[D].fQTnkR.[L]	P02407	RPS17A	0.370221	#N/A	-0.0680735	#N/A	0.14839	#N/A	0.323805	#N/A	0.00421558	#N/A		#N/A		#N/A		#N/A		#N/A		#N/A
[D].vAkPTGPkTAIDknGNITYSEEPR.[E]	P19097	FAS2	0.7007	#N/A	0.143464	#N/A	0.0312693	#N/A	0.166579	#N/A	-0.238621	#N/A		#N/A		#N/A		#N/A		#N/A		#N/A
[S].lGGGAALkDIEIVR.[V]	P19097	FAS2	0.117795	0.368646	0.118047	0.0666355	-0.0471035	0.0973959	0.117074	0.0954352	-0.121596	0.0529135
[S].iSHDDLQAVAVAVSTkk.[-]	P19097	FAS2	-0.465927	#N/A	0.169748	#N/A	0.176835	#N/A	0.203586	#N/A	-0.393574	#N/A		#N/A		#N/A		#N/A		#N/A		#N/A
[F].vSkEHAPYTDELEEDVYLDPLAR.[V]	P19097	FAS2	-0.187303	0.707686	-0.0512111	-0.358292	0.323576	-0.175882	0.383404	-0.0596594	-0.0728633	-0.194868
[A].lGGPITkESQPTIEEDLTR.[V]	P19097	FAS2	0.234825	-0.371834	0.114188	0.430392	0.0679254	0.209123	0.129262	-0.179817	-0.0814887	-0.0910672
[Q].iAPAELEGLLDLER.[V]	P19097	FAS2	0	#N/A	0	#N/A	0.158406	#N/A	0.597654	#N/A	-0.308637	#N/A		#N/A		#N/A		#N/A		#N/A		#N/A
[A].vAVAVSTkk.[-]	P19097	FAS2	-0.0407389	0.124672	-0.0861663	-0.252211	0.160294	0.070289	0.244124	0.0821072	-0.00674489	0.198576
[K].lFVSkEHAPYTDELEEDVYLDPLAR.[V]	P19097	FAS2	-0.565316	#N/A	-0.269725	#N/A	-0.167233	#N/A	0.0496336	#N/A	-0.29227	#N/A		#N/A		#N/A		#N/A		#N/A		#N/A
[A].iSAQADkQDISSSTR.[V]	P19097	FAS2	0.251761	0.17146	-0.0490137	-0.0710313	0.151925	0.0996857	0.156463	-0.00171267	-0.135965	0.195719
[A].iDknGNITYSEEPR.[E]	P19097	FAS2	0.321055	0.426505	0.0145703	-0.0571353	0.0220497	0.0594905	0.16989	-0.0455183	-0.289555	0.0169226
[L].vALSNEPAAR.[L]	P19097	FAS2	-0.0608661	-0.110335	0.0423295	-0.495715	0.235454	0.0969835	0.205538	-0.103815	-0.123803	0.137309
[A].lkDIEIVR.[V]	P19097	FAS2	-0.0354784	0.176757	-0.141246	-0.0977788	0.255489	0.0884118	0.301307	0.13358	-0.0472784	0.00607417
[E].iHNEAESQLR.[A]	P19097	FAS2	0.459951	#N/A	-0.00712805	#N/A	-0.0885432	#N/A	-0.177443	#N/A	-0.00362343	#N/A		#N/A		#N/A		#N/A		#N/A		#N/A
[E].lVETSEVR.[K]	P19097	FAS2	0.201474	#N/A	0.0474441	#N/A	0.175631	#N/A	0.333025	#N/A	0.0266116	#N/A		#N/A		#N/A		#N/A		#N/A		#N/A
[Y].lkMDLDnGERk.[F]	P19097	FAS2	0.186023	#N/A	-0.124495	#N/A	0.236958	#N/A	0.347629	#N/A	0.019496	#N/A		#N/A		#N/A		#N/A		#N/A		#N/A
[K].lSQYVQEMA.[L]	P19097	FAS2	0.561465	#N/A	-0.412617	#N/A	0.342949	#N/A	0.475175	#N/A	-0.27219	#N/A		#N/A		#N/A		#N/A		#N/A		#N/A
[A].mAATATDkIGR.[S]	P19097	FAS2	0.426714	0.103112	0.552328	-0.0125144	0.361105	0.080568	0.0978042	0.0164057	-0.419174	-0.0147601
[A].vAVSTkk.[-]	P19097	FAS2	-0.0323069	0.140638	-0.157226	-0.00754491	0.170634	0.0812659	0.258987	0.111875	-0.19363	0.136043
[K].iGPDVVIGPNVTIGDGVR.[I]	P41940	PSA1	-0.226077	0.337506	0.0178315	0.176956	0.00747062	0.122996	0.153429	-0.10762	-0.051992	-0.156023
[G].lILVGGYGTR.[L]	P41940	PSA1	-0.33657	0.344909	-0.0231934	-0.0562381	0.165295	0.0700236	0.202518	0.0450964	-0.112674	0.149067
[T].fSVETEPLGTAGPLk.[L]	P41940	PSA1	0.154362	-0.051119	-0.0700564	0.117594	-0.00511554	0.0262659	0.259333	-0.0165649	-0.134765	-0.00846241
[N].iVGNALIDPTAkISSTAk.[I]	P41940	PSA1	0.0379846	0.116623	0.0705049	0.020294	0.0711464	0.0962593	0.00497636	0.00392489	-0.230894	-0.0067322
[S].iSDNVPkEAIIM.[-]	P41940	PSA1	-0.280114	0.0772124	-0.0862438	0.0130896	0.134868	0.103276	0.201939	0.0518515	-0.0816322	0.0658355
[N].iVGNALIDPTAk.[I]	P41940	PSA1	-0.185862	0.390058	-0.107876	0.259975	-0.0293106	-0.0828982	0.0989623	0.0527092	-0.166796	-0.0298431
[A].lIDPTAkISSTAk.[I]	P41940	PSA1	0.0330657	0.601286	-0.06242	-0.160868	0.116077	0.0278995	0.215144	0.179328	-0.0953615	-0.204183
[K].iSSTAkIGPDVVIGPNVTIGDGVR.[I]	P41940	PSA1	0.841314	-0.79719	0.19826	-0.6828	0.335217	-0.767657	0.0821766	-0.170195	-0.158215	0.170262
[Y].gVIVHDIATPNLIDR.[F]	P41940	PSA1	-0.112946	0.157614	0.105302	0.248788	0.113126	-0.204302	0.104722	-0.19092	-0.171944	0.018026
[T].iVGWnSTVGQWcR.[L]	P41940	PSA1	0.0420614	#N/A	0.07267	#N/A	0.192077	#N/A	0.106568	#N/A	-0.138904	#N/A		#N/A		#N/A		#N/A		#N/A		#N/A
[A].lIDPTAkISSTAkIGPDVVIGPNVTIGDGVR.[I]	P41940	PSA1	-0.575609	#N/A	-0.518733	#N/A	-0.228469	#N/A	0.221823	#N/A	-0.373264	#N/A		#N/A		#N/A		#N/A		#N/A		#N/A
[N].iTFSVETEPLGTAGPLk.[L]	P41940	PSA1	0.175587	0.268891	0.0692001	0.316957	0.18936	0.257531	0.261942	0.255162	-0.108227	-0.0709871
[K].iGPDVVIGPNVT.[I]	P41940	PSA1	0.188096	0.663409	-0.247071	-0.040643	0.0695776	0.14605	0.201713	0.266879	-0.0661551	0.146861
[K].iGPDVVIGPN.[V]	P41940	PSA1	-0.055209	-0.180032	-0.149386	-0.0625378	0.203823	0.249684	0.187667	0.0120006	-0.226955	-0.0602158
[D].iATPNLIDR.[F]	P41940	PSA1	0.191232	#N/A	-0.121133	#N/A	-0.265767	#N/A	0.0269031	#N/A	-0.0945291	#N/A		#N/A		#N/A		#N/A		#N/A		#N/A
[A].lIDPTAk.[I]	P41940	PSA1	-0.0037881	0.165528	-0.067736	-0.0661462	0.250303	0.0864267	0.183266	0.120202	-0.0421436	0.0678877
[T].iVATkVDEPSkYGVIVHDIATPnLIDR.[F]	P41940	PSA1	0.415647	0.894875	0.551948	0.0673392	0.0319334	-0.11947	0.287304	0.236038	-0.0974145	-0.229739
[K].lAEDVLkkDN.[S]	P41940	PSA1	-0.0559673	#N/A	-0.13846	#N/A	0.285331	#N/A	0.247396	#N/A	-0.0888053	#N/A		#N/A		#N/A		#N/A		#N/A		#N/A
[E].lADFHk.[A]	P41940	PSA1	-0.053324	0.213211	-0.121232	-0.08769	0.242192	0.0527479	0.282775	0.210476	-0.167574	0.241838
[F].vEkPkEFVGNR.[I]	P41940	PSA1	0.106761	#N/A	-0.0505382	#N/A	0.07361	#N/A	0.241506	#N/A	-0.1023	#N/A		#N/A		#N/A		#N/A		#N/A		#N/A
[K].lAEDVLkkDNSPF.[F]	P41940	PSA1	-0.139571	#N/A	-0.00625706	#N/A	0.222352	#N/A	0.169977	#N/A	-0.0528418	#N/A		#N/A		#N/A		#N/A		#N/A		#N/A
[T].lTAVHDkVLEDmVFPTEIVGkR.[V]	P48164	RPS7B	0.623758	1.26604	0.155229	-0.284024	0.0802394	-0.0943396	0.0328105	0.00127297	-0.217562	0.268839		>3 sigma
[K].iLSQAPSELELQ.[V]	P48164	RPS7B	0.186148	0.290177	0.234686	-0.705234	0.380655	-0.0800479	0.130781	-0.206127	-0.412947	-0.215781
[K].lTGkQIVFEIPSQTN.[-]	P48164	RPS7B	0.129897	0.586929	0.0803493	0.284945	0.000526731	0.0847632	0.163477	0.17581	-0.1698	-0.0096189
[A].vHDkVLEDMVFPTEIVGkR.[V]	P48164	RPS7B	0.24823	0.367566	-0.0234894	-0.0854229	0.198548	-0.0446326	0.240774	0.273498	-0.21821	-0.0555566
[T].aVHDkVLEDMVFPTEIVGkR.[V]	P48164	RPS7B	-0.640169	#N/A	0.21583	#N/A	0.0936632	#N/A	0.291676	#N/A	-0.288257	#N/A		#N/A		#N/A		#N/A		#N/A		#N/A
[A].lSAYHkVQTk.[L]	P48164	RPS7B	0.431573	0.260125	-0.164133	-0.138483	0.183123	0.063284	0.266933	0.0652019	-0.143749	0.105392
[Q].iVFEIPSQTN.[-]	P48164	RPS7B	0.107534	0.115204	0.112794	-0.128805	0.192514	0.0986564	0.172028	-0.0173866	-0.18923	-0.112502
[R].vTGGMkVkADRDESSPYAAM.[L]	P39516	RPS14B	0.247304	0.250022	-0.0441095	-0.147165	0.0653456	0.00245226	0.10583	0.0404526	-0.156391	0.112841
[R].iYASFnDTFVHVTDLSGkET.[I]	P39516	RPS14B	-0.0176628	#N/A	-0.00787824	#N/A	0.016063	#N/A	0.275711	#N/A	-0.0742445	#N/A		#N/A		#N/A		#N/A		#N/A		#N/A
[E].vGITAVHVkIR.[A]	P39516	RPS14B	0.661408	0.478165	0.0439965	1.91291	-0.236609	0.022889	0.270956	-0.382729	0.317913	0.278042				>3 sigma
[S].fNDTFVHVTDLSGkETIAR.[V]	P39516	RPS14B	-0.152258	0.258616	0.0868539	-0.274246	0.00476699	0.0927573	-0.0492862	0.00932888	-0.223144	0.0214206
[I].eDVTPVPSDSTR.[K]	P39516	RPS14B	0.382091	0.632293	0.353278	0.539252	0.466665	0.42036	0.546085	0.582092	0.285746	0.668098
[K].vkADRDESSPYAA.[M]	P39516	RPS14B	0.200944	0.200791	-0.105552	-0.00495622	0.0544933	-0.0439415	0.316438	0.10712	-0.300709	0.242092
[D].vTPVPSDSTR.[K]	P39516	RPS14B	-0.0320212	0.0342307	0.0892278	-0.000796896	-0.0403054	0.144689	0.150961	-0.175941	-0.0416093	0.191947
[F].vHVTDLSGkETIAR.[V]	P39516	RPS14B	0.647844	0.255333	0.0609833	0.197136	-0.0423026	0.214902	0.216597	0.0785602	-0.172708	-0.407969
[K].vkADRDESSPYAAM.[L]	P39516	RPS14B	0.192507	0.379737	-0.114736	-0.0706657	0.0828148	0.0751099	0.14722	0.0676855	-0.178317	-0.0306967
[M].lAAQDVAAk.[C]	P39516	RPS14B	0.386945	0.0869814	0.294308	0.19544	0.0238994	0.00616421	-0.174558	-0.0404259	0.183011	0.22015
[G].iTAVHVkIR.[A]	P39516	RPS14B	0.362491	0.175383	-0.19584	-0.0465024	-0.0360634	-0.12105	0.0168931	0.0649922	-0.149923	0.154212
[M].aNDLVQAR.[D]	P39516	RPS14B	-0.113502	#N/A	0.177192	#N/A	0.0217034	#N/A	0.12066	#N/A	-0.119838	#N/A		#N/A		#N/A		#N/A		#N/A		#N/A
[G].iTAVHVk.[I]	P39516	RPS14B	0.367232	0.233938	-0.0638556	-0.260074	0.0893537	0.103008	0.228238	0.0188788	-0.072237	0.0899584
[K].vkADRDESSPY.[A]	P39516	RPS14B	0.107367	#N/A	-0.0308394	#N/A	-0.0598477	#N/A	-0.028823	#N/A	-0.0315383	#N/A		#N/A		#N/A		#N/A		#N/A		#N/A
[P].fVMDTSYPAR.[I]	P04807	HXK2	-0.21497	0.346744	-0.0608534	0.101514	0.1195	-0.214598	0.295851	0.212241	-0.0716628	-0.353516
[G].fTFSFPASQNkINEGILQR.[W]	P04807	HXK2	1.39103	-0.022827	0.196162	-0.141631	-0.106657	0.264782	0.194979	-0.0294269	-0.132308	-0.133135	>3 sigma
[YF].lAIDLGGTNLR.[V]	P04806	HXK1	-0.0215227	0.183336	0.0096247	-0.0272678	0.11829	0.138108	0.193667	0.170434	-0.00521722	-0.0339136
[K].iVPAEDGSGAGAAVIAA.[L]	P04807	HXK2	0.447861	0.206434	0.419857	-0.186632	0.333298	0.44154	0.431668	0.292943	-0.420975	0.200212
[T].fSFPASQNkINEGILQR.[W]	P04807	HXK2	0.227735	1.18699	0.462598	-0.0740626	0.120325	0.162678	0.163529	0.104601	-0.142187	-0.0368816		>3 sigma
[R].iAEGkSVGIIGA.[-]	P04807	HXK2	0.332274	-0.0382317	0.310108	-0.3905	-0.0776756	-0.0483818	0.0526139	0.0472533	-0.174753	-0.00655114
[G].iNTTVQER.[K]	P04807	HXK2	0.193652	#N/A	-0.112381	#N/A	0.0201573	#N/A	0.260047	#N/A	-0.231655	#N/A		#N/A		#N/A		#N/A		#N/A		#N/A
[M].vHLGPkkPQAR.[K]	P04806	HXK1	0.127086	0.0885613	0.16343	0.197645	0.283663	0.32149	0.344961	0.284937	-0.03488	0.291152
[R].lALMDMYkQGF.[I]	P04807	HXK2	0.413432	#N/A	0.634649	#N/A	0.684222	#N/A	0.305786	#N/A	-0.214318	#N/A		#N/A		#N/A		#N/A		#N/A		#N/A
[H].iAADGSVYNR.[Y]	P04807	HXK2	0.251094	0.297133	-0.105968	-0.12388	0.11866	0.160584	0.112877	0.0868763	-0.168452	-0.0350514
[D].iTIDEESPRPGQQTFEkMSSGYYLGEILR.[L]	P04807	HXK2	0.735349	#N/A	0.496751	#N/A	-0.0893981	#N/A	0.32234	#N/A	0.0578476	#N/A		#N/A		#N/A		#N/A		#N/A		#N/A
[T].fDTTQSkYR.[L]	P04807	HXK2	0.414715	-0.0152934	-0.0351711	-0.314791	0.150747	0.0372545	0.269879	0.183777	-0.0464124	0.289864
[F].iFkNQDLSkFDkPFVMDTSYPAR.[I]	P04807	HXK2	0	#N/A	-1.19671	#N/A	0.180023	#N/A	-0.272543	#N/A	-0.306502	#N/A		#N/A	<-3 sigma	#N/A		#N/A		#N/A		#N/A
[F].iFkNQDLSk.[F]	P04807	HXK2	0.173286	0.542331	-0.0145223	-0.064674	0.28627	0.136336	0.234057	0.166749	-0.0726193	0.0262084
[T].lVAnTSNMPVAAR.[E]	P17255	VMA1	0.0822736	0.253505	0.0260014	-0.0274303	0.015954	0.012216	0.0185072	-0.00824596	-0.177505	0.0868928
[G].lTVGDPVLR.[T]	P17255	VMA1	0.0488392	0.153875	-0.0414823	-0.0176001	0.19575	0.117444	0.337994	0.0636112	-0.0637136	-0.0158914
[A].ikEESQSIYIPR.[G]	P17255	VMA1	0.387746	0.520994	0.00152366	-0.0541387	0.127007	0.0519824	0.162685	0.0345425	-0.0970197	0.156095
[P].lkAIkEESQSIYIPR.[G]	P17255	VMA1	-0.252525	0.360438	0.0278526	-0.250361	-0.0647555	-0.0526256	0.292671	0.125935	-0.175524	-0.0861932
[G].iTLAEYFR.[D]	P17255	VMA1	0.214457	0.335231	0.0283328	-0.223632	0.153433	0.179655	0.131435	0.0974691	-0.234636	0.170452
[K].lADSTGDVkHA.[V]	P17255	VMA1	0.0410876	0.151142	-0.0973996	0.0840276	0.101262	0.0993226	0.223634	0.127859	-0.201822	-0.0660886
[K].lADSTGDVkH.[A]	P17255	VMA1	0.0977236	0.162723	-0.051428	-0.0199227	0.324886	0.167864	-0.0621944	0.0170312	-0.145962	0.146923
[A].vAnGANWSk.[L]	P17255	VMA1	0.062672	0.228066	-0.0609962	-0.12474	0.180829	-0.0122428	0.251651	0.0227351	-0.0486409	-0.0504533
[K].fYDSNYPEFPVLR.[D]	P17255	VMA1	0.328331	0.585713	-0.0676325	-0.0128502	0.0639368	-0.226227	0.279605	0.148182	-0.369301	0.605592
[H].aVSSSkFFEPSR.[G]	P17255	VMA1	-0.290189	0.824306	0.132031	-0.134965	0.10369	0.0980674	0.19788	0.199076	-0.244827	0.0719977
[S].vSYSkYTNVLNk.[F]	P17255	VMA1	0.307829	#N/A	-0.130896	#N/A	0.105261	#N/A	0.255735	#N/A	-0.216822	#N/A		#N/A		#N/A		#N/A		#N/A		#N/A
[N].vSMIADSSSR.[W]	P17255	VMA1	0.241258	#N/A	0.226456	#N/A	0.378032	#N/A	0.136595	#N/A	-0.193749	#N/A		#N/A		#N/A		#N/A		#N/A		#N/A
[A].vALGSPDR.[T]	P17255	VMA1	0.147262	#N/A	0.0710088	#N/A	0.110588	#N/A	0.104155	#N/A	-0.0536784	#N/A		#N/A		#N/A		#N/A		#N/A		#N/A
[A].vSSSkFFEPSR.[G]	P17255	VMA1	0.35891	#N/A	0.0477899	#N/A	-0.0807536	#N/A	0.224612	#N/A	-0.115911	#N/A		#N/A		#N/A		#N/A		#N/A		#N/A
[M].iADSSSR.[W]	P17255	VMA1	0.182041	0.0410518	0.00111052	-0.143802	0.0681871	0.0714581	0.140824	0.0664622	-0.0144588	0.240741
[N].lVGEVIR.[I]	P17255	VMA1	-0.190191	0.0514705	-0.055368	0.054995	-0.0397575	0.0694212	0.310327	0.0608276	-0.203692	0.0259159
[T].lYHTWPVR.[V]	P17255	VMA1	0.178785	#N/A	0.302892	#N/A	0.0977263	#N/A	0.149748	#N/A	-0.094364	#N/A		#N/A		#N/A		#N/A		#N/A		#N/A
[S].vSYSkYTNVLNkFYDSNYPEFPVLR.[D]	P17255	VMA1	1.55359	#N/A	-0.135647	#N/A	0.000638044	#N/A	-0.00834789	#N/A	-0.550871	#N/A	>3 sigma	#N/A		#N/A		#N/A		#N/A		#N/A
[T].lAEYFR.[D]	P17255	VMA1	-0.137697	#N/A	-0.0749939	#N/A	-0.0211435	#N/A	0.015247	#N/A	0.000264251	#N/A		#N/A		#N/A		#N/A		#N/A		#N/A
[F].lSTDNIGTR.[E]	P17255	VMA1	0.0930142	0.211	-0.0625899	-0.126007	0.0902696	-0.024802	0.0688374	-0.0570699	0.0348028	-0.00178692
[R].iSLEDHAESEYGAIYS.[V]	P17255	VMA1	-0.816202	#N/A	-0.174562	#N/A	-0.193055	#N/A	0.46557	#N/A	-0.313882	#N/A		#N/A		#N/A		#N/A		#N/A		#N/A
[K].lSADYPL.[L]	P17255	VMA1	-0.391566	0.422855	0.377832	-0.748944	0.121839	0.309386	0.66913	0.301587	0.42713	-0.19364
[G].iDTPALDR.[T]	P17255	VMA1	0.042237	0.128764	0.00908217	-0.0320635	0.248454	0.197921	0.074001	-0.175305	-0.26061	0.063127
[W].fkQkYDADVLDk.[-]	P0C0W9	RPL11A	0.16241	0.369843	-0.122903	-0.17405	0.149898	0.0536732	0.289495	0.0708869	-0.212186	0.0361193
[R].aSkVLEQLSGQTPVQSkAR.[Y]	P0C0W9	RPL11A	0.0955745	0.644175	-0.138755	-0.0323317	0.282707	0.019657	0.274496	0.0121742	-0.16571	0.236958
[K].qkYDADVLDk.[-]	P0C0W9	RPL11A	-0.0553898	#N/A	0.093044	#N/A	0.171916	#N/A	0.10375	#N/A	-0.288186	#N/A		#N/A		#N/A		#N/A		#N/A		#N/A
[T].vSWFkQkYDADVLDk.[-]	P0C0W9	RPL11A	0.24433	1.28888	0.0898819	0.162114	-0.186024	-0.118872	0.18078	0.147415	-0.271799	0.0464397		>3 sigma
[N].iSVGESGDR.[L]	P0C0W9	RPL11A	0.273727	0.21734	-0.0724297	0.0224215	0.108913	-0.02562	0.129756	0.0310803	-0.0487803	0.0530476
[Q].lSGQTPVQSkAR.[Y]	P0C0W9	RPL11A	0.2205	0.175751	-0.10195	-0.043128	0.137719	0.0738329	0.191975	0.0897546	-0.130758	0.153833
[Y].vVMNRPGAR.[V]	P0C0W9	RPL11A	0.378604	0.190839	-0.0427716	0.00638659	0.127763	0.203259	0.222713	0.170926	0.199514	0.107902
[K].YDADVLDk.[-]	P0C0W9	RPL11A	0.22401	0.0665163	0.159969	-0.0492838	0.0372949	0.0203967	0.0511728	-0.207306	-0.031122	-0.126476
[G].lkVkEYQLR.[D]	P0C0W9	RPL11A	0.259526	#N/A	0.0684557	#N/A	-0.136564	#N/A	0.0692758	#N/A	0.0644593	#N/A		#N/A		#N/A		#N/A		#N/A		#N/A
[Q].lSGQTPVQSk.[A]	P0C0W9	RPL11A	0.215666	-0.043925	-0.0538855	0.0189683	-0.0192443	-0.246062	0.0810516	-0.0553104	-0.0963421	0.394767
[F].kQkYDADVLDk.[-]	P0C0W9	RPL11A	-0.17442	#N/A	-0.219411	#N/A	0.0496873	#N/A	0.153625	#N/A	0.0816537	#N/A		#N/A		#N/A		#N/A		#N/A		#N/A
[P].fkIDDSGVSIGkR.[Y]	P38088	GRS1	0.04569	0.545682	-0.184743	-0.0478651	0.162907	0.0876101	0.291407	0.256463	-0.201919	-0.0588329
[D].iGNPVTGETLESPR.[A]	P38088	GRS1	0.189441	-0.361262	0.080766	0.0405581	0.0905705	-0.250499	0.02896	-0.0126074	-0.0833163	0.295879
[K].lLEFNnSkTP.[F]	P38088	GRS1	0.00791289	#N/A	-0.186392	#N/A	0.0774388	#N/A	0.428236	#N/A	-0.348924	#N/A		#N/A		#N/A		#N/A		#N/A		#N/A
[H].lVEEVLEAR.[L]	P38088	GRS1	-0.376535	0.260084	-0.0449997	0.0708419	0.0507474	0.162607	0.196581	-0.0649816	-0.204426	0.261652
[G].vTIDFESAkDHSVTLR.[E]	P38088	GRS1	0.155886	0.157044	0.0328964	-0.121067	0.0815638	0.155438	0.207358	-0.0779463	-0.171979	-0.145038
[K].lDNPIEVTkWEIDLTkk.[L]	P38088	GRS1	0.172268	#N/A	-0.270491	#N/A	0.361204	#N/A	0.00169493	#N/A	-0.0312865	#N/A		#N/A		#N/A		#N/A		#N/A		#N/A
[D].lVPVTTEVAkILR.[K]	P38088	GRS1	-0.744913	0.573595	-0.131535	-0.0351909	-0.121262	0.0346436	0.261651	0.370188	-0.190618	0.280604
[A].vkLDDDVVkEYEEILAk.[I]	P38088	GRS1	-0.414535	0.483294	-0.257466	-0.0544757	0.228734	0.58866	0.338317	-0.0326316	-0.00610574	-1.69071										<-3 sigma
[D].iTYnGASWEEGTkDLTPFIAQAEAEAETD.[-]	P38088	GRS1	0	#N/A	0	#N/A	0.0504948	#N/A	-0.484997	#N/A	-0.567799	#N/A		#N/A		#N/A		#N/A		#N/A		#N/A
[K].iDGYSGPELGELMEkYDIGNPVTGETLESPR.[A]	P38088	GRS1	-0.241634	#N/A	-0.596898	#N/A	0.457236	#N/A	0.511304	#N/A	0.123235	#N/A		#N/A		#N/A		#N/A		#N/A		#N/A
[R].lkGDQEAR.[G]	P38088	GRS1	-0.249976	0.119697	0.0130546	0.0884671	0.192761	0.0598751	-0.0102582	-0.136793	-0.132372	0.103685
[F].iAQAEAEAETD.[-]	P38088	GRS1	0.136908	0.515577	-0.0811443	-0.376354	0.088134	0.206781	0.197861	0.0386012	-0.0412787	-0.0579313
[K].lFGPkFR.[K]	P38088	GRS1	-0.6007	-0.332482	-0.0107648	-0.322069	0.0486423	-0.0973351	0.0903108	-0.0186839	-0.195588	0.233882
[N].iIDAWR.[K]	P38088	GRS1	-0.722285	#N/A	-0.0901145	#N/A	0.299024	#N/A	0.179577	#N/A	-0.166973	#N/A		#N/A		#N/A		#N/A		#N/A		#N/A
[D].lkTGEIFR.[A]	P38088	GRS1	-0.385834	0.0549688	-0.124129	0.0277198	0.212056	0.00952678	0.142092	0.199481	-0.178391	0.210364
[Y].iNPkNDVDVIANPDGER.[A]	P38788	SSZ1	0.0970928	0.143385	-0.0102033	-0.006282	0.18274	0.099397	0.255216	0.112293	-0.139949	0.00929657
[L].lAETSFPVQkk.[L]	P38788	SSZ1	0.164342	0.307982	-0.00923469	0.0673459	0.115151	0.154217	0.207192	0.0396029	-0.23904	-0.24213
[K].lTVDEVVSRH.[L]	P38788	SSZ1	0.274959	#N/A	0.202344	#N/A	0.104518	#N/A	0.235385	#N/A	-0.109123	#N/A		#N/A		#N/A		#N/A		#N/A		#N/A
[K].lTVDEVVSR.[H]	P38788	SSZ1	0.0917406	0.294361	0.0452276	0.110697	0.169931	0.212998	0.142705	0.0593441	-0.15824	0.0308962
[S].iAYINPknDVDVIANPDGER.[A]	P38788	SSZ1	0.976981	0.818116	0.0445464	-0.210772	0.0352978	-0.305081	0.078941	0.176543	-0.22562	0.203751	>3 sigma
[V].lLAETSFPVQkk.[L]	P38788	SSZ1	0.246639	-0.00611758	-0.0216484	-0.184029	0.217956	0.12185	0.226279	0.166196	-0.370531	-0.0581198
[L].lTGGVSFTPk.[L]	P38788	SSZ1	-0.0862143	-0.202485	0.150453	0.0528513	0.0954521	0.10586	0.13998	0.0981975	-0.187954	0.069066
[T].lEPIPkEENAEEDDESEWSDDEPEVVR.[E]	P38788	SSZ1	0.121821	-0.0569255	0.0288812	-0.0134336	0.392313	-0.860427	0.763354	-0.172039	0.211233	0						<-3 sigma
[K].lTTNLEYTLPESVEILGPQnkNASNNPNE.[L]	P38788	SSZ1	1.14085	#N/A	1.13088	#N/A	0.550267	#N/A	0.239155	#N/A	0.137942	#N/A	>3 sigma	#N/A	>3 sigma	#N/A		#N/A		#N/A		#N/A	Yes
[K].lAAEDYIGSAVkEAVLTVPTN.[F]	P38788	SSZ1	0.13097	#N/A	0.172111	#N/A	0.0362462	#N/A	0.450174	#N/A	-0.259277	#N/A		#N/A		#N/A		#N/A		#N/A		#N/A
[L].lAHAEQFPFEkDVNVVVADFGGIR.[S]	P38788	SSZ1	0	#N/A	-0.411878	#N/A	0.0303068	#N/A	-0.0613312	#N/A	-0.260664	#N/A		#N/A		#N/A		#N/A		#N/A		#N/A
[E].lAASGAALQAR.[L]	P38788	SSZ1	0.469296	0.502526	0.0882225	-0.142095	0.00952346	-0.0314708	0.0264956	0.0590591	-0.130587	0.126715
[N].iNkDGALR.[V]	P38788	SSZ1	-0.0253606	0.0730131	0.0991703	0.0156757	0.0156436	0.0197916	0.198926	0.0909087	-0.109003	0.312384
[K].lTLkQAkGDFL.[I]	P38788	SSZ1	-0.309729	#N/A	0.0673128	#N/A	-0.116213	#N/A	0.0160948	#N/A	-0.0542992	#N/A		#N/A		#N/A		#N/A		#N/A		#N/A
[L].iHSGQPVNDFIDTATR.[H]	P05750	RPS3	0.178025	0.122807	0.00646019	-0.099559	0.226271	0.179916	0.154461	-0.0695415	-0.132219	0.0295301
[F].lIHSGQPVnDFIDTATR.[H]	P05750	RPS3	0.0347557	0.3885	0.0697017	-0.0745927	0.123856	0.000286168	0.230408	0.0796336	-0.135246	0.0113585
[G].lSAVAQAESMk.[F]	P05750	RPS3	0.155583	0.408025	-0.188656	-0.181123	0.170283	-0.0604867	0.216001	0.0941593	-0.130546	0.16283
[E].lAEEGYSGVEVR.[V]	P05750	RPS3	0.169626	0.212902	0.0159664	-0.117512	-0.114883	0.152184	0.0824021	0.232782	0.00742347	-0.01599
[G].lSAVAQAESMkFk.[L]	P05750	RPS3	0.0403337	0.139905	-0.0693895	-0.15286	0.0849695	0.110774	0.159413	0.211412	0.00813269	0.109178
[R].fkYAPGTIVLYAER.[V]	P05750	RPS3	-0.396085	0.00442865	-0.0270295	-0.204891	0.230824	-0.00799028	0.225873	-0.22709	0.104066	0.0188168
[T].iIEPkEEEPILAPSVkDYRPAEETEAqAEPVEA.[-]	P05750	RPS3	0.176508	0.407865	-0.214954	-0.229257	0.0905612	0.0735073	0.2014	0.112938	-0.587701	-0.54462
[P].iLAPSVkDYRPAEETEAQAEPVEA.[-]	P05750	RPS3	0.0465372	0.308797	0.146885	-0.172014	0.0406408	-0.0370016	0.170489	0.106003	-0.0111599	-0.037178
[S].aVAQAESMk.[F]	P05750	RPS3	0.124688	#N/A	-0.0185138	#N/A	0.304915	#N/A	0.440826	#N/A	-0.212532	#N/A		#N/A		#N/A		#N/A		#N/A		#N/A
[K].fADGFLIHSGQPVNDFIDTATR.[H]	P05750	RPS3	0.247199	#N/A	-0.0648362	#N/A	0.376858	#N/A	0.0150476	#N/A	-0.312882	#N/A		#N/A		#N/A		#N/A		#N/A		#N/A
[A].vAQAESMk.[F]	P05750	RPS3	0.119202	0.243547	-0.133992	-0.147509	0.0199391	-0.0099282	0.182065	0.0890759	-0.119594	-0.0605869
[S].vkDYRPAEETEAQAEPVEA.[-]	P05750	RPS3	-0.160073	0.193749	-0.174688	-0.359254	0.134461	0.22338	-0.0887007	0.488875	-0.693832	0.051682
[A].vTIIEPkEEEPILAPSVkDYRPAEETEAQAEPVEA.[-]	P05750	RPS3	0	1.11097	-0.0381012	-0.265189	-0.290167	0.405335	-0.303529	0.70059	-0.448769	-0.0835923		>3 sigma
[K].iMRDPAkSR.[T]	P05750	RPS3	0.288213	#N/A	-0.0210854	#N/A	0.0823784	#N/A	0.272329	#N/A	-0.159097	#N/A		#N/A		#N/A		#N/A		#N/A		#N/A
[G].vLGIkVk.[I]	P05750	RPS3	0.0224215	0.265358	-0.222331	-0.12319	0.137831	0.0956447	0.306885	0.184966	-0.0237578	0.662027
[D].yRPAEETEAQAEPVEA.[-]	P05750	RPS3	0.00562614	-0.290644	-0.0790003	-0.407471	0.142787	0.0290012	0.167889	0.0173054	-0.202748	-0.281867
[T].lLVQkR.[F]	P05750	RPS3	-0.201587	#N/A	-0.320415	#N/A	0.0964648	#N/A	0.175718	#N/A	0.227878	#N/A		#N/A		#N/A		#N/A		#N/A		#N/A
[D].fIDTATR.[H]	P05750	RPS3	0.175209	0.229531	-0.0637847	-0.0931562	0.0414781	0.0744921	0.254918	0.0965406	-0.0298783	0.055205
[T].iVLYAER.[V]	P05750	RPS3	-0.149139	-0.0222357	0.00920569	0.0224341	0.102692	0.471516	0.0111446	-0.137582	-0.0449387	0.249297
[K].fADGFL.[I]	P05750	RPS3	0	#N/A	0.388144	#N/A	0	#N/A	0	#N/A	0	#N/A		#N/A		#N/A		#N/A		#N/A		#N/A
[T].lISWkLTGDDQkFGVPVR.[S]	P38011	ASC1	0.0358928	1.60542	-0.59062	0.489021	0.0414672	0.0401495	0.175792	0.132826	-0.285923	0.0859472		>3 sigma
[K].lTGDDQkFGVPVR.[S]	P38011	ASC1	0.277892	0.250266	-0.0255518	-0.0852956	-0.00202859	0.0103877	0.158345	0.0649465	0.00870734	0.140735
[L].fAGYTDNVIR.[V]	P38011	ASC1	0.0762204	0.251779	0.00028169	-0.108281	0.051331	0.121675	0.159798	0.10303	-0.0836451	0.155627
[T].lLGHNDWVSQVR.[V]	P38011	ASC1	0.538821	0.475066	-0.0627729	-0.0932102	0.0154627	-0.15072	0.167448	0.0804457	-0.158187	0.141583
[L].lGHnDWVSQVR.[V]	P38011	ASC1	0.29287	0.157332	0.301535	0.0695799	0.145788	0.100797	-0.0213256	0.157972	-0.131496	0.0485159
[W].kLTGDDQkFGVPVR.[S]	P38011	ASC1	0.20168	0.968807	-0.182445	-0.0381432	0.418301	0.0345065	0.303215	0.177607	-0.750004	-0.0262764		>3 sigma
[T].lFAGYTDNVIR.[V]	P38011	ASC1	-0.0351788	0.689889	0.0482128	0.105156	-0.0237101	-0.0363845	0.194859	0.112804	-0.0290533	0.136605
[R].lWDVATGETYQR.[F]	P38011	ASC1	-0.0652604	0.178869	-0.109099	-0.171634	0.180064	0.137369	0.162931	0.226799	-0.159101	0.0211119
[S].vDIDkkASMIISGSR.[D]	P38011	ASC1	0.825934	0.522342	0.0105737	1.33469	-0.0309471	-0.106533	0.0923039	0.0951977	-0.13119	-0.0048688				>3 sigma
[S].lAWSADGQTLFAGYTDNVIR.[V]	P38011	ASC1	0.97067	1.01895	0.357365	-0.137491	0.321455	0.0679117	0.402077	-0.476096	-0.361919	0.527803	>3 sigma	>3 sigma									Yes
[D].vATGETYQR.[F]	P38011	ASC1	0.13887	0.0889618	-0.0697327	0.00306182	-0.159935	0.0355954	0.233602	0.0586462	-0.01725	0.143655
[F].aGYTDNVIR.[V]	P38011	ASC1	-0.17348	0.0467581	0.0892511	-0.236201	0.043372	0.0277318	0.199603	0.0110821	-0.198628	-0.0958346
[V].aTGETYQR.[F]	P38011	ASC1	0.531852	0.297661	0.549086	0.0775506	0.0748507	-0.275674	0.264805	-0.0122142	-0.441367	0.385704
[R].fVGHkSDVMSVDIDkkASM.[I]	P38011	ASC1	0.183555	0.111314	0.115289	-0.0871019	0.173459	-0.0320584	0.255865	0.13927	-0.165319	-0.063178
[A].lSASWDkTLR.[L]	P38011	ASC1	0.0558871	0.00152583	0.0918322	-0.405877	0.196712	-0.127964	0.0967581	0.142525	-0.227998	0.152475
[G].iGYDFVPQVLDRk.[L]	P32582	CYS4	0.276755	0.617943	0.0884469	-0.264862	0.166607	0.0235638	-0.0292003	-0.106615	-0.279648	-0.0632887
[H].lkPVVSVkETAk.[V]	P32582	CYS4	0.331831	0.398338	0.0295511	-0.0432779	0.276469	0.39227	0.361623	0.186406	-0.10807	0.511651
[K].fVDDEWLkkNN.[L]	P32582	CYS4	-0.245122	0.308797	-0.138733	0.0465749	0.1475	0.0680116	0.186589	0.192747	-0.0856191	-0.0571461
[K].lIDVWYkTDDkPS.[F]	P32582	CYS4	0.0220163	0.318119	-0.0882392	0.0482453	0.202797	0.275402	0.161735	0.282593	-0.274157	0.0433329
[N].lWDDDVLAR.[F]	P32582	CYS4	-0.0245767	0.069221	0.0534115	0.102161	0.13389	0.109499	0.260775	0.166704	0.040589	-0.259425
[K].lEkEIPGAVILDQYnNMMNPEAHY.[F]	P32582	CYS4	-0.299963	#N/A	-0.437114	#N/A	0.465928	#N/A	0.152511	#N/A	-0.00386143	#N/A		#N/A		#N/A		#N/A		#N/A		#N/A
[K].lEkEIPGAVILDQYNNM.[M]	P32582	CYS4	-0.825653	#N/A	-0.285807	#N/A	-0.271881	#N/A	-0.354354	#N/A	-0.382096	#N/A	<-3 sigma	#N/A		#N/A		#N/A		#N/A		#N/A
[S].mVEEAEASGR.[I]	P32582	CYS4	0.0512055	0.230993	0.0320686	-0.0277172	0.194173	0.127284	0.235692	0.157608	-0.195705	0.143977
[K].fVDDEWLkknNLWDDDVLAR.[F]	P32582	CYS4	0.62354	1.16384	0.153012	0.0837011	0.11447	-0.0946407	0.136465	0.286891	-0.00394924	0.0340524		>3 sigma
[M].tkSEQQADSR.[H]	P32582	CYS4	-0.0118537	-0.0302982	-0.0694938	-0.136298	0.227694	0.150764	0.060289	0.0603514	-0.136533	-0.0662175
[G].lVTLSELLR.[K]	P32582	CYS4	-0.948412	-0.256624	-0.107773	-0.22854	-0.124937	0.036314	-0.0714646	0.0611871	0.0818528	-0.0853412	<-3 sigma
[E].lYNPGGSIkDR.[I]	P32582	CYS4	-0.0391453	0.273162	-0.0327377	-0.066271	0.120896	0.179107	0.329136	0.212787	-0.0588985	0.242684
[D].fVPQVLDRk.[L]	P32582	CYS4	-0.12684	-0.135557	-0.136521	-0.0445039	0.209416	0.420768	0.238884	0.443836	-0.220453	-0.136564
[F].ikFDENSkLSDLNR.[F]	P32582	CYS4	-0.434512	0.435027	0.153869	-0.0607385	0.174706	0.0841112	0.204605	0.241008	-0.394453	0.159091
[A].lIGAIkGYR.[T]	P32582	CYS4	0.114785	0.139713	-0.148893	0.0635758	0.0459367	0.0811265	0.163892	0.270389	-0.105993	0.324613
[F].ikFDENSk.[L]	P32582	CYS4	-0.362894	0.157491	-0.104521	0.0744777	0.0201937	0.300321	0.166585	0.125843	-0.0463214	0.216679
[G].iGYDFVPQVLDR.[K]	P32582	CYS4	0.213013	0.0689361	0.0966333	0.190167	0.133172	0.0788168	0.152712	0.233682	0.0145359	-0.0638864
[A].iFPDSIR.[S]	P32582	CYS4	-0.109218	0.479921	0.0708153	0.00727627	0.0450575	0.136876	0.288396	0.212344	-0.054573	-0.0233745
[A].lGAEIIR.[T]	P32582	CYS4	0.146854	0.151926	-0.0625149	0.0598547	0.0561369	-0.102677	0.182796	0.0481245	0.00981099	0.201684
[KDFTRV].lSELLR.[RIEKDT]	P32582	CYS4	0.366537	#N/A	-0.0446094	#N/A	0.417198	#N/A	0.351976	#N/A	0.136357	#N/A		#N/A		#N/A		#N/A		#N/A		#N/A
[S].vAEAkkFEPTYR.[L]	P0CX31	RPS24A	0.46181	0.293838	-0.0790103	-0.245544	0.149556	0.105794	0.237148	0.249708	-0.219192	0.0655774
[Q].fVVDVLHPnR.[A]	P0CX31	RPS24A	0.307108	0.19634	-0.0176699	-0.0751743	0.176198	0.0679344	0.092074	0.0162217	-0.0929305	0.00833055
[G].lVYNSVAEAkkFEPTYR.[L]	P0CX31	RPS24A	0.352751	0.499902	0.0595369	-0.019097	-0.030995	0.0700277	0.150272	0.145973	-0.291546	0.0417612
[F].vVDVLHPNR.[A]	P0CX31	RPS24A	0.227558	0.137356	-0.052469	-0.0602446	0.140304	-0.0103839	0.215395	0.0275626	-0.102009	-0.104958
[G].lAEkVEkASR.[Q]	P0CX31	RPS24A	0.243683	0.341593	-0.0944157	-0.146506	0.131352	0.0644997	0.207969	0.0887586	-0.114219	0.157298
[N].sVAEAkkFEPTYR.[L]	P0CX31	RPS24A	0.445584	0.2457	-0.0194286	-0.0514458	0.124581	0.113327	0.145693	0.112111	-0.279242	0.0519246
[K].lAEVYkAEkDAVSVFG.[F]	P0CX31	RPS24A	0.127636	#N/A	-0.246591	#N/A	0.17906	#N/A	0.264692	#N/A	-0.00307404	#N/A		#N/A		#N/A		#N/A		#N/A		#N/A
[N].vSkDELR.[E]	P0CX31	RPS24A	0.513811	0.139696	0.0337321	-0.0304656	0.0189883	0.200281	0.337382	0.203122	-0.442908	0.148992
[K].iFGTGkR.[L]	P0CX31	RPS24A	0.154617	0.204256	-0.113777	-0.00473594	0.208128	0.155151	0.241333	0.125498	-0.234174	0.0270642
[D].aVSVFGFR.[T]	P0CX31	RPS24A	0.186535	0.505373	0.275488	-0.405964	-0.252457	-0.279081	-0.0938822	0.263202	0.0276623	-0.0272921
[S].vAEAkk.[F]	P0CX31	RPS24A	0.266286	#N/A	-0.0233656	#N/A	-0.608948	#N/A	0.258285	#N/A	0.0575935	#N/A		#N/A		#N/A		#N/A		#N/A		#N/A
[E].lkkAEAEAYVNPEkAEEAR.[L]	P15705	STI1	-0.0625976	0.674867	-0.0520467	-0.0715724	0.162065	0.0430367	0.285793	-0.107226	-0.202442	-0.0141673
[Q].iAVkEYASALETLDAAR.[T]	P15705	STI1	-0.00492939	0.749883	-0.219304	-0.127981	0.100315	0.0699134	0.151265	0.121662	-0.316086	0.0935162
[K].lGDLkkTIEYYQkS.[L]	P15705	STI1	0.392563	0.27794	-0.14686	-0.331473	0.218351	-0.0343031	0.214087	-0.0605382	-0.0130617	0.109898
[S].iLQQAQQNPAALQEHMkNPEVFkk.[I]	P15705	STI1	-0.0609956	#N/A	0.136793	#N/A	0.542497	#N/A	0.400327	#N/A	-0.43501	#N/A		#N/A		#N/A		#N/A		#N/A		#N/A
[K].lIGYkQNPQAIGQDLFTDPR.[L]	P15705	STI1	0.64878	0	0.291578	-0.636301	0.483616	0.0493154	0.0186929	-0.257926	-0.328926	-0.0438158
[R].fQPGTSNETPEETYQR.[A]	P15705	STI1	0.248419	-0.730677	-0.193016	-0.38661	-0.1931	0.255407	0.110576	0.00891559	-0.227634	-0.715932
[T].lIAAGIIR.[T]	P15705	STI1	-0.0512489	0.765721	-0.273085	-0.636441	-0.00614295	0.576176	0.147969	0.00921712	-0.355816	0.102089
[R].tADILTk.[L]	P15705	STI1	0.228897	#N/A	0.0465214	#N/A	0.24439	#N/A	0.173104	#N/A	-0.206475	#N/A		#N/A		#N/A		#N/A		#N/A		#N/A
[R].iGnAYHk.[L]	P15705	STI1	-0.0281685	#N/A	0.0151179	#N/A	0.382676	#N/A	0.29391	#N/A	-0.227929	#N/A		#N/A		#N/A		#N/A		#N/A		#N/A
[L].iAAGIIR.[T]	P15705	STI1	-0.122178	#N/A	0.370269	#N/A	0.238986	#N/A	0.0508172	#N/A	-0.166908	#N/A		#N/A		#N/A		#N/A		#N/A		#N/A
[R].sVVIHAGQDDLGkGDTEESLkTGNAGPR.[P]	P00445	SOD1	0.0780649	0.500511	-0.00135079	-0.229951	-0.00483864	-0.00393822	0.121461	-0.210023	-0.336098	-0.0384207
[R].sVVIHAGQDDLGkGDTEESLkTGnAGPRPAcGVIGLTN.[-]	P00445	SOD1	-0.195554	0	0.575929	-0.0108037	0.242024	1.35251	-0.291823	1.02621	-0.448225	-0.113592						>3 sigma		>3 sigma
[A].cGVIGLTN.[-]	P00445	SOD1	0	#N/A	1.28197	#N/A	-0.136493	#N/A	0.832477	#N/A	-2.04255	#N/A		#N/A	>3 sigma	#N/A		#N/A		#N/A	<-3 sigma	#N/A
[K].lLkENIIQMEMIENR.[T]	P07149	FAS1	-0.238327	#N/A	-0.271243	#N/A	-0.193489	#N/A	0.146654	#N/A	-0.191168	#N/A		#N/A		#N/A		#N/A		#N/A		#N/A
[T].lSEPVQGELkPTVILk.[L]	P07149	FAS1	-1.06889	#N/A	-0.2406	#N/A	0.081398	#N/A	0.1388	#N/A	-0.252869	#N/A	<-3 sigma	#N/A		#N/A		#N/A		#N/A		#N/A
[K].lLHQYYGDDESkIPAVEY.[F]	P07149	FAS1	0.497211	#N/A	0.150885	#N/A	-0.181801	#N/A	0.227225	#N/A	-0.152971	#N/A		#N/A		#N/A		#N/A		#N/A		#N/A
[A].lIENWAADSVSSR.[V]	P07149	FAS1	0.159477	-0.839739	0.0428669	0.42194	0.103692	0.0632949	0.468124	-0.173802	0.0567854	0.0130938		<-3 sigma
[L].lkENIIQMEMIENR.[T]	P07149	FAS1	0.0015137	#N/A	0.0165357	#N/A	0.116389	#N/A	0.163739	#N/A	-0.22661	#N/A		#N/A		#N/A		#N/A		#N/A		#N/A
[F].fIASQLQEQFNk.[I]	P07149	FAS1	0.10576	#N/A	0.397748	#N/A	-0.0190352	#N/A	0.311374	#N/A	-0.131043	#N/A		#N/A		#N/A		#N/A		#N/A		#N/A
[R].lAGkYIPNLTAkP.[F]	P07149	FAS1	0.447268	#N/A	-0.17294	#N/A	0.149553	#N/A	0.216955	#N/A	-0.137559	#N/A		#N/A		#N/A		#N/A		#N/A		#N/A
[K].lLQENDTTLVkTkE.[L]	P07149	FAS1	-0.017547	#N/A	-0.22517	#N/A	0.31355	#N/A	0.297477	#N/A	-0.108994	#N/A		#N/A		#N/A		#N/A		#N/A		#N/A
[S].vVNQPTGkIVDVVGTLSR.[N]	P07149	FAS1	0.196819	#N/A	-0.0610078	#N/A	0.20089	#N/A	0.223206	#N/A	-0.269416	#N/A		#N/A		#N/A		#N/A		#N/A		#N/A
[G].iVDYEAGASHGNPVVDFLkR.[N]	P07149	FAS1	0.903708	#N/A	-0.204834	#N/A	-0.102036	#N/A	0.128027	#N/A	-0.478447	#N/A		#N/A		#N/A		#N/A		#N/A		#N/A
[S].lWQSEHLEAVVDQDVQR.[T]	P07149	FAS1	0.424704	0.622792	-0.0778574	-0.275475	0.10007	-0.0197966	0.140444	0.145332	-0.131901	-0.0686867
[D].lTGSEPIkEIIDNWEkYEQS.[-]	P07149	FAS1	0	#N/A	0	#N/A	0.322715	#N/A	0.289051	#N/A	-0.620269	#N/A		#N/A		#N/A		#N/A		#N/A		#N/A
[S].iMDGIHDGHIkk.[L]	P07149	FAS1	0.017224	#N/A	0.0259129	#N/A	0.0790629	#N/A	0.240729	#N/A	-0.235583	#N/A		#N/A		#N/A		#N/A		#N/A		#N/A
[S].lLDkPDEAIEkVFNAYPAAR.[E]	P07149	FAS1	0.00426588	0.866638	-0.459647	1.41828	0.187371	0.335741	0.237844	-0.4029	-0.201206	0.313201				>3 sigma
[A].vVDQDVQR.[T]	P07149	FAS1	0.123862	0.195848	0.0471109	0.0663012	0.3157	0.0136839	0.180912	-0.113952	-0.196434	-0.5035
[K].lVPTLEAkR.[D]	P07149	FAS1	0.0684133	0.0700027	-0.113892	-0.196907	0.215177	0.155808	0.335108	0.0966507	-0.180196	0.305401
[L].ikNkSGkIFVETk.[F]	P07149	FAS1	0.171787	#N/A	-0.353921	#N/A	0.364458	#N/A	0.483099	#N/A	-0.179144	#N/A		#N/A		#N/A		#N/A		#N/A		#N/A
[R].lNADFQkPWFATVnGQAR.[D]	P07149	FAS1	0.134248	#N/A	0.106393	#N/A	0.502916	#N/A	0.0195373	#N/A	0.0349556	#N/A		#N/A		#N/A		#N/A		#N/A		#N/A
[N].vSFNAkDIQIPVYDTFDGSDLR.[V]	P07149	FAS1	0.201228	#N/A	-0.30456	#N/A	0.15686	#N/A	0.00957877	#N/A	-0.155036	#N/A		#N/A		#N/A		#N/A		#N/A		#N/A
[N].iIkENVkVAR.[L]	P07149	FAS1	0.356274	#N/A	0.08916	#N/A	-0.117377	#N/A	0.206094	#N/A	-0.151063	#N/A		#N/A		#N/A		#N/A		#N/A		#N/A
[R].vSGDLNPIH.[V]	P07149	FAS1	-0.0100248	#N/A	0.0377297	#N/A	0.1838	#N/A	0.245769	#N/A	-0.296483	#N/A		#N/A		#N/A		#N/A		#N/A		#N/A
[A].lQWTGGR.[G]	P07149	FAS1	0.108955	0.431461	0.0150504	0.076116	0.111318	0.0163102	0.333087	0.28132	-0.173905	-0.0814848
[L].lDkPDEAIEkVFNAYPAAR.[E]	P07149	FAS1	0.131124	#N/A	0.159059	#N/A	0.121648	#N/A	0.236012	#N/A	-0.258269	#N/A		#N/A		#N/A		#N/A		#N/A		#N/A
[KDFTRV].lSELIR.[RIEKDT]	P07149	FAS1	0.366537	#N/A	-0.0446094	#N/A	0.417198	#N/A	0.351976	#N/A	0.136357	#N/A		#N/A		#N/A		#N/A		#N/A		#N/A
[N].fSWASEGISkkTR.[I]	P0CX39	RPS8A	0.312047	0.403896	-0.0497975	-0.1636	0.0813129	0.101666	0.215551	-0.0316082	-0.100822	0.223741
[R].iAGVVYHPSnNELVR.[T]	P0CX39	RPS8A	0.278144	#N/A	-0.106426	#N/A	0.131758	#N/A	0.190401	#N/A	-0.288133	#N/A		#N/A		#N/A		#N/A		#N/A		#N/A
[A].iVQIDATPFR.[Q]	P0CX39	RPS8A	0.148983	0.255447	-0.126124	-0.0762963	0.0982451	-0.0598866	0.13733	0.082969	-0.039721	0.10263
[A].aIVQIDATPFR.[Q]	P0CX39	RPS8A	0.128736	0.422429	0.0295431	-0.237035	0.0546241	-0.0376007	0.125771	-0.000306675	-0.097922	-0.0482944
[R].iETGNFSWASEGISkkTR.[I]	P0CX39	RPS8A	0.158103	0.260872	-0.11635	-0.070434	0.182111	-0.284039	0.355779	-0.00163888	-0.288227	0.219162
[T].lTkAAIVQIDATPFR.[Q]	P0CX39	RPS8A	0.191845	0.156513	-0.117632	-0.0480525	-0.0487964	-0.035632	0.137738	0.0380331	-0.17328	-0.0398458
[R].AASAkIESSVESQ.[F]	P0CX39	RPS8A	0.290216	0.260713	0.116112	0.0182084	0.0479996	0.10539	0.178508	0.0299627	-0.126243	-0.111999
[C].iSSRPGQSGR.[C]	P0CX39	RPS8A	0.115992	0.28709	-0.0525797	-0.0674442	0.0424991	0.0464642	0.152186	-0.0182461	-0.17595	-0.0473063
[G].vVYHPSNNELVR.[T]	P0CX39	RPS8A	0.166718	0.0686932	0.046566	-0.0308418	0.168766	0.182418	0.13804	0.0516681	-0.0696286	-0.0138701
[W].aSEGISkkTR.[I]	P0CX39	RPS8A	0.13333	0.254065	-0.338876	-0.284368	0.0799035	-0.135778	0.507208	0.743367	0.198517	0.879822
[T].vAkSkNAER.[K]	P0CX39	RPS8A	0.160825	0.211467	-0.166718	-0.182516	0.1519	0.18638	0.405735	0.0614703	-0.0859998	0.0857382
[A].aSAkIESSVESQFSAGR.[L]	P0CX39	RPS8A	0.354089	#N/A	0.140095	#N/A	0.235607	#N/A	0.031742	#N/A	-0.0154218	#N/A		#N/A		#N/A		#N/A		#N/A		#N/A
[Q].iDATPFR.[Q]	P0CX39	RPS8A	0.196304	0.0663722	0.00544703	-0.0953686	0.210419	-0.0470787	0.202954	0.0101344	0.0378881	0.0167437
[N].vkEEETVAkSkNAER.[K]	P0CX39	RPS8A	0.13179	#N/A	-0.453931	#N/A	-0.342753	#N/A	0.154954	#N/A	-0.0355545	#N/A		#N/A		#N/A		#N/A		#N/A		#N/A
[S].lEFnSQPDYR.[E]	P06168	ILV5	-0.109147	0.343016	-0.161245	-0.131153	0.0424081	-0.0331805	0.209594	0.0208955	-0.343924	0.0520877
[L].fTVEDAIkR.[G]	P06168	ILV5	0.201553	0.292275	-0.0491404	-0.020624	0.177165	0.174439	0.190815	0.171938	-0.159138	0.0318104
[N].fGGTVETVYER.[A]	P06168	ILV5	0.160413	0.160826	0.0286795	-0.0375479	0.00492677	0.0307545	0.137522	0.152913	-0.0773132	0.099262
[A].lkPVFQDLYESTknGTETkR.[S]	P06168	ILV5	0.546899	-0.240328	0.0421443	-0.208585	0.120783	0.140661	0.192071	0.175174	-0.24678	0.20033
[A].lIGYGSQGYGQGLNLR.[D]	P06168	ILV5	-0.185393	-0.146745	-0.465531	-0.237627	0.308657	-0.100527	0.35688	-0.0137504	0.0589707	0.200965
[M].fLAQYDVLR.[E]	P06168	ILV5	-0.00317383	0.466932	-0.0285179	3.34458e-05	0.112398	0.108258	0.18364	0.143137	-0.18499	0.130353
[N].lFTVEDAIkR.[G]	P06168	ILV5	0.319835	0.063724	-0.0829705	0.0546481	0.0474905	-0.124412	0.178305	0.0158942	-0.137538	-0.279981
[K].aAIEDGWVPGkNL.[F]	P06168	ILV5	-0.340827	0.309955	0.0017456	-0.303946	0.313315	0.186473	0.172871	0.47522	0.0479904	0.0763348
[N].aLkPVFQDLYESTknGTETkR.[S]	P06168	ILV5	-0.739986	0.453753	-0.11026	0.0562973	0.126952	0.0466315	0.161409	0.0327736	-0.313715	0.217349
[D].lDVILVAPkGSGR.[T]	P06168	ILV5	-0.743279	0.254647	-0.199388	-0.152913	0.232363	-0.0659731	0.320336	-0.0560274	-0.146274	-0.0351392
[Q].iNFGGTVETVYER.[A]	P06168	ILV5	0.156922	0.351835	-0.0546963	0.114206	0.218284	0.0785319	0.0355169	0.0616635	-0.197631	0.0034915
[G].fSPVFkDLTHVEPPkDLDVILVAPkGSGR.[T]	P06168	ILV5	0	#N/A	0	#N/A	-0.0393168	#N/A	-0.162808	#N/A	-0.158756	#N/A		#N/A		#N/A		#N/A		#N/A		#N/A
[A].aIEDGWVPGkNLFTVEDAIkR.[G]	P06168	ILV5	0.493606	#N/A	-0.25044	#N/A	-0.0531353	#N/A	0.0559793	#N/A	-0.300393	#N/A		#N/A		#N/A		#N/A		#N/A		#N/A
[Y].gSQGYGQGLNLR.[D]	P06168	ILV5	-0.0756318	#N/A	0.0537927	#N/A	-0.313472	#N/A	0.294822	#N/A	-0.192157	#N/A		#N/A		#N/A		#N/A		#N/A		#N/A
[L].aQYDVLR.[E]	P06168	ILV5	0.00689361	#N/A	0.0165244	#N/A	0.229457	#N/A	0.382416	#N/A	-0.0370243	#N/A		#N/A		#N/A		#N/A		#N/A		#N/A
[D].fAPTSPFGGARPGR.[V]	P05755	RPS9B	0.166531	0.380152	0.104025	-0.049521	0.20923	0.0869675	0.1489	0.113788	-0.0792752	0.0674659
[K].lAGEFGLkNkR.[E]	P05755	RPS9B	0.129901	0.141291	-0.145867	-0.117339	0.000650003	-0.0165402	0.165025	0.213599	0.144659	0.21126
[A].lkVEDFLER.[R]	P05755	RPS9B	0.0402809	0.290065	-0.0950026	-0.158371	-0.0424825	0.0938831	0.019723	-0.0769194	0.100645	0.0539831
[R].lDSEkHIDFAPTSPFGGAR.[P]	P05755	RPS9B	0.198093	0.725841	0.0919318	0.252771	0.319903	-0.120318	0.282835	0.00930166	-0.082866	0.135386
[H].iDFAPTSPFGGARPGR.[V]	P05755	RPS9B	0.118498	0.314757	0.281973	-0.225895	0.0173111	-0.0388919	0.0976066	0.156541	-0.185064	0.20237
[R].iSFQLSkIR.[R]	P05755	RPS9B	0.0519267	-0.279649	-0.156806	-0.347988	0.0317529	-0.13506	0.0567709	-0.250462	0.00309734	0.162792
[E].aSGEAAEEAEDEE.[-]	P05755	RPS9B	0.0595289	1.27284	-0.349241	0.76372	0.240613	0.689879	0.774763	0.258987	-0.634706	1.40735		>3 sigma								>3 sigma
[H].iAVGkQIVNIPSFMVR.[L]	P05755	RPS9B	0.383247	0.340159	-0.0249867	-0.204264	0.0529076	0.0774325	0.22003	0.149252	-0.161175	-0.0478785
[Q].iVNIPSFMVR.[L]	P05755	RPS9B	0.227984	-0.0446577	0.00860191	-0.183425	0.0531754	-0.18804	0.144612	0.0167769	-0.0874655	0.198939
[R].lQTQVYk.[L]	P05755	RPS9B	0.213399	0.249543	0.00208685	0.107619	0.136294	-0.0140465	0.140441	0.0307465	-0.00886956	0.208231
[R].lQTQVYkLG.[L]	P05755	RPS9B	0.150745	0.395397	0.145836	-1.00933	-0.00304388	0.147234	0.197499	-0.0615885	-0.090663	-0.302689				<-3 sigma
[R].lFEGNAL.[I]	P05755	RPS9B	0	0.0362403	-0.533272	0.575351	0.261989	0	-0.71457	0	-0.316721	0
[RKYD].lDAELk.[LGVD]	P05755	RPS9B	0.0218534	#N/A	-0.30986	#N/A	0.0466594	#N/A	0.138786	#N/A	-0.105277	#N/A		#N/A		#N/A		#N/A		#N/A		#N/A
[L].lEMSTEDFVk.[L]	Q01855	RPS15	0.312893	0.223298	-0.0373016	0.163324	0.235052	0.347702	0.201345	0.113619	-0.233525	-0.311229
[L].lEMSTEDFVkLAPAR.[V]	Q01855	RPS15	0.402016	-0.0879815	-0.029925	-0.185317	0.0305019	-0.0144116	-0.0175839	0.0970102	-0.223586	-0.0833697
[L].aAPENEkPAPVR.[T]	Q01855	RPS15	0.146716	0.362762	-0.0511894	-0.0165762	0.168943	0.112358	0.231277	0.0775141	-0.177316	-0.0437905
[K].lLEMSTEDFVk.[L]	Q01855	RPS15	0.224144	#N/A	-0.143259	#N/A	0.252089	#N/A	0.357865	#N/A	-0.340252	#N/A		#N/A		#N/A		#N/A		#N/A		#N/A
[K].lAAPEnEkPAPVR.[T]	Q01855	RPS15	0.237283	0.394628	-0.0497837	-0.071047	0.165146	0.0676278	0.236661	0.101501	-0.144876	0.0213228
[S].iTYTPVR.[H]	Q01855	RPS15	0.162005	0.32786	-0.0162648	-0.103595	0.13588	0.036294	0.0655845	-0.000580625	-0.145956	0.0111329
[A].lkQEGAAnkTVVVVGTVTDDAR.[I]	P0CX49	RPL18A	-0.10601	0.51261	0.203089	0.00617193	0.0821778	0.0423931	0.26065	0.0126192	-0.246349	0.0955878
[T].vVVVGTVTDDAR.[I]	P0CX49	RPL18A	0.144174	0.222657	-0.0636269	-0.0985851	0.0636675	0.0293713	0.228405	0.051803	-0.0489993	0.0877898
[C].iTLDQLAVR.[A]	P0CX49	RPL18A	0.0671592	0.322742	-0.214899	0.064069	-0.0168548	0.0405864	0.215625	0.0746886	-0.0441843	0.195301
[H].fGMGPHkGkAPR.[I]	P0CX49	RPL18A	0.173199	0.064455	-0.135991	-0.15389	0.163089	0.138479	0.226918	0.124296	-0.154841	0.0977695
[M].gIDHTSkQHkR.[S]	P0CX49	RPL18A	0.454693	0.274481	-0.3206	-0.317615	0.218574	0.0736511	0.310791	0.146006	-0.221035	0.090321
[A].lFLSkINRPPVSVSR.[I]	P0CX49	RPL18A	0.527186	1.04313	0.0752102	-1.37992	0.571293	0.308568	0.20941	-0.271688	-0.0774103	0.214426		>3 sigma		<-3 sigma
[T].lDQLAVR.[A]	P0CX49	RPL18A	0.262654	#N/A	0.17381	#N/A	0.0588389	#N/A	0.226408	#N/A	0.00325861	#N/A		#N/A		#N/A		#N/A		#N/A		#N/A
[M].lAGTTESPGEYFYkDGkR.[L]	P50094	IMD4	-0.303034	0.239369	0.145706	-0.0276058	0.00120134	0.0991637	0.322444	0.1267	-0.307623	-0.073031
[G].lVNFPSSAVSLQTkLTkk.[I]	P50094	IMD4	0.146108	-0.137341	-0.088088	-0.330596	0.206543	0.20464	0.219202	0.0341664	-0.0607511	-0.437072
[G].fINSPIVISPTTTVGEVkVMkR.[K]	P50094	IMD4	-1.22665	#N/A	-1.23942	#N/A	0.172393	#N/A	0.120792	#N/A	-0.334836	#N/A	<-3 sigma	#N/A	<-3 sigma	#N/A		#N/A		#N/A		#N/A	Yes
[G].fSGFPVTEDGkcPGk.[L]	P50094	IMD4	0.0798027	0.674689	-0.18301	-0.136806	0.0764625	0.138317	0.16779	0.0054727	-0.233817	0.0163421
[F].iNSPIVISPTTTVGEVkVMkR.[K]	P50094	IMD4	0.77229	1.14333	-0.138892	-0.230441	0.115065	0.174029	0.230255	-0.0927124	-0.201779	-0.0525339		>3 sigma
[G].lVNFPSSAVSLQTk.[L]	P50094	IMD4	-0.155766	1.63939	-0.128509	0.0152541	0.0120641	0.160884	0.13863	0.127816	-0.108769	0.00824181		>3 sigma
[G].aAIGTIEADkER.[L]	P50094	IMD4	0.276585	0.128277	0.0435384	-0.0678872	0.179959	0.0121851	0.215893	0.181098	-0.0351728	0.00907594
[S].fAIGLPNAPDLQAAR.[K]	P49090	ASN2	0.920553	-0.0340699	0.0339401	-0.223712	-0.0776801	0.118832	0.327619	0.103341	-0.210014	-0.126823
[R].lkFDALFPQkT.[V]	P49089	ASN1	0.995977	0	0.178425	0.190282	0.180181	-0.0247991	0.31979	-0.0859611	-0.0722661	-0.112892	>3 sigma
[Y].fTPDWLDEkR.[I]	P49090	ASN2	-0.434711	-0.297266	0.0714998	-0.109356	0.0870609	0.254173	0.347143	0.343087	-0.0544724	0.142425
[A].lFPQkTVADTVMR.[W]	P49089	ASN1	0.398466	0.0713738	0.0692154	0.4771	0.455516	0.0973	0.290826	-0.202787	-0.309632	-0.122299
[A].iGLPNAPDLQAAR.[K]	P49090	ASN2	-0.0675519	0.190094	0.197183	-0.194902	0.155871	-0.235235	0.132438	0.157396	0.0468827	0.12238
[Y].lYFAQAPSAAEFHTESVQR.[V]	P49090	ASN2	0.604669	0.977309	0.0134957	-0.0503392	0.135596	-0.129537	0.309249	-0.0295858	-0.139394	-0.0997344		>3 sigma
[F].aQAPSAAEFHTESVQR.[V]	P49090	ASN2	0.18316	0.235713	-0.160945	-0.214602	0.112715	0.0514873	0.149579	0.0770795	-0.0780327	-0.235033
[R].lkFDALFPQkTVADTVMR.[W]	P49089	ASN1	0.15375	-0.291053	-0.0372074	-1.23234	-0.0152315	-0.0739025	0.153725	0.126842	-0.372228	0.178144				<-3 sigma
[F].aIGLPNAPDLQAAR.[K]	P49090	ASN2	0.389702	0.0756996	0.284179	-0.137748	-0.00820386	0.0218348	0.341286	-0.0224404	-0.262924	0.0725176
[A].fDTTGEPDAkPYLPEEILWR.[Q]	P49089	ASN1	-0.0106955	#N/A	-0.12867	#N/A	-0.00783487	#N/A	0.138155	#N/A	-0.00493539	#N/A		#N/A		#N/A		#N/A		#N/A		#N/A
[T].lYDAkQDR.[I]	P49089	ASN1	-0.417214	0.444824	-0.201193	-0.024855	0.186746	0.0859629	0.1044	0.133764	-0.0575065	0.137069
[H].lVSnELEQLSSEALEAAR.[I]	P41805	RPL10	0.462382	0.820241	0.260913	0.079779	0.280077	0.380539	0.277776	0.111974	-0.109088	1.26062										>3 sigma
[R].aVPDSkIR.[I]	P41805	RPL10	0.39908	0.279154	-0.090586	-0.00825938	0.247737	0.0500297	0.28804	-0.0113186	-0.0540161	0.229016
[L].vSNELEQLSSEALEAAR.[I]	P41805	RPL10	0.0685548	1.3755	0.243343	-1.25393	0.13732	1.54953	-0.00666747	-0.103433	-0.220401	0.154971		>3 sigma		<-3 sigma		>3 sigma
[F].lSkkGSLEnNIR.[E]	P41805	RPL10	0.0482372	0.323522	-0.079318	-0.100723	0.0273346	-0.00248311	0.149869	0.0963716	-0.18178	0.012315
[M].lScAGADR.[L]	P41805	RPL10	0.088357	0.0589523	-0.207543	-0.222823	-0.0248902	0.00478074	0.199028	0.00391773	-0.186743	0.115317
[K].iILSkkWG.[F]	P41805	RPL10	0.10867	0.123519	-0.0931102	-0.104415	0.177142	0.155603	0.403085	0.101746	-0.127373	-0.0274649
[G].fTNLDRPEYLkkR.[E]	P41805	RPL10	0.426029	0.382575	-0.131469	-0.111234	-0.0542855	0.0211096	0.15587	0.101719	-0.246552	0.126866
[D].vVVEGLR.[R]	P41805	RPL10	-0.198239	0.161153	-0.028232	-0.0922542	0.259068	0.290014	0.231147	0.236025	-0.256129	0.190187
[N].lDRPEYLkkR.[E]	P41805	RPL10	0.193325	0.316665	-0.186301	-0.217848	0.175184	0.0753753	0.281626	0.251502	-0.115067	0.212928
[R].vDIGQIIFS.[V]	P41805	RPL10	0	#N/A	-1.67145	#N/A	0.527021	#N/A	-0.82977	#N/A	-0.382249	#N/A		#N/A	<-3 sigma	#N/A		#N/A	<-3 sigma	#N/A		#N/A
[Q].iIFSVR.[T]	P41805	RPL10	0.426357	#N/A	-0.273155	#N/A	-0.0596182	#N/A	0.0823149	#N/A	-0.00987721	#N/A		#N/A		#N/A		#N/A		#N/A		#N/A
[N].lLEDHSFINYkQNVETLDIVR.[K]	P19414	ACO1	0.338049	#N/A	0.332212	#N/A	0.455553	#N/A	-0.0877428	#N/A	-0.308475	#N/A		#N/A		#N/A		#N/A		#N/A		#N/A
[W].vVIGDENFGEGSSR.[E]	P19414	ACO1	0.814934	0.348235	0.621454	0.0230115	0.147771	-0.020703	0.134363	0.346876	-0.237549	0.173332
[K].lTGkMnGWTSPkDIILk.[L]	P19414	ACO1	1.01942	#N/A	0.569648	#N/A	0.273127	#N/A	0.285109	#N/A	-0.239267	#N/A	>3 sigma	#N/A		#N/A		#N/A		#N/A		#N/A
[C].vkNVYTGEYkGVPDTAR.[D]	P19414	ACO1	0.0583092	0.325187	-0.0723422	-0.0365927	0.107309	0.0585363	0.291786	-0.0489623	-0.289716	-0.0781056
[G].ikWVVIGDENFGEGSSR.[E]	P19414	ACO1	0.192213	-0.0327979	0.00779912	-0.0831697	0.112125	0.0944209	0.06857	0.166339	-0.221105	-0.116285
[T].iFTVTPGSEQIR.[A]	P19414	ACO1	-0.167659	-0.0133839	-0.272879	-0.166899	0.103526	-0.00201928	0.058633	-0.0305068	-0.104507	-0.0944572
[M].lkPPHGDGLPQR.[G]	P19414	ACO1	0.0160294	0.31528	0.157313	0.0208037	0.125889	0.133726	0.103149	-0.00795243	-0.355696	-0.129486
[N].vYTGEYkGVPDTAR.[D]	P19414	ACO1	-0.00412454	0.495576	0.19829	0.021067	0.105122	0.0440394	0.287094	-0.00649145	-0.0824215	0.168014
[L].iQAQVGGEkDLkR.[A]	P19414	ACO1	0.134503	0.176966	0.0503232	-0.0508744	0.0163769	0.241957	0.249243	0.0666201	-0.0812109	0.0734604
[G].lLPLNFkNPADYDkINPDDR.[I]	P19414	ACO1	0.77823	-0.750976	0.208128	0.285567	0.339731	0.100482	0.120659	-0.155141	-0.184632	0.0964034
[K].ikADEkk.[-]	P19414	ACO1	0.0755741	0.259313	0.0578246	-0.151904	0.0424097	0.0506933	0.400004	0.0758828	0.0299161	-0.0548458
[FT].vTPGSEQIR.[A]	P39533	ACO2	0.306549	0.333216	-0.0051568	0.0533327	-0.0229665	-0.00697028	-0.00749041	0.0367971	-0.0508228	0.19816
[T].iVSSYNR.[N]	P19414	ACO1	0.264687	0.073876	0.113491	-0.0167454	0.115961	0.00740324	0.120301	-0.066076	-0.110961	-0.0418566
[E].lAPGkPVTMR.[V]	P19414	ACO1	0.084349	0.157774	0.0935653	0.0580889	0.126477	0.0445374	0.189098	0.161409	-0.0807027	0.237003
[K].vSPTSDR.[L]	P19414	ACO1	-0.00952993	#N/A	0.0868867	#N/A	0.0187575	#N/A	0.374859	#N/A	0.22213	#N/A		#N/A		#N/A		#N/A		#N/A		#N/A
[N].vkGPVREnDILVLmESER.[E]	Q3E7X9	RPS28A	0.20196	0.254095	-0.0099642	-0.0938654	0.121351	-0.00610415	0.137848	0.0908418	-0.173809	0.0612339
[T].lAkVIkVLGR.[T]	Q3E7X9	RPS28A	-0.236943	0.249112	-0.143146	-0.182532	-0.265293	-0.161431	0.265743	0.0505275	-0.199798	0.0555864
[E].fLEDTSR.[T]	Q3E7X9	RPS28A	0.19446	0.307492	-0.0571643	-0.0141741	0.149427	0.0549536	0.197167	0.00500681	-0.122158	-0.0447919
[S].lFVVGVDNVSSQQMHEVR.[K]	P05317	RPP0	0.0334219	0.171393	-0.132094	-0.118192	0.0814754	0.0274761	0.261341	0.0571916	-0.229732	0.0395368
[G].aVAPEDIWVR.[A]	P05317	RPP0	0.119172	-0.0783944	0.0659379	0.0105709	0.057186	-0.0137149	0.25672	0.0840564	-0.0120382	0.0655178
[F].vVGVDNVSSQQmHEVR.[K]	P05317	RPP0	0.235211	0.660473	0.0507379	-0.124489	0.151529	-0.0149976	0.506914	-0.242354	-0.459112	-0.0966807
[G].fVFTNEPLTEIkNVIVSNR.[V]	P05317	RPP0	0.366466	0.382198	-0.0466003	-0.0221158	0.098018	-0.561208	0.120438	0.159048	-0.227247	-0.0989878
[F].vFTNEPLTEIkNVIVSNR.[V]	P05317	RPP0	0.152771	-0.473926	0.327214	-1.28271	-0.0279093	0.515109	0.249012	-0.073437	0.0021214	0.180224				<-3 sigma
[A].lGVPTkIAR.[G]	P05317	RPP0	-0.114685	0.486646	0.832251	0.234253	0.141495	-0.0540695	-0.0298354	-0.00382517	-0.23891	0.0250589
[F].vkGNVGFVFTNEPLTEIkNVIVSnR.[V]	P05317	RPP0	0	#N/A	-0.186425	#N/A	0.877008	#N/A	0.338898	#N/A	-0.389115	#N/A		#N/A		#N/A		#N/A		#N/A		#N/A
[P].lTEIkNVIVSNR.[V]	P05317	RPP0	-1.01315	#N/A	-0.366621	#N/A	0.0980355	#N/A	0.027812	#N/A	-0.089857	#N/A	<-3 sigma	#N/A		#N/A		#N/A		#N/A		#N/A
[A].iTGPVGkEcADLWPR.[V]	P0CX42	RPL23B	0.284039	0.203361	-0.091523	-0.0912615	0.0905978	-0.102039	0.114965	-0.0997977	-0.338506	-0.0367725
[S].lGDMVMATVkkGkPELR.[K]	P0CX42	RPL23B	0.956529	0.547683	0.012361	-0.138762	0.178911	0.0253163	0.275393	0.194402	-0.218213	0.0462849	>3 sigma
[N].lYIIAVkGSGSR.[L]	P0CX42	RPL23B	-0.0742691	0.264312	-0.263173	-0.0328708	-0.0319049	-0.049934	0.13935	-0.084975	-0.278935	0.0460623
[R].iSLGLPVGAImN.[C]	P0CX42	RPL23B	-0.378757	-0.0113999	0.419906	-0.190935	0.00900245	-0.206482	0.0580607	-0.0491155	-0.296928	0.200271
[N].cADNSGAR.[N]	P0CX42	RPL23B	0.104059	0.173284	-0.0690345	-0.442077	0.0632121	0.168164	0.414051	0.207795	-0.11151	0.301039
[Y].iIAVkGSGSR.[L]	P0CX42	RPL23B	0.0821621	0.0532571	-0.127955	-0.179408	-0.0495108	-0.0748662	0.0517633	0.0954712	-0.122276	0.105171
[A].aSLGDMVMATVkkGkPELR.[K]	P0CX42	RPL23B	0	#N/A	0.39477	#N/A	0.25387	#N/A	0.436684	#N/A	-0.364234	#N/A		#N/A		#N/A		#N/A		#N/A		#N/A
[R].iSLGLPVG.[A]	P0CX42	RPL23B	0	0	0	0	0	0	0	0	0	0
[R].iSLGLP.[V]	P0CX42	RPL23B	#N/A	0	#N/A	0	#N/A	0	#N/A	0	#N/A	0	#N/A		#N/A		#N/A		#N/A		#N/A
[K].vMPAIVVR.[Q]	P0CX42	RPL23B	0.0692568	#N/A	0.10125	#N/A	0.204637	#N/A	0.235061	#N/A	-0.0855223	#N/A		#N/A		#N/A		#N/A		#N/A		#N/A
[K].iFEGIPPPYDkkkR.[V]	P26785	RPL16B	0.185506	0.968849	0.0337141	-0.0756102	0.241127	0.102764	0.342651	0.258699	-0.406343	-0.150361		>3 sigma
[R].aFTkkVSSASAAASESDVAkQ.[L]	P26785	RPL16B	0.386821	0.460111	-0.0617603	0.00650925	0.174194	0.0938739	0.0889165	-0.0318659	-0.153719	0.111643
[K].lSTSVGWkYEDVVAkLEDkR.[K]	P26785	RPL16B	1.56852	1.66038	-0.0574882	0.0257394	0.353376	0.138902	0.199066	0.199537	-0.160782	-0.0956933	>3 sigma	>3 sigma									Yes
[T].lGkLSTSVGWkYEDVVAk.[L]	P26785	RPL16B	0.185949	#N/A	0.135097	#N/A	0.0965073	#N/A	0.240457	#N/A	-0.0283971	#N/A		#N/A		#N/A		#N/A		#N/A		#N/A
[S].vGWkYEDVVAk.[L]	P26785	RPL16B	0.159354	0.695512	-0.0378588	-0.0916489	-0.0221355	0.279421	0.233536	-0.0167695	-0.0819532	-0.0909577
[T].iAkQVLnGQkIVVVR.[A]	P26785	RPL16B	0.17735	0.300972	0.0559625	-0.0373075	0.0808551	0.0201999	0.125579	-0.00950832	-0.160936	0.038201
[M].sQPVVVIDAkDHLLGR.[L]	P26785	RPL16B	0.629843	0.368078	-0.000824832	-0.0603867	-0.076215	-0.0540697	0.233487	0.0784587	-0.196046	-0.0135362
[G].mVSHkTAR.[G]	P26785	RPL16B	0.118989	0.281001	-0.102169	-0.137443	0.237399	0.178548	0.191067	0.0862971	-0.0361985	0.217187
[K].vSSASAAASESDVAkQ.[L]	P26785	RPL16B	0.427342	0.215712	0.0158255	-0.018859	0.250562	0.0412211	0.363057	0.262504	-0.201539	-0.0896861
[S].vGWkYEDVVAkLEDkR.[K]	P26785	RPL16B	2.35052	1.55214	-0.0917845	-0.00711998	0.388151	0.00173155	0.298879	0.105228	0.0452729	-0.18279	>3 sigma	>3 sigma									Yes
[Q].vLnGQkIVVVR.[A]	P26785	RPL16B	0.2279	0.475351	0.0408751	-0.0652791	0.136575	0.0469294	0.232183	0.202207	-0.0242894	0.19183
[N].iSGEFFR.[N]	P26785	RPL16B	0.661028	-0.116239	-0.0543225	-0.180679	0.195889	0.00712774	0.12103	0.0877953	0.0138222	0.256961
[K].lkYHDFLR.[K]	P26785	RPL16B	0	0	0.0767726	0.302484	-0.00853029	1.29242	0.353648	-0.236291	-0.491302	0						>3 sigma
[Q].lASFGY.[-]	P26785	RPL16B	0	0	0	0	0	1.55127	-1.27918	0.0237345	-0.784093	0.796533						>3 sigma	<-3 sigma
[K].aTAFNkTR.[G]	P26785	RPL16B	0.215807	0.658159	-0.141113	-0.187879	0.166778	0.00331747	0.132637	0.228423	-0.0175677	0.548115
[F].vIGATNRPDQIDPAILRPGR.[L]	P25694	CDC48	0.0244084	0.607134	0.178553	-0.269114	0.200912	0.260478	-0.00839565	0.0149539	-0.237252	-0.0594487
[Q].lIYVPLPDEnAR.[L]	P25694	CDC48	0.182301	0.217539	0.100833	0.0363785	0.0749575	-0.0523379	0.118223	0.039874	-0.204103	-0.0934432
[Y].iTkEHFAEAMkTAkR.[S]	P25694	CDC48	0.0326495	#N/A	-0.0618354	#N/A	0.00883633	#N/A	0.279871	#N/A	-0.124587	#N/A		#N/A		#N/A		#N/A		#N/A		#N/A
[A].iIFIDEIDSIAPkRDkTnGEVER.[R]	P25694	CDC48	0.286027	0	-0.278399	-1.8089	0.17973	-0.555841	0.28705	-1.07079	-0.333192	0.206185				<-3 sigma				<-3 sigma
[F].lInGPEVMSkMAGESESNLR.[K]	P25694	CDC48	1.02344	0.851401	0.195879	-0.227248	-0.0617577	0.109003	0.145724	0.323542	-0.0287892	-0.0457315	>3 sigma
[A].iIFIDEIDSIAPkR.[D]	P25694	CDC48	0.268521	#N/A	-0.198909	#N/A	0.153124	#N/A	0.160381	#N/A	-0.220701	#N/A		#N/A		#N/A		#N/A		#N/A		#N/A
[A].ikDSIEAHR.[Q]	P25694	CDC48	0.273481	0.289981	0.0929698	0.00103181	0.123627	0.0879367	0.250122	0.0572521	-0.098999	-0.10658
[T].vVFLDELDSIAkAR.[G]	P25694	CDC48	-0.557762	0.00616208	0.0505703	-0.159428	0.0506383	0.0710042	0.193373	0.13764	-0.261334	0.0557085
[A].lGnSNPSALR.[E]	P25694	CDC48	0.357049	#N/A	0.179109	#N/A	0.16682	#N/A	0.392613	#N/A	-0.14194	#N/A		#N/A		#N/A		#N/A		#N/A		#N/A
[A].fGSNAEEDDDLYS.[-]	P25694	CDC48	0.15015	0.156891	0.144351	-0.315399	-0.00624139	-0.315714	0.049028	-0.198479	-0.13541	0.471088
[E].mVELPLR.[H]	P25694	CDC48	0.195582	#N/A	0.0914553	#N/A	-0.184269	#N/A	0.110909	#N/A	0.0217555	#N/A		#N/A		#N/A		#N/A		#N/A		#N/A
[Y].aIkDSIEAHR.[Q]	P25694	CDC48	-0.00518791	0.276858	-0.0656418	-0.0243687	0.155761	0.186814	0.127352	0.203944	-0.272579	-0.108629
[R].aVANETGAF.[F]	P25694	CDC48	0.17499	#N/A	0.287383	#N/A	0.0744953	#N/A	0.211503	#N/A	-0.0972925	#N/A		#N/A		#N/A		#N/A		#N/A		#N/A
[R].lSILNAQ.[L]	P25694	CDC48	0	-0.914506	-1.12895	0.327125	-1.21839	0	-1.9469	0.236217	-1.7128	0		<-3 sigma	<-3 sigma		<-3 sigma		<-3 sigma		<-3 sigma		Yes
[D].iFDkAR.[A]	P25694	CDC48	0.030736	#N/A	0.104727	#N/A	-0.0144395	#N/A	0.208456	#N/A	0.196576	#N/A		#N/A		#N/A		#N/A		#N/A		#N/A
[A].iGIkPPR.[G]	P25694	CDC48	0.643722	0.347209	0.107057	-0.117785	0.0529509	0.00331096	0.101968	0.013845	-0.258293	0.278121
[D].aWFPQkTAADTVMR.[W]	P49090	ASN2	0.0583558	0.104425	-0.0417532	-0.141369	-0.167736	0.0713334	0.280402	0.148604	-0.20684	0.212386
[K].aFDTTDEPDVkPYLPEEILWR.[Q]	P49090	ASN2	-0.112066	#N/A	-1.03507	#N/A	0.00964413	#N/A	-0.0881547	#N/A	0.047956	#N/A		#N/A	<-3 sigma	#N/A		#N/A		#N/A		#N/A
[M].fANPkADWGDDIPTTkEAYWYR.[L]	P49090	ASN2	-0.90527	#N/A	-0.218843	#N/A	0.11793	#N/A	0.160876	#N/A	-0.0718536	#N/A	<-3 sigma	#N/A		#N/A		#N/A		#N/A		#N/A
[R].lGTLVNQkTSA.[V]	P17076	RPL8A	0.0811532	0.424928	-0.0325804	-0.0805118	0.126061	0.0932258	0.207611	-0.00264191	-0.0424598	0.00107609
[S].aVAALTEVR.[A]	P17076	RPL8A	0.0317405	0.482512	0.201123	0.142336	0.0422361	0.063258	0.120917	0.0582801	-0.219805	0.115115
[T].lVNQkTSAVAALTEVR.[A]	P17076	RPL8A	0.000760544	-0.151862	-0.241095	-0.23055	-0.103578	0.0738863	0.0554268	0.0616996	-0.111787	-0.0947313
[R].lGTLVNQkTSAVAA.[L]	P17076	RPL8A	-0.0708749	0.36338	-0.103973	-0.0527077	0.161254	0.0869768	0.170005	0.178135	-0.0954568	-0.156523
[G].iGQAVQPkR.[N]	P17076	RPL8A	0.230209	0.249839	-0.0255577	-0.0318765	0.0569696	0.0304466	0.247235	0.03375	-0.223919	0.0115589
[K].vAPAPFGAkSTkSNkTR.[N]	P17076	RPL8A	0.21652	0.343728	-0.0576442	-0.0103231	0.199484	0.129837	0.262785	0.0878121	-0.153335	0.102051
[R].lGTLVNQkTSAVAALTEVR.[A]	P17076	RPL8A	0.0658722	#N/A	-0.0533804	#N/A	-0.060586	#N/A	0.105635	#N/A	-0.138985	#N/A		#N/A		#N/A		#N/A		#N/A		#N/A
[N].fGIGQAVQPkR.[N]	P17076	RPL8A	0.186559	0.259741	0.0301762	-0.0703894	0.1437	0.08487	0.115962	0.0442513	-0.19955	0.00509375
[SA].lIENkkAk.[L]	P17076	RPL8A	0.183293	0.450651	-0.195258	0.0908929	0.162975	0.134629	0.420787	0.167401	0.093407	0.259826
[Q].fQYTLDR.[N]	P17076	RPL8A	0.289255	-0.0392413	0.0957931	-0.251082	0.114026	0.0781603	0.189282	-0.0309358	-0.240663	0.101816
[Y].vkWPEYVR.[LV]	P17076	RPL8A	0.125309	0.224325	0.0492003	-0.0523552	0.273519	0.129202	0.204987	0.167987	-0.199211	0.159822
[E].lAELkVQk.[L]	P0CX84	RPL35A	0.16269	0.187043	-0.222085	-0.24918	0.157256	0.132731	0.31021	0.171765	-0.109785	0.0704127
[C].vLTVINEQQR.[E]	P0CX84	RPL35A	0.0916138	0.255769	-0.0251972	-0.0914438	-0.00939263	0.0379208	0.139972	0.0336513	-0.12436	0.0248352
[A].lTkFEASQVTEkQR.[K]	P0CX84	RPL35A	0.172117	0.326456	-0.145317	-0.149336	0.154965	0.0555176	0.247465	0.107244	-0.228284	0.0880843
[E].aSQVTEkQR.[K]	P0CX84	RPL35A	0.143777	0.154278	-0.0391587	-0.0746539	0.108211	0.133553	0.0925626	0.156184	-0.06583	0.20695
[K].fEASQVTEkQR.[K]	P0CX84	RPL35A	0.0217691	0.247806	-0.104127	0.0254501	-0.0094406	0.0936615	0.187192	0.0110485	-0.0793391	-0.0188213
[Q].lVDLkkELAELkVQk.[L]	P0CX84	RPL35A	0.578073	#N/A	0.0136636	#N/A	0.187864	#N/A	0.259842	#N/A	-0.353779	#N/A		#N/A		#N/A		#N/A		#N/A		#N/A
[M].aGVkAYELR.[T]	P0CX84	RPL35A	0.151033	0.0855029	0.0936422	-0.136157	-0.0793249	-0.0236076	0.0734434	0.0792778	-0.144677	0.0371773
[V].lTVINEQQR.[E]	P0CX84	RPL35A	0.162149	0.163014	0.00987401	-0.0886514	0.119612	0.0389952	0.0999342	0.0225018	-0.0517803	0.186455
[K].lSRPSLPkIkT.[V]	P0CX84	RPL35A	0.14169	#N/A	-0.198726	#N/A	0.192697	#N/A	0.181537	#N/A	-0.0864601	#N/A		#N/A		#N/A		#N/A		#N/A		#N/A
[K].lSRPSLPkIkTVR.[K]	P0CX84	RPL35A	0.687101	1.22454	-0.0600226	-0.0688665	-0.0480012	-0.118473	0.262704	0.0321336	-0.285132	-0.276956		>3 sigma
[Q].lASQLVDLkkELAELkVQk.[L]	P0CX84	RPL35A	-0.484922	#N/A	0.200551	#N/A	-0.0861188	#N/A	0.384301	#N/A	-0.142226	#N/A		#N/A		#N/A		#N/A		#N/A		#N/A
[T].vInEQQR.[E]	P0CX84	RPL35A	0.0196473	0.0985703	-0.0832613	-0.0821429	0.105177	0.0869831	0.176487	0.194941	0.00342055	0.00941554
[K].lSRPSLPk.[I]	P0CX84	RPL35A	0.0293509	0.164459	-0.158381	-0.111456	0.11024	0.162055	0.348099	1.29118	-0.0981418	-0.000109411								>3 sigma
[A].gVkAYELR.[T]	P0CX84	RPL35A	0.0262915	#N/A	-0.229875	#N/A	-0.391988	#N/A	-0.0126134	#N/A	-0.215359	#N/A		#N/A		#N/A		#N/A		#N/A		#N/A
[Q].lVDLkkELAELk.[V]	P0CX84	RPL35A	-0.0860305	#N/A	-0.249919	#N/A	0.663326	#N/A	0.244271	#N/A	-0.487966	#N/A		#N/A		#N/A		#N/A		#N/A		#N/A
[A].vAEVFTGIPGkLVR.[L]	P00830	ATP2	-0.0832553	#N/A	-0.108205	#N/A	0.202682	#N/A	0.27507	#N/A	-0.192664	#N/A		#N/A		#N/A		#N/A		#N/A		#N/A
[H].lDATTVLSR.[G]	P00830	ATP2	-0.109688	#N/A	0.0114768	#N/A	0.12369	#N/A	0.220467	#N/A	-0.133605	#N/A		#N/A		#N/A		#N/A		#N/A		#N/A
[T].iAMDGTEGLVR.[G]	P00830	ATP2	0.310544	#N/A	-0.200332	#N/A	-0.162888	#N/A	0.0575848	#N/A	-0.307695	#N/A		#N/A		#N/A		#N/A		#N/A		#N/A
[N].vIGEPIDER.[G]	P00830	ATP2	0.0272944	0.192619	-0.0671146	0.0297947	0.192299	-0.0383533	0.129099	0.0634681	-0.360849	0.0346713
[F].aVAEVFTGIPGkLVR.[L]	P00830	ATP2	0.352347	#N/A	0.234866	#N/A	0.194735	#N/A	0.166346	#N/A	-0.427159	#N/A		#N/A		#N/A		#N/A		#N/A		#N/A
[G].iSELGIYPAVDPLDSkSR.[L]	P00830	ATP2	0.467681	0.270171	-0.23112	-0.186894	0.264536	0.317498	0.30962	-0.0933698	-0.246565	0.0973087
[Y].mVGGIEDVVAkAEk.[L]	P00830	ATP2	-0.00445056	0.204483	-0.0199669	-0.213527	0.10459	-0.116117	0.341086	0.157443	-0.230158	0.0063758
[M].vGGIEDVVAkAEk.[L]	P00830	ATP2	-0.0876288	0.150218	-0.0225104	0.23767	0.0590233	-0.0863281	0.16648	0.318087	-0.104639	0.000154368
[R].iINVIGEPIDER.[G]	P00830	ATP2	-0.021008	0.08579	-0.0270115	-0.0180496	0.18409	-0.220366	0.227978	-0.254751	-0.13738	-0.0623569
[E].lGIYPAVDPLDSkSR.[L]	P00830	ATP2	0.00325741	0.187956	-0.0222547	-0.17429	0.0382169	0.0262592	0.533551	-0.0266244	-0.164523	-0.220611
[G].iYPAVDPLDSkSR.[L]	P00830	ATP2	0.298828	0.155898	0.0254092	0.0287053	0.145181	0.0449174	0.275602	0.0927728	-0.245298	0.282716
[G].lTIAEYFR.[D]	P00830	ATP2	0.214457	0.335231	0.0283328	-0.223632	0.153433	0.179655	0.131435	0.0974691	-0.234636	0.170452
[A].lVFGQMNEPPGAR.[A]	P00830	ATP2	0.414994	-0.11497	-0.476877	0.245147	0.431776	-0.180724	-0.275398	0.0436399	-0.220595	-0.330149
[P].fAVAEVFTGIPGkLVR.[L]	P00830	ATP2	-0.134031	#N/A	0.00912765	#N/A	0.102028	#N/A	0.298197	#N/A	-0.425695	#N/A		#N/A		#N/A		#N/A		#N/A		#N/A
[S].vFTGVGER.[T]	P00830	ATP2	-0.00575484	#N/A	-0.0252435	#N/A	0.15079	#N/A	0.300572	#N/A	-0.260554	#N/A		#N/A		#N/A		#N/A		#N/A		#N/A
[E].vFTGIPGk.[L]	P00830	ATP2	0.155048	#N/A	-0.0890915	#N/A	0.01747	#N/A	0.381202	#N/A	-0.110009	#N/A		#N/A		#N/A		#N/A		#N/A		#N/A
[F].iDNIFR.[F]	P00830	ATP2	-0.108643	#N/A	-0.0340785	#N/A	0.0313079	#N/A	0.263107	#N/A	-0.13057	#N/A		#N/A		#N/A		#N/A		#N/A		#N/A
[T].iAEYFR.[D]	P00830	ATP2	-0.137697	#N/A	-0.0749939	#N/A	-0.0211435	#N/A	0.015247	#N/A	0.000264251	#N/A		#N/A		#N/A		#N/A		#N/A		#N/A
[H].vINVGkTWEk.[L]	P32905	RPS0A	0.0358668	0.287231	-0.0536994	-0.229349	-0.00900735	0.0731603	0.0428605	0.33823	0.0316516	-0.210767
[L].lAANTHLGAR.[N]	P32905	RPS0A	0.407702	0.169022	-0.0414466	-0.221683	-0.0160312	0.0383569	0.0267457	0.0428404	0.228422	0.0965667
[R].iIAAIPNPEDVVAISSR.[T]	P32905	RPS0A	1.14065	0.582536	-0.00434722	0.110118	0.120901	-0.0934354	0.117951	-0.14876	-0.0686518	0.12041	>3 sigma
[A].lTDLDSPSEFVDVAIPcnNR.[G]	P32905	RPS0A	0.810425	#N/A	-0.58531	#N/A	0.0565967	#N/A	0.0694123	#N/A	-0.116349	#N/A		#N/A		#N/A		#N/A		#N/A		#N/A
[F].aAHTGATPIAGR.[F]	P32905	RPS0A	0.372706	0.1379	-0.0757667	0.0834987	0.270769	0.183969	0.172501	0.131556	-0.0691915	0.00274889
[S].iMPDLYFYR.[DN]	P32905	RPS0A	0.324574	0.650284	-0.37925	-0.0653894	-0.137134	-0.0325758	-0.0211337	0.199554	-0.0593893	-0.00310061
[K].fAAHTGATPIAGR.[F]	P32905	RPS0A	0.378677	0.814597	0.0614496	-0.0500776	0.158909	0.132197	0.190003	0.0759678	-0.10358	0.071286
[L].lLAANTHLGAR.[N]	P32905	RPS0A	0.257927	0.128906	0.145993	-0.089419	-0.118288	0.0990191	-0.00872617	0.0252322	-0.0637541	0.236204
[R].iIAAIPNPEDVVA.[I]	P32905	RPS0A	0.307743	0.592572	-0.104123	-0.256694	0.225727	0.289957	0.0984715	0.055083	-0.110307	-0.376971
[R].lVIVTDPR.[SL]	P32905	RPS0A	0.0624007	0.184858	0.0157245	-0.0736053	0.185955	-0.0141656	0.181907	0.0434129	0.0339812	0.0986675
[K].fAAHTGATP.[I]	P32905	RPS0A	0.1065	0.447262	-0.00361296	-0.212623	-0.171558	0.113503	0.0656592	0.224192	-0.0845718	-0.18423
[L].lSAPLSkELR.[A]	P05743	RPL26A	-0.133286	0.465675	-0.0700736	0.146296	-0.0103951	-0.238276	0.0199007	-0.186346	-0.395731	0.0162877
[A].vqVDkVTkEkVNGASVPInLHPSk.[L]	P05743	RPL26A	0.0754559	#N/A	0.00220318	#N/A	0.273482	#N/A	0.494542	#N/A	-0.172641	#N/A		#N/A		#N/A		#N/A		#N/A		#N/A
[N].lHPSkLVITk.[L]	P05743	RPL26A	-0.175093	0.378816	-0.0264881	-0.0912372	0.234593	0.113923	0.319073	0.118943	-0.0295038	0.127212
[G].aSVPINLHPSkLVITk.[L]	P05743	RPL26A	-0.414767	0.661421	0.295801	-0.249877	0.103121	-0.0561427	0.386499	0.00633881	-0.171751	-0.144864
[K].vnGASVPINLHPSkLVITk.[L]	P05743	RPL26A	0.438424	#N/A	-0.0415098	#N/A	-0.0657797	#N/A	0.49131	#N/A	-0.279167	#N/A		#N/A		#N/A		#N/A		#N/A		#N/A
[V].lLSAPLSkELR.[A]	P05743	RPL26A	0.105176	0.387382	0.0971616	0.0524872	0.229845	-0.137071	0.241198	-0.395072	-0.260901	0.22797
[M].akQSLDVSSDR.[R]	P05743	RPL26A	0.335447	0.0611471	-0.0972479	-0.451403	-0.0230925	-0.221308	0.0429567	-0.0586599	-0.215324	-0.0126045
[M].akQSLDVSSDRR.[K]	P05743	RPL26A	0.101782	-0.00156145	-0.00352188	-0.31863	-0.0289343	-0.102134	0.00390539	-0.0371152	-0.139771	0.0536437
[K].lHLDkDR.[K]	P05743	RPL26A	0.233405	0.0707972	-0.196144	-0.407418	-0.132607	0.121749	0.150715	0.0828297	-0.147876	0.263847
[S].lDVSSDRR.[K]	P05743	RPL26A	0.457565	0.406327	-0.0158479	0.0618469	0.161514	0.0681385	0.2475	0.0355184	-0.178713	-0.0698267
[Y].fTAPSSQR.[R]	P05743	RPL26A	0.351222	0.221624	-0.00758381	-0.0710317	0.0175142	0.0039727	0.142689	-0.016733	-0.170277	0.106019
[R].VLLSAPLSkE.[L]	P05743	RPL26A	0.300141	0.0805741	-0.116692	-0.0164029	-0.152659	0.228047	0.0482087	0.0174393	-0.137372	0.0999358
[F].tAPSSqR.[R]	P05743	RPL26A	0.0686766	0.284972	0.0250705	0.115852	0.080224	0.148138	0.205698	0.0185146	-0.0936764	-0.185833
[S].lDVSSDR.[R]	P05743	RPL26A	0.0292508	0.0697717	-0.0605844	-0.0114485	0.180512	0.0692329	0.174339	0.121125	-0.0570122	0.0141686
[A].kQSLDVSSDRR.[K]	P05743	RPL26A	0.0356062	#N/A	-0.446219	#N/A	0.0335425	#N/A	-0.0701416	#N/A	-0.206498	#N/A		#N/A		#N/A		#N/A		#N/A		#N/A
[G].ikALPIR.[R]	P05743	RPL26A	0.322407	0.298682	-0.082107	0.142626	-0.0719467	-0.0483652	0.0267206	-0.128404	-0.185887	0.106287
[RK].vLLSAP.[L]	P05743	RPL26A	0	0	0.027977	0	0	1.47175	0	0	0	0						>3 sigma
[F].tAPSSER.[R]	P53221	RPL26B	0.0686766	#N/A	0.0250705	#N/A	0.080224	#N/A	0.205698	#N/A	-0.0936764	#N/A		#N/A		#N/A		#N/A		#N/A		#N/A
[Y].fTAPSSER.[R]	P53221	RPL26B	0.384008	0.3059	-0.013545	0.0179448	-0.0169591	0.0332372	0.133371	0.0738413	-0.1078	0.273548
[K].lFSEQTLDDNkkVR.[E]	P26637	CDC60	0.409965	0.5333	0.0846811	-0.158168	0.232469	-0.0116842	0.176245	0.0720743	-0.178969	0.0955386
[R].lANEkPEDVFERE.[L]	P26637	CDC60	-0.0527019	0.25557	-0.0281917	-0.0835434	0.147238	0.134313	0.232518	0.0774198	-0.0998021	-0.333811
[K].lFSEQTLDDNkk.[V]	P26637	CDC60	0.392141	0.401324	-0.0664835	-0.112831	0.264142	0.103882	0.318268	0.132239	-0.235513	-0.230449
[EN].lLAEAkk.[RNI]	Q12165	ATP16	0.0301422	0.146484	-0.157531	-0.0275678	0.133548	0.0281401	0.268354	0.112976	-0.0846945	0.486863
[K].iWAEEHQFEIDAPSIEDEPITMDSEELHR.[T]	P26637	CDC60	-0.517284	#N/A	-0.0903256	#N/A	-0.331668	#N/A	-0.0190578	#N/A	-0.210041	#N/A		#N/A		#N/A		#N/A		#N/A		#N/A
[M].iAAGEAFVYNEPESQVMSR.[S]	P26637	CDC60	0.676765	0.784066	-0.00288401	-0.143312	-0.0671729	-0.0900237	0.0178532	-0.00528243	-0.0601968	0.213123
[E].lQFSEIDTVkAAAR.[N]	P26637	CDC60	0.0443416	0.301272	0.398591	0.0178669	0.0420056	-0.0749723	0.0560415	0.0465216	-0.218128	0.130848
[A].iSFPYGAkTGkDIFTGEEVEIPPVTk.[I]	P26637	CDC60	0	#N/A	0.471593	#N/A	-0.0802733	#N/A	-0.0875412	#N/A	-0.33592	#N/A		#N/A		#N/A		#N/A		#N/A		#N/A
[K].iAYkEDYYTGTM.[I]	P26637	CDC60	0.0180308	0.156935	-0.00439016	-0.0309754	0.222196	0.0909048	0.216404	0.244632	-0.133458	-0.22219
[K].iVEnAVPGNPGVVFQNI.[-]	P26637	CDC60	0.311721	0	1.50256	0.447499	0.457379	-0.856463	-0.0312227	-0.121951	0.0791731	-1.19924			>3 sigma			<-3 sigma				<-3 sigma
[L].iAIEkkYQk.[I]	P26637	CDC60	-0.189186	#N/A	-0.0579191	#N/A	0.120227	#N/A	0.259716	#N/A	-0.0597013	#N/A		#N/A		#N/A		#N/A		#N/A		#N/A
[T].lEQTVEk.[F]	P26637	CDC60	0.290666	-0.0680472	0.0148776	0.0553049	-0.100617	0.0663543	0.288244	0.311038	-0.0811155	-0.239812
[G].vLAALDYLR.[N]	P26637	CDC60	0.866104	#N/A	0.216712	#N/A	-0.0473074	#N/A	0.279139	#N/A	0.0792371	#N/A		#N/A		#N/A		#N/A		#N/A		#N/A
[A].lIAIEkkYQk.[I]	P26637	CDC60	0.443619	#N/A	0.0868075	#N/A	0.211871	#N/A	0.472002	#N/A	-0.416168	#N/A		#N/A		#N/A		#N/A		#N/A		#N/A
[K].iQSPkDkN.[L]	P26637	CDC60	0.0723098	0.274747	-0.281829	-0.0532071	-0.036336	0.23012	0.408305	0.201974	0.15111	0.29429
[F].mTLEQTVEkFGADAAR.[I]	P26637	CDC60	0.263818	0.56658	-0.099409	0.107528	0.103318	0.00942843	0.0869936	0.0631377	0.0323348	-0.106768
[G].vVFQNI.[-]	P26637	CDC60	0	0	0.295049	0	-0.122502	-0.25797	0	0.980531	-0.162457	0								>3 sigma
[G].fAGFPVTTDGkR.[N]	P38697	IMD2	0.160619	0.40228	-0.0988793	-0.0970226	0.144577	0.0166795	0.267136	-0.148462	-0.333702	0.0452524
[K].lVGVITSR.[D]	P38697	IMD2	-0.0726191	-1.42266	-0.0841068	-0.1769	0.112767	-0.0270303	0.0694161	0.0923772	0.0292289	0.000733275		<-3 sigma
[G].lVDFASSEVSLQTkLTR.[N]	P38697	IMD2	-0.0191353	#N/A	0.122316	#N/A	-0.465157	#N/A	0.457108	#N/A	-0.12358	#N/A		#N/A		#N/A		#N/A		#N/A		#N/A
[R].lDAQAIkE.[A]	P46654	RPS0B	0.0612408	0.238385	0.166336	-0.0143124	0.18671	-0.0651359	0.177492	0.133912	-0.0715967	0.095628
[R].LDAQAIkEASY.[V]	P46654	RPS0B	0.0913397	0.150158	0.00454488	0.133723	0.0513306	0.113598	0.0965576	0.0242707	0.0560712	0.132718
[A].sTkAQPTEVSSILEER.[I]	P07251	ATP1	-0.238994	0.277449	-0.459003	-0.539857	-0.308309	-0.148758	-0.191972	-0.329521	-0.516183	-0.423882
[L].aSTkAQPTEVSSILEER.[I]	P07251	ATP1	0.328076	0.439245	-0.00363171	-0.00439079	0.290195	0.176312	0.257195	0.278202	-0.0185177	0.196888
[G].vnGHLDGIELSR.[I]	P07251	ATP1	0.260687	0.772756	-0.0150846	0.0727746	0.148406	0.201134	0.243366	0.145347	-0.0571234	-0.45454
[T].aVALDTILNQkR.[W]	P07251	ATP1	0.176991	0.533626	0.122944	-0.252505	-0.0316979	0.0376373	-0.046708	-0.198902	0.047402	-0.261555
[G].lkAVDALVPIGR.[G]	P07251	ATP1	0.461142	0.664195	-0.0263618	-0.247538	-0.0580123	0.0675155	0.0824893	0.136665	-0.0217732	-0.0239864
[G].vSDEANLNETGR.[V]	P07251	ATP1	0.176381	0.126975	0.025098	-0.33543	0.51172	0.0907818	0.23816	0.0789527	-0.129654	0.837111
[P].lATEEQVPLIYAGVnGHLDGIELSR.[I]	P07251	ATP1	-0.196135	#N/A	-0.056864	#N/A	0.251037	#N/A	0.0655146	#N/A	-0.346521	#N/A		#N/A		#N/A		#N/A		#N/A		#N/A
[R].lVkEGELVkR.[T]	P07251	ATP1	0.1468	0.330436	-0.156323	-0.0829977	0.0275173	0.110529	0.170566	0.651543	-0.366195	0.104157
[Q].vkAPGILPR.[R]	P07251	ATP1	-0.0248512	0.242052	-0.0848324	-0.142021	0.17559	0.0245052	0.263996	0.13933	-0.0935687	-0.116889
[A].vALDTILNQkR.[W]	P07251	ATP1	0.476862	0.363267	-0.126449	-0.231351	0.245151	0.477427	-0.0253967	0.084137	-0.195823	-0.0500172
[D].lkFPLPHR.[V]	P0CX23	RPL20A	0.319204	0.521776	-0.0715132	-0.0946287	0.26361	0.0239636	0.249429	0.00115277	-0.171143	0.181335
[R].iFASNEVIAkSR.[Y]	P0CX23	RPL20A	0.122304	#N/A	0.00561676	#N/A	0.296047	#N/A	0.222554	#N/A	0.0869356	#N/A		#N/A		#N/A		#N/A		#N/A		#N/A
[K].vAEIEkTADVkR.[Q]	P0CX23	RPL20A	-0.0281136	0.264921	0.0352065	-0.0414954	0.162724	0.0910585	0.314066	0.0245088	-0.0805449	0.254125
[R].vAAVETLYQDMAAR.[H]	P0CX23	RPL20A	0.81278	0.650852	-0.0428315	-0.240158	-0.0250394	0.177696	0.242966	0.388318	-0.050783	0.336887
[F].lTkDLkFPLPHR.[V]	P0CX23	RPL20A	0.561255	0.218046	-0.028916	-0.139102	-0.107886	-0.0725629	0.169178	0.0414807	-0.197568	0.0575295
[I].fASNEVIAkSR.[Y]	P0CX23	RPL20A	0.164208	0.427377	-0.0294723	-0.189361	0.251274	0.0534944	0.347923	0.360561	-0.223644	-0.135994
[M].aHFkEYQVIGR.[R]	P0CX23	RPL20A	0.275987	0.123837	-0.120848	-0.174391	0.0198115	-0.0239347	0.113786	-0.0237711	-0.241894	0.0012176
[T].lYQDMAAR.[H]	P0CX23	RPL20A	0.141801	0.16097	-0.0296519	-0.0082648	0.152093	0.0514754	0.105494	0.0327267	-0.0230559	0.125175
[Q].fLTkDLkFPLPHR.[V]	P0CX23	RPL20A	1.42183	-0.267186	0.260542	-0.269482	0.0106561	0.337354	0.0588246	0.186584	-0.0244806	-0.00932372	>3 sigma
[H].iLkVAEIEkTADVkR.[Q]	P0CX23	RPL20A	0.401737	1.16243	0.0287132	-0.238487	0.15558	0.169426	0.367064	0.23429	-0.163681	-0.251226		>3 sigma
[M].fAAnGMPkVNQGAEEDVR.[I]	P32449	ARO4	0.203615	0.320466	-0.111209	-0.0969869	0.165938	0.0267006	0.176576	-0.00345233	-0.0841633	0.0159057
[D].lVSFGAIGAR.[T]	P32449	ARO4	-0.35513	0.418039	-0.252007	-0.12138	-0.315791	-0.0742424	0.12974	0.0350181	-0.113454	0.0393143
[C].iGWETTEDVLR.[K]	P32449	ARO4	-0.0737079	-0.016454	0.0873208	-0.0946697	0.162614	-0.0971936	0.283396	0.226532	-0.206059	-0.139246
[L].lQVQIPATPTSLETAkR.[G]	P32449	ARO4	0.599734	0.691788	0.0395736	-0.0064513	0.199608	0.260456	0.193387	0.175033	-0.129257	-0.193947
[G].lINDPDVNNTFNINkGLQSAR.[Q]	P32449	ARO4	-0.0618956	0.196277	-0.27545	0.224859	0.125679	0.450755	0.140187	0.247654	-0.248921	-0.16755
[A].lLQVQIPATPTSLETAkR.[G]	P32449	ARO4	-0.0702735	0.908217	0.0678988	0.0177328	0.250598	0.163377	0.237675	0.203467	-0.108455	-0.149112
[K].vNQGAEEDVR.[I]	P32449	ARO4	0.0773515	-0.161406	0.116782	0.132811	0.103431	0.0882793	0.156643	-0.183973	-0.00105344	-0.202437
[N].gMPkVNQGAEEDVR.[I]	P32449	ARO4	0.0345993	0.404104	0.138748	-0.13043	0.109849	-0.0573374	0.189904	0.135167	-0.160956	-0.0972385
[T].fkQSSPANPIGTYEYSR.[S]	P31373	CYS3	-0.105955	0.697927	0.229587	-0.092832	0.303605	-0.00183361	0.211827	0.289339	-0.179485	0.209872
[G].vLATnNkPLYER.[L]	P31373	CYS3	0.492474	0.195864	0.00720181	-0.105885	0.0321348	0.0402875	0.159444	0.0651137	-0.187837	0.0863511
[S].lLEVPAVMTHGGIPkEAR.[E]	P31373	CYS3	-0.749408	1.00623	0.540351	0.060705	-0.0619059	0.225841	0.0227906	0.226846	0.108579	0.0865597		>3 sigma
[P].iSLSTTFkQSSPANPIGTYEYSR.[S]	P31373	CYS3	-0.151799	0.0632629	0	1.32685	0.207893	0.119078	0.0257639	-0.181792	-0.161525	-0.256529				>3 sigma
[R].ikGGAEAASk.[F]	P31373	CYS3	0.14511	0.539387	-0.100603	-0.0644621	0.1598	-0.00806327	0.220844	0.0953887	-0.185157	0.167838
[A].iGAIPSPFDAWLTHR.[G]	P31373	CYS3	0	#N/A	-0.0244863	#N/A	1.72435	#N/A	-0.252303	#N/A	-0.239361	#N/A		#N/A		#N/A	>3 sigma	#N/A		#N/A		#N/A
[T].lkVTDIQk.[V]	P31373	CYS3	0.403488	0.317579	0.168744	-0.085642	0.130557	0.0558463	0.218644	0.160193	-0.275039	-0.114608
[K].lVWIETPTNPT.[L]	P31373	CYS3	0.297147	-0.968909	0.000587469	-0.185609	0.156396	0.166697	0.145451	0.136035	0.016237	-0.0199		<-3 sigma
[K].gGAEAASk.[F]	P31373	CYS3	0.162195	0.255224	0.0188936	0.0631393	-0.0188866	-0.208074	0.276401	0.164783	-0.107454	0.149938
[P].iGTYEYSR.[S]	P31373	CYS3	0.331787	0.0287792	-0.047968	-0.17602	0.0590891	-0.125096	0.0471744	-0.0280635	-0.0957856	-0.197198
[A].fQSAYPEFSR.[W]	P32471	EFB1	0.154922	-0.137561	0.037256	0.125937	0.123979	0.0513603	0.093236	-0.046013	-0.167409	0.193152
[S].lADkSYIEGTAVSQADVTVFk.[A]	P32471	EFB1	-0.84584	#N/A	0.402746	#N/A	0.162265	#N/A	-0.148682	#N/A	0.174801	#N/A	<-3 sigma	#N/A		#N/A		#N/A		#N/A		#N/A
[K].aAkPAkPAAkS.[I]	P32471	EFB1	0.00390249	0.233947	-0.0555319	-0.0448344	0.0762951	0.152662	0.489714	0.0920539	-0.183083	-0.116428
[C].vVEDDkVSLDDLQQSIEEDEDHVQSTDIAAMQkL.[-]	P32471	EFB1	1.23502	2.09888	-0.187147	-0.27246	-0.0336554	0.147749	0.176904	0.452938	-0.417426	1.10061	>3 sigma	>3 sigma								>3 sigma	Yes
[T].lDVkPWDDETNLEEMVANVk.[A]	P32471	EFB1	0.312621	#N/A	0.273007	#N/A	-0.159774	#N/A	0.242817	#N/A	-0.216876	#N/A		#N/A		#N/A		#N/A		#N/A		#N/A
[G].lTWGAHQFIPIGFGIkk.[L]	P32471	EFB1	0	#N/A	0.893932	#N/A	-0.106625	#N/A	0.213228	#N/A	-0.22263	#N/A		#N/A		#N/A		#N/A		#N/A		#N/A
[R].IAAYNAkkAAkPAkPAAkS.[I]	P32471	EFB1	0.141491	#N/A	-0.0067077	#N/A	0.0902244	#N/A	0.200054	#N/A	-0.156755	#N/A		#N/A		#N/A		#N/A		#N/A		#N/A
[S].lADkSYIEGTAVSQADVTVFkAFQSAYPEFSR.[W]	P32471	EFB1	0	#N/A	-0.224976	#N/A	0.334534	#N/A	-0.406029	#N/A	-0.0661423	#N/A		#N/A		#N/A		#N/A		#N/A		#N/A
[R].iAAYnAkk.[A]	P32471	EFB1	-0.206707	0.124228	-0.138847	-0.0943958	0.148402	0.0587168	0.274056	0.108102	-0.048166	0.0558918
[Q].fIPIGFGIkk.[L]	P32471	EFB1	-0.406245	0.179964	-0.125192	-0.2247	-0.0773177	0.173433	0.291713	0.294403	-0.136361	0.131191
[G].aHQFIPIGFGIkk.[L]	P32471	EFB1	0	#N/A	0.129822	#N/A	0.327306	#N/A	0.00491015	#N/A	0.25377	#N/A		#N/A		#N/A		#N/A		#N/A		#N/A
[R].IAAYNAkkA.[A]	P32471	EFB1	-0.0406953	#N/A	-0.157719	#N/A	0.0413462	#N/A	0.2929	#N/A	-0.179985	#N/A		#N/A		#N/A		#N/A		#N/A		#N/A
[K].aFQSAYPE.[F]	P32471	EFB1	0.277373	0.318184	0.080374	-0.217036	0.292963	-0.135681	0.0965931	-0.202333	-0.112626	-0.235322
[K].iQkSVYDVLR.[T]	P34167	TIF3	0.160094	0.231544	0.0628802	-0.32204	0.184407	-0.0610422	0.223364	-0.326352	-0.22872	0.0453311
[Q].lTVEDGDNWEVVGkk.[-]	P34167	TIF3	0.172303	#N/A	-0.0303751	#N/A	0.200951	#N/A	0.239041	#N/A	-0.13406	#N/A		#N/A		#N/A		#N/A		#N/A		#N/A
[S].lTNkkTTDEQPk.[I]	P34167	TIF3	0.0165344	0.27122	-0.190837	-0.180148	0.190189	-0.00105134	0.121858	0.154975	-0.236116	0.489197
[S].fLNDDTFGSSWAEEDVDLNk.[I]	P34167	TIF3	0.106301	#N/A	-0.0822603	#N/A	0.132786	#N/A	0.0878377	#N/A	0.437839	#N/A		#N/A		#N/A		#N/A		#N/A		#N/A
[K].iTIPIETANANTIPLSE.[L]	P34167	TIF3	-0.984451	#N/A	-0.482902	#N/A	-0.0495712	#N/A	0.085548	#N/A	-0.623564	#N/A	<-3 sigma	#N/A		#N/A		#N/A		#N/A		#N/A
[N].fQGSSRPPR.[R]	P34167	TIF3	0.0158995	-0.120501	-0.00213579	-0.197333	0.145102	0.160347	0.240827	-0.0465784	0.209894	-0.045876
[L].aHAkNnSnNTR.[S]	P34167	TIF3	0.326873	-0.115747	-0.00073763	0.289483	0.659167	0.502216	0.380137	0.170263	-0.0631226	-0.0369258
[K].fnGTkLNER.[T]	P34167	TIF3	0.125455	#N/A	-0.168277	#N/A	0.0856929	#N/A	0.227001	#N/A	-0.161174	#N/A		#N/A		#N/A		#N/A		#N/A		#N/A
[A].lGGGSSDR.[R]	P34167	TIF3	0.141211	0.193167	-0.0686463	-0.111628	0.112514	0.0653258	0.221866	0.0333041	-0.169839	0.047478
[N].fQSSSRPPRR.[E]	P34167	TIF3	0.252596	0.215479	0.127697	-0.0582746	0.150942	0.151224	-0.0265736	0.128645	-0.153655	-0.198188
[DA].lDWGAAR.[G]	P34167	TIF3	0.256222	#N/A	0.0214045	#N/A	0.288727	#N/A	0.117291	#N/A	-0.248255	#N/A		#N/A		#N/A		#N/A		#N/A		#N/A
[DK].lVAVLk.[F-]	P34167	TIF3	-0.240542	#N/A	-0.400967	#N/A	-0.19018	#N/A	0.0735055	#N/A	0.0297598	#N/A		#N/A		#N/A		#N/A		#N/A		#N/A
[S].vYDVLR.[T]	P34167	TIF3	-0.11984	0.241423	-0.0957145	-0.150589	0.247821	0.328953	0.0210678	0.0778493	-0.307872	0.0180988
[G].vISEDSVLPNAIDDLGR.[F]	P09436	ILS1	0.228866	#N/A	0.173503	#N/A	0.357786	#N/A	0.125601	#N/A	-0.392625	#N/A		#N/A		#N/A		#N/A		#N/A		#N/A
[C].lknGVISEDSVLPNAIDDLGR.[F]	P09436	ILS1	-0.619865	#N/A	-0.64067	#N/A	-0.0429322	#N/A	0.0657132	#N/A	-0.168954	#N/A		#N/A		#N/A		#N/A		#N/A		#N/A
[K].aVADWPVLGkk.[L]	P09436	ILS1	0.360244	-0.0230341	0.00434427	0.167448	0.315338	-0.0333211	0.293349	-0.183539	-0.050191	-0.0441549
[D].iAkYDGSkTDPIGDEEQSInDTIFk.[L]	P09436	ILS1	-1.0735	0.648864	0.777327	-0.0770716	-0.0663687	0.129136	0.144007	0.31053	-0.17791	0.0246906	<-3 sigma
[R].fGWDTHGVPIEHIIDkk.[L]	P09436	ILS1	1.01494	0	-0.015657	-0.352405	0.606612	0.789258	-0.183661	-0.20169	-0.195725	0	>3 sigma
[S].iVLNkYGADALR.[L]	P09436	ILS1	-0.174053	#N/A	0.0660725	#N/A	0.205281	#N/A	0.269362	#N/A	-0.173825	#N/A		#N/A		#N/A		#N/A		#N/A		#N/A
[Y].aTmTGHHVER.[R]	P09436	ILS1	0.709906	0.543311	-0.0659356	-0.0741172	0.0161065	0.0061674	-0.0973119	0.127196	0.0101837	-0.108932
[T].mTGHHVER.[R]	P09436	ILS1	-0.544744	#N/A	-0.0578504	#N/A	0.112819	#N/A	0.239904	#N/A	-0.406997	#N/A		#N/A		#N/A		#N/A		#N/A		#N/A
[F].lSYPVVkkEYFDEAIETAVSR.[M]	P09436	ILS1	0.573319	0.633624	0.137221	0.310836	0.258635	0.360565	0.170655	0.142282	-0.0557928	-0.223174
[K].iVEkIkGSDLVG.[L]	P09436	ILS1	-0.153977	#N/A	-0.00646415	#N/A	0.33884	#N/A	0.336227	#N/A	-0.0807755	#N/A		#N/A		#N/A		#N/A		#N/A		#N/A
[Q].lkADQEYEIEkTNIVR.[N]	P22203	VMA4	0.430831	0.429757	0.101249	-0.181636	0.0372514	0.0912889	0.0926946	0.0336799	-0.270698	0.113968
[A].lTPNQVNDELNk.[M]	P22203	VMA4	0.0261512	#N/A	-0.336633	#N/A	0.0638916	#N/A	0.23263	#N/A	-0.317189	#N/A		#N/A		#N/A		#N/A		#N/A		#N/A
[S].lDGIFEETkEk.[L]	P22203	VMA4	0.0261479	#N/A	0.0731991	#N/A	-0.0570124	#N/A	0.608322	#N/A	0.554317	#N/A		#N/A		#N/A		#N/A		#N/A		#N/A
[D].lVSGGVVVSNASDkIEINnTLEER.[L]	P22203	VMA4	0.0332511	#N/A	-0.0713294	#N/A	0.358006	#N/A	0.0332047	#N/A	0.237449	#N/A		#N/A		#N/A		#N/A		#N/A		#N/A
[K].lLSEEALPAIR.[L]	P22203	VMA4	0.288603	0.00116815	-0.0319836	-0.354151	0.0972291	0.182248	0.171152	0.0208677	-0.200592	-0.0916026
[A].lTPNQVNDELNkMQAFIR.[K]	P22203	VMA4	-1.09452	#N/A	0.0955843	#N/A	-0.0846095	#N/A	0.0452065	#N/A	-0.221299	#N/A	<-3 sigma	#N/A		#N/A		#N/A		#N/A		#N/A
[N].iDGNFkSk.[L]	P22203	VMA4	0.324377	0.2151	-0.0610963	-0.128396	0.347349	0.053808	0.342921	0.110989	-0.224018	-0.109335
[K].lLSEEALPA.[I]	P22203	VMA4	0.598205	0.505789	0.469726	-0.0579069	0.290457	0.324246	0.14973	0.290687	-0.125024	-0.0890198
[K].fSkQQAkGAFQk.[V]	P04449	RPL24A	0.431974	0.213414	-0.0649639	-0.0417192	0.444386	0.334486	0.295977	0.119425	-0.29095	0.0282429
[P].iTGASLDLIkER.[R]	P24000	RPL24B	0.0439251	0.252593	-0.0421457	-0.0495636	-0.0169306	0.0205134	0.134673	-0.0277766	-0.144575	-0.0260916
[G].aFQkVAATSR.[-]	P24000	RPL24B	0.21267	0.194931	-0.0449214	-0.23341	0.122751	0.203501	0.275248	0.0881663	-0.0535656	0.263304
[S].lDLIkER.[R]	P24000	RPL24B	0.133714	0.205747	-0.0232587	-0.0387263	0.232392	0.0131828	0.18523	-0.0471308	-0.239059	-0.0506942
[G].iTEEVAkkR.[S]	P24000	RPL24B	0.0546892	0.261966	-0.136917	-0.0623768	0.200579	0.0679973	0.2799	-0.0131624	-0.328441	0.0726825
[R].iAWTVLFR.[K]	P24000	RPL24B	0.943877	#N/A	0.44899	#N/A	0.60207	#N/A	-0.149606	#N/A	0.140561	#N/A		#N/A		#N/A		#N/A		#N/A		#N/A
[G].aSLDLIkER.[R]	P24000	RPL24B	0.246442	#N/A	-0.0404945	#N/A	0.0472593	#N/A	0.133287	#N/A	0.0465471	#N/A		#N/A		#N/A		#N/A		#N/A		#N/A
[S].fSGAkIYPGR.[G]	P24000	RPL24B	0.509025	0.236044	0.0488866	-0.157802	0.17707	0.117008	0.190857	0.0694958	-0.149657	0.119561
[K].fSkQQAkG.[A]	P04449	RPL24A	-0.0197599	#N/A	-0.0961614	#N/A	0.265368	#N/A	0.20601	#N/A	-0.181958	#N/A		#N/A		#N/A		#N/A		#N/A		#N/A
[S].aSLFkQR.[K]	P24000	RPL24B	0.808379	0.384988	0.0957599	0.114256	0.24437	0.0410042	0.0944866	-0.0918593	-0.700252	-0.168034
[R].fQNSkSASL.[F]	P24000	RPL24B	0.297841	#N/A	-0.117525	#N/A	0.371656	#N/A	0.32657	#N/A	-0.0469952	#N/A		#N/A		#N/A		#N/A		#N/A		#N/A
[S].aGTQSSk.[F]	P04449	RPL24A	0.0516443	0.0157837	-0.0371091	-0.0412009	-0.016457	-0.154406	0.0209699	0.101125	-0.0756002	-0.353571
[K].fSkQQAkGA.[F]	P04449	RPL24A	-0.0910647	0.142183	-0.108152	-0.254263	0.0113949	0.14544	0.150172	0.140656	0	0.301471
[T].lAAGYGkILGkGR.[I]	P02406	RPL28	0.0846404	0.12487	0.0280437	-0.0564289	0.259516	0.155076	0.245829	0.136718	-0.271387	0.0881011
[R].fVSkLAEEkIR.[A]	P02406	RPL28	0.185729	0.45715	0.125013	0.164511	-0.268997	-0.189229	0.0629001	0.131596	-0.276693	0.422379
[S].aSkETAPVIDTLAAGYGkILGkGR.[I]	P02406	RPL28	0.304729	1.0787	0.0598338	-0.0444462	-0.0498288	0.0322566	0.170347	-0.0789543	-0.276653	-0.436625		>3 sigma
[Y].lkSASkETAPVIDTLAAGYGk.[I]	P02406	RPL28	0.137641	#N/A	-0.172034	#N/A	0.211438	#N/A	0.352058	#N/A	-0.339481	#N/A		#N/A		#N/A		#N/A		#N/A		#N/A
[S].aSkETAPVIDTLAAGYGk.[I]	P02406	RPL28	0.239629	0.0621622	-0.22128	-0.00332258	0.209913	0.343713	0.167937	-0.00905826	-0.141195	0.0317544
[T].lAAGYGkILGkGRIPNVPVIVk.[A]	P02406	RPL28	1.08124	#N/A	0.174734	#N/A	0.34334	#N/A	0.465138	#N/A	-0.332102	#N/A	>3 sigma	#N/A		#N/A		#N/A		#N/A		#N/A
[F].vSkLAEEkIR.[A]	P02406	RPL28	0.187329	0.366082	-0.0157703	-0.262494	-0.249628	-0.153931	-0.0342553	-0.0123231	-0.339847	-0.000755299
[T].lAAGYGk.[I]	P02406	RPL28	0.0239938	0.151985	-0.156328	-0.0298663	0.323898	0.191173	0.276435	0.067463	-0.165267	0.0513546
[R].fVSkLAEEk.[I]	P02406	RPL28	-0.0690788	#N/A	-0.26054	#N/A	-0.0535559	#N/A	0.14845	#N/A	-0.32573	#N/A		#N/A		#N/A		#N/A		#N/A		#N/A
[R].aAGGVVELIA.[-]	P02406	RPL28	1.52694	#N/A	-0.109837	#N/A	-0.73118	#N/A	2.1301	#N/A	-0.59021	#N/A	>3 sigma	#N/A		#N/A		#N/A	>3 sigma	#N/A		#N/A
[R].iNMDkYHPGY.[F]	P02406	RPL28	0.254025	0.191343	-0.0822037	-0.151743	0.157693	0.105073	0.156474	0.139479	-0.284028	-0.129271
[T].lIPEDkR.[D]	P02406	RPL28	0.159277	0.134781	-0.102889	-0.163612	0.083617	0.187133	0.0279135	0.049701	-0.173367	0.0562198
[K].lAEEkIR.[A]	P02406	RPL28	0.124698	0.165194	-0.0935617	-0.187183	0.0434332	0.0206352	0.118178	0.152904	-0.174504	0.208633
[L].aAGYGkILGkGR.[I]	P02406	RPL28	0.180758	0.504858	-0.168927	-0.221055	0.142593	-0.017146	0.216702	0.254058	-0.0899858	-0.308552
[F].iAPPSVEDLkkR.[L]	P15454	GUK1	0.0257345	0.155786	-0.0322389	-0.0983142	0.15221	0.101435	0.248894	0.0885946	-0.226716	0.0381341
[S].vkAIPELNAR.[F]	P15454	GUK1	0.0801173	0.227711	0.0452404	0.0643824	0.128059	-0.00936578	0.172622	0.078128	-0.0977084	0.0533024
[F].lFIAPPSVEDLkkR.[L]	P15454	GUK1	0.363868	0.295334	-0.0765001	0.25664	0.187961	0.0832665	-0.0164807	0.00652571	-0.536576	0.205881
[L].fIAPPSVEDLkkR.[L]	P15454	GUK1	-0.0197847	0.389327	-0.0132018	0.0709492	0.116314	0.0191909	0.160357	0.238032	-0.248327	0.170433
[K].lFAEYPDSFGFSVSSTTR.[T]	P15454	GUK1	-0.204595	#N/A	-0.388255	#N/A	0.256672	#N/A	0.141327	#N/A	-0.394826	#N/A		#N/A		#N/A		#N/A		#N/A		#N/A
[C].iLDIDMQGVkSVkAIPELnAR.[F]	P15454	GUK1	0.309871	1.70262	0.180054	-0.353551	0.249894	-0.0738653	0.00919162	0.199963	-0.17643	-0.105953		>3 sigma
[E].lkDFIFAEk.[-]	P15454	GUK1	0.0606212	0.400963	-0.184728	-0.3378	0.425971	-0.129734	0.220088	0.161877	-0.271848	0.609141
[truncated: 2,961 more rows]
